# Supplementary material for: Candidate chemosensory genes identified in Colaphellus bowringi by antennal transcriptome analysis
Source: PubMed Central journal article supplement (PMC4667470; doi:10.1186/s12864-015-2236-3), 2015-12-02
Supplement: 12864_2015_2236_MOESM6_ESM.pdf [file 12864_2015_2236_MOESM6_ESM.pdf]

**Additional file 6: Table S2 Amino acid sequences of *C. bowringi* and other insect used in phylogenetic analyses**

**OBP sequences**

>CbowOBP1

ELTEKQMKATKKLIRNTCQNKAKATTEELDAMVKGNFNQGKNAQCYQLCILNTYKLLKS  
DNTFDWQAGVNALKANAPERIAGPGSASIKNCKDALKTKDDKCKGATEIAQCIYEDNPE  
NYFLP

>CbowOBP2

LNEKQMKAAVKMVRNVCQPKFKATDVDIDKMHKGDWNIDHTAMCYMHCAMNMYKL  
MNTDNSFNYSALAQNLQPLDSYKKATEICMEQCKDSAVTLSDKCISAYELAKCMYFCN  
PEKYFLP

>CbowOBP3

MRAAKGDYQDDMKLKKQILCFNKKVGLQDENGDIVLDVAKSKLFDIVKDEKKTMDILK  
KCAVKKDTPENTAFESAKCLHKLAPEEKLVI

>CbowOBP4

MKHREEIGLECLRQVNIQRDTIENAKATLNFPEDRKYKDFLACSYKKQGFQSQDGVILYN  
SIKDFLSRYYKRNDLKVMDNCKENIREDHGEMALNALRCIMDNLKNMEEKSRR

>CbowOBP5

KPLSEEGREKAQKINEECAKESGIEEDNLEKILADEFPEDDKMKEHSFCFLTTLGVMDKDG  
KIDKDVMTDTLKLFAPEGKEVEIMEKCAVETDDAKETAFAIGKCVHEQVKS

>CbowOBP6

GQLPEDEKERLRQVHLSCQADSKTYCDEDLLRKLGDNVNPNQVGIHMLCMSVKAGLQE  
RNGDLNRSFIKSRIALVTEQAKVDGYVQKCAVKKETPEKTAAMLWLCFVQNGINYYHKL

>CbowOBP7

LSEEMQELADMLHATCVHETGARQDDIENARKGIFAEDEKFKCYIKCIMAQMACIDEDGII  
DEDATI AVLPEEYRNQAEPVIKKCGTKKGSNPCENAWLTHKCYQNEAPEDYFLV

>CbowOBP8

VGKFPDGRPYPDGFEDCLKSSNAKLEEVLNKPKANISEEVYCFKCLSERVGFIDQQGNV  
HIDKMDVTQIFQGAVEEVPDELKSCLGGVNVKVESQDMSKICECFLKMAP

>CbowOBP9

VRNTAGKITQNESAKKTLGNCKTETGATMADIESLKEKKIPKTKTGRCFMECLFSKAKIM  
DNGRFNKGMVVAFTPALKGDLTKMGKRLRELSEVCEKEIGLNKLENCEGGKKIVECVAK  
HGKSYGMSFSTTK

>CbowOBP10

EKKLPIEAEECLKITNTDLKDMMAHPKEMSESHYCFKCIFEKRGIIINKVDGTVVPDVLDD  
IKDVAVLQVASEEKLAEKCKMADVEKIEKCTDMENFRVCFDKLMS

>CbowOBP11

YITEEGWGEPLIALANSLHNKCVPIVGVTQASIDQVKEGNFIEDEKMKRYVLCLWLWVSEVI  
SEKFEINTEIFKLLPKKLQDGHNIIGCTKKINGTDVSELYEKTYSVTKCIQKANPDEFIMF

>CbowOBP12

LECGIAKANRNEIRQALSMCVKNNDTLEDILEMSSLSSSTTSPTEDSDDEDSQEDTIKSTS  
STTKSPRIKSSRIKRARSFSNTKQYASKATERNREESNNSNNTNKNIDNLKDAQKDDSED  
DNEVSQETPKKRQDMSENCIVHCVLEHLNLTDETGLPDHSLSEELLKTASGRELRNFLQ

ESTDECFQEVNEENDLDSCSYTTKLITCLADKGKSNCADWPAGALPF

>CbowOBP13

GVTEEQKKKIESYHKECSKQTGIDEDLVNKARNGQYTDQILKDYLFCTSKLAGFINDNN  
ELQKDVILQKTSVSTKDSAAAQKMFACAVPQKNGPETS YHVLKCYEYKSGLSLV

>CbowOBP14

APSDSSNSTIKDYCIKEVEISEEKVNFKEKNPDDTPDEDIMCYTHCILVTLGVVDDDGKIIIE  
KFTKIFDKYDMECVKKIPKILECTDLINLNKCAATDE

>CbowOBP15

EETEKEKMKRIHEECQSDPATKVEESVLKAAEEGDVDVTKIGPHTLCMNVKVGLQKENG  
DIVKDELRAGLRRVPGVDESKIESIVEECGQREGGTAEAAIKLFQCLQKRSKITHHHHHH  
E

>CbowOBP16

YLSEEDYGPKLSAVANKVHNACIKKHAVNEDTIMQVRKGNFVEDELIKKYISCIWLLSTVL  
DESGNLNIKIINDLCPKPKGKDTLPKIYHDCHAENAGVSQLDEKVYNIMKCWYEKDPPELFF  
VL

>CbowOBP17

IELPSELQEYVEDLHKICVTKSGISEDHAAAYDVKTNPDPKLCQCYMKCLMLEAKWMNP  
QGDIQYDFIIDTSHQPQIKDLLVAAINKCRAIDNGANLCEKASNFNFCMYDADPVNWFLI

>CbowOBP18

GKNQTNCDIPASAPKRIEETINSCQEEIKLAILTEALEALNVNEHIHSRAKRSAFSKDEKRI  
AGCLLQCVRKMNNAVNERGFPTAEGSLISLYTEGIRHKDYVLATMQAVNHCLYHVQKNHL  
TTPQSIDEHGKTCDIAYDVFDVSEEIGKYCGQTP

>CbowOBP19

TDREDKMKIHNVCVAETGVSQEFIDKMIAGEFCDDTNFKNYLVCFLKNDGVFLDNGELK  
ADGANRQIREFADDEDTVSGFMANCAVQMATVEESAFHYSKCMYNTLYG

>CbowOBP20

LTEEQQQIMESLHAECISQTGATEDMIVNARNGDFSEDNKLKCYMKCVFEELGVLDGDDG  
KVDIDGILAMLPEYKDVATTVFNKCGTQAGTDVCDIAIFQTHKCYAANSEHYFLP

>CbowOBP21

WMSDDKFGDKLEKMYRLWHDDCMKKTGAPENTVELIRSGIFDDPRMKAYNRCLYTDV  
MDKNARLLPEKLDYYIYPAFGKTGLKMYLDCEEKVKDEANYDDRKYKMQQCIYEANPD  
VSFNFF

>CbowOBP22

QMVSQSQLNTILQYHTECREKTKLPNSLVTLIAGQFPNDPVLKSHLLCVHQKLGVDQAD  
GNLRKEFISSETLGAVLPASVDSKELLNKCAVQKSSPEDTALDLDRCLYQTVQPMRG

>CbowOBP23

LSEENMKEIEEFQKSCVAEVHTSPDVLSQIMSGDVSDDPKIKAHLLCFAKKAGVMTESGE  
TIMDKLKQKLNQYLGSKADGFFEKCNIEITTPEDTAFNVYKCLSEMLQEGK

>CbowOBP24

MNVHAGLQKPNGDIDKDDLRRALSEGIRDVITVDDIVDDCGQRVGSSTAEASVNLFRCIF  
GHSNAYVHEWKPSMLRQTSGAEGFFTSSLVLSVILATLSVRLI

>CbowOBP25

YNFEDTEFNQILANDLEDVYSFTYSHPRSRRDDKAVEEDKCHPPRRGRPLCCAETMRKL  
HDDKKEIKRACFKEITGKEKPERPDRHHGPPFDPFSCIEQHRDMMCIQQCVGEKLDY

LDADGPKPEQFEKYVEGIFEKEDYLLPLKDKIVSVCLDEAKNATEKVSSDPCKSTGLVLE  
HCIFINTQLNCPEDQIKDKKMCSKFQDRLRQGFDRSSPSPEAEDE

>CbowOBP26

KVDPKVIIEEIEEFTETVAKCSDEINPNADDIAALTEMKHIPDSHEGKCMYCIYRSFDAVEE  
DGHVKFEGGMAFLSKIKESDPDMFDKMSAIYKKCTETDYFDKPCISSANFVSCNIKAGK  
EANISSDISSW

>TcasOBP01

EDDDRQETIRQYRDDCIAETKVDPALIDRADNGDFTDDAKLQCFSKCFYQKAGFVSETGD  
LLFDVIKDKIPKEANREKALAIIDKCKELKGADSCETVYLVHKCYFLHSYGTDKKTE

>TcasOBP02

LTDEQKEKIKNYHKECSAVSGVSQDVITKARKGEFIEDPKFKEHLFCFSKAGFQNEAGDF  
QEEVIRKKLNAELNDLDATNKLIAKCAVKKDSPQQTAFETIKCYENTPTHVSLA

>TcasOBP03

LTDEQKSKLEEYSKECLKESKVDESVLKEAEKGVYLDLDDPKLMNHVYCLVKKINSQKDKG  
ELEVTDIKEKLMQINDEKEVDKLIQLCLVQEKSAARYSLGKCEVSS

>TcasOBP04

FNNPEDELRRSAACLEQSKVSSSESIKLNQIGNFDDDERLKEYLFCVSKNAGYQDPAGHLQ  
HEMIRLRFKGGRYSDDTINEVLQQCGHQKDTQPETAQFMKCAAYQNAFPRNYK

>TcasOBP05

LTKEQIDKLEPISKECRELNGISEDITLKVRRGEAVNEPKLKNHVLCVSKKTGLASETGETN  
VEVLRTKLRKVSENDDEVNSIIQKCVVKKSTPEETAFAEIFVCLRKVKPNFSPAN

>TcasOBP06

LSEQQTEKLNQLSKECRALTGVSQETITNARNGNFEEDPKLK  
LQVLCIGKKVGMNESSQIDENVLKAALRKRKVSNDDEEVNKIYNKCAVKKPAPEETAFAFI  
KCVMMKNKPKFSPVE

>TcasOBP07

LTKEQKEKLDKISKECKNQSGVSQELIDKARTGELINDPKLKAQIYCVSKKAGLATEAGEI  
NMDNLKTKLKKVAANDDEVNKIIQKCVVKKPTPEETAFAFEVYKCLHANKPNFVVD

>TcasOBP08

KQDFHKKCLASSGANADTIAKVRNGKFSNDPQTQKYFGMLRSVGVVNQAGQLQVAAL  
RKQVPKDMKRDEAMKIYMSCKDKKGANNDETAYLLYKCFWEASPRHVKIDGQ

>TcasOBP09

FSLSNREQAIFLSTYSTCLETSKVDSERALRTASGIIDDEPKLKEFLFCINKQNGVQDDAGN  
FVKDAVRKRIEHPDLLDKTMEIIVNKCTRKRETGEETAYQFLKCSYFTIMNEKHQ

>TcasOBP10

QHLTEEQKNNWRKWSNECKVLIGVSQEAINKIRNNEFDSVDDKIKKHGLCFAKKASLAD  
SSGNIINQIKIKLRVIEDDEEVDRIVTKCTIRKNTPEETTFETFRCLRENSSKFVPV

>TcasOBP11

LENEGQNPDTANCVALGGQRIKDSEIAKMAHCILTCTNLMTDKGTFNSNLLKERLRQSVH  
SDELVDKVVMMCTVEKETPLKSAFSGYKCLRYLVPWFPLD

>TcasOBP12

KKCFLAEDTDKLEVMINECKTKTGVPPDILQKARNGEKIDDPKLREHALCMMKKSEMM  
NDAGEMQMDKIRARIKHAVSNEAEGTRIMNECAVKKDTPLATAYEMICCLIRNKNSVDE

>TcasOBP13

ETAKEKLRKYSDECKSVSGVSEELLNKVRNHEDVHDPKLDEHGFCILKKAGFMNEAGDI  
LADTIKTKLKENSEHPDPTVDALVEKCNKDKDTPQHTASHLFTCLVDKKVHSH

>TcasOBP14

RKWFDKDPQDVAKWQKECFEASGVSMESMNKLPNITLSEDPKLGENAFCLLKKLGFISE  
DGTLLIEKLRTSLKNQWGDEIANKLVNECARQKSTPQETAHEMFLCIPAKLK

>TcasOBP15

KQQKQDTLDEEKEKMKKWTQECIQESGVTSEILQQLRNQKRVEDPKLKEYTFCTFKKNG  
FMNEDGKLQYDVIKSTLMKVSGSEEEANKVVKDCVVEKSTPQDTAFETVDCWYRYKKN

>TcasOBP16

EEMQELVNQLHSTCVAETGVSEDLINKVNSDKVMIDDEKCLKCYIKCLLTETGCISDDGVV  
DVEATIALLPEDMKAKTTPVIRSCGAKMGANPCESAWLTHKCYLETSPADYVLI

>TcasOBP17

EEMQELANTLHATCVDETGVSEDAIESARKGNFAPDDKCLKCYMKCIMEQMACIDDEGIID  
VEATI AVLPEEYQAKAEPIVRKCGTKIGANACDNAFLTNKCWYEEDPEVSLQLN

>TcasOBP18

IEMDDDMKELINNLHNTCTGETGATDDQIENARKGNFAEDDSFKCYFKCVFDQMGCMTD  
DGKVDSEAVIAVMPPELADKIASTVRGCTEVGANPCETAWLANKCYQKSNPDVSKVSSN  
VRSD

>TcasOBP19

EIVVPDDLKDYINELHDHCLKEMGLTEGDHKNYNIHVKDPKMMCYMKCLMTTSKWMN  
MDESIQYDFILSSVHPAVKNILLPALDKCRDIPKGTMECEKAYNFMCLFNADPENWFFI

>TcasOBP20

EIDGYDYICYKQIGLTKDDLKAYKIGDRDPKIMCFMKCVFVEAKWMDENENLQYDYIKN  
TIHHSIRHITLPELENGKKAEGDKCEKSFSFFNCMNKAEPEDWVLIQ

>TcasOBP21

EIDEYFEQCFEPNGVTMDDIKAYKMGDKDPKIMCFMRCLFVSGKWMDENENMQYDYIK  
ETIHHAIRHITPELENGKEAQTGDKCEKSFNFFMCMNRAEPEV

>TcasOBP22

EEDNVGKIESVEKKCQEKTGVSEESLQKIMRLEEVDPLVKENALCTLKAYGVMDDDG  
NIFPDKFEEKLKPEIGADEAKRVAEKCAVKKDSPEETAHQTLWC ATEENALDTSQEQ

>TcasOBP23

DEDNLNTENVQSI EEDCQKETGVSESLQELSETGDSDDPLVKKNALCILKAYGVIDDQ  
G EISEDKLEEKLEPDRGKEEA EKVAKSCAVKKDSPEETAHEALLCMQKKSQK

>TcasOBP24

TPSLDDFKKVQKDCQKKTGVSEDESINKVNNLEPVCDDLLLQENALCILKTYEVMDEEGKI  
CPDKLMEVLEPKFGKEKAELIEKCTLEKDTPQLLAHATLFLSVQKYVV

>TcasOBP25

QFLQKIKKVS EDCIAETQATKN DIKTLL EHKIPDSHEGKCMIFCFHKHFQIQNEDGSLNKVA  
AISLLEPIKDHSQDIYDKVVKIFNTCFDSAERDDSDCIYASNLAECAIRESKSVSVQ

>TcasOBP26

VDQEFVEKFLQKMEKIGEECAEETHATSDDIADLIEQRDPKTHEGKCLIFCYHKKFNTMK  
EDGSLDKVGSVLAL EEV RDADFELYKNILTIFVTCGDKAKIYDDPCETATALTMCGRDEAK  
AVSWAYFA

>TcasOBP27

FLEKMQEFGAQCAEETDATSDDDIAELIARKLPPSTHEGKCMIFCMQKKFNMMKENGIDR  
AGAIAALKPLQKADPELHQKVLKIFVTCGMRVKPSPDPCDTATELALCGKKEAEAVFCRL  
GWKTLS

>TcasOBP28

QDFIDKFVAKVKSIGETCVPETNASKDDISSLLAHKMPDSHEGKCLIFCFHKQFQIQNDDG  
SINREGAIKALEPLKADDAELYEKVISIFKKESTPVDGDSCLYAASLAECAVKEGRAVSFW  
KNTNFKLI

>TcasOBP29

MDESFLQQTRDRVKAIVKECVTEEKATDSDFDDIMALKIPTSHEGKCVFFCSHKKFNMQH  
PDGSINKEGALDTFEVVKDVDVAEFHDKVITVYNHCLSTPVDPCVYSVNLVFCFMKEA  
KAVRK

>TcasOBP30

IDKEFVQELRQKLRSHVEACAKEVNAGPDDVSAIFAHKLPATHEGKCIFFCMHKLYNAQN  
EDGSLNMAGALANLELIKMDPDVYTKVSTSFKNCESAPFSDPCLYAANLVTCIVKEGR  
AVSNNFSGFFF

>TcasOBP31

GVSIIIDPKFLEKLTQEVQAVGTSCGEKEHATADDMIEIMEEKFPPTSHEAKCVVACFYKH  
YKMMKEDGTFDKDAAVKAFDEIKAQDAEIHAKILKVIDACDAKKQMSDDHCVSAASMA  
GCVKTEAIAV

>TcasOBP32

LSLSATVFGQSLSEDEMRENARKLMTSCKDKVGASDADVEALKMHQMPESREGFCMLE  
CVFDSAQIMQDGKFSKSGMIEGFKPLIGDDKAKLESLEKLSATCESELGDGEDKCETAKRL  
VECVIKNGKTHGFVPPPRE

>TcasOBP33

EENDINEIRSVEENCQKQTGVSVEKVNNFELVDDPLVKENALCILKAYGIMDEDGNIYEDK  
LKEQITSELGEKNAEQVAKKCTIKKESPQETAHESLWCVGEQKPIPGASPDEKN

>TcasOBP34

DESVYLSNHEACVKLSGVDETLLETIYEGDVFEDMKFKTYIHCFFKKSQDENGVMHF  
DAIKSSFHKDFSQTENIDKTITECEEKKNLNGESALETAFLHFKCFMGEL

>TcasOBP35

QMKAALKLVRNVCQPKTKATNEQIEAMHTGNWDLKNGKCYMWCILNMYKLIKDNS  
FDWEAGIATLKAQAPESVRDPAIASVNNCKDAVKTTSDKCEAAYEIAHCMYLDNPEKYFL  
P

>TcasOBP36

AMSEAQLKAAVKLVRNMCQPKSKATNEDIEKMHHGDWNIDRTAMCYMHCALNSNKLIT  
KENVFNRDYAITLAEKNLPTALKTASIEAANLCKDSAKTLDDKCVAAYEISKCLYESNPEK  
YFLP

>TcasOBP37

AILEDSELMKVVENCVKKTNANESEFSSPNFLETTSPQALCTAKCLLESLEIVNSEGNINM  
ETLKEYAQPFESPAREAVATCGEEIKSVTTCDDMEKYRKCVEPLIKNS

>TcasOBP38

EVREECLSENSMTMDELHEGWKMNLPESHLCFLKCLLEKREVIDENGVPQKEKIDEILT  
VKQLSDEKREEISTCITNVEKIENCETMSEIMRCFPKRRD

>TcasOBP39

LDLMADKNFVELRNKCLDKLGLKEEDLRDLKFDGDVSEDLMCFGKCIQEEDGLLDSEGN  
LNEEKLEKKIETMPFLSRVSDDTKNNIMECLKEIGKIETCQDFGKQRDCIHKYV

>TcasOBP40

EKESEEAQIFTELDGPAELRDQCLEKNSMKVTDLKYNTSNDIPEKELCFYKCFYEGVEF  
IDANGNLNVNNMKEIPAISELGDEVLNEITACVEKIGKIRCCGDLRKIEQCYQNITM

>TcasOBP41

QGKYWTTISECLTEHSMGVEDMKKFDLPAEKMSEEMLCFNKCFYDKLLITDENGENTDN  
LMSIPLVNAIDASKHDDLVTCLKKVGKIECDGVKKIEQCFVEFI

>TcasOBP42

LCMNETGVSEETARNYKPAEDPASEEILCMVKCIFEKIGCLKDDGSFCVDTMKKKNYIMD  
VINEENEEKIYECLRGVVKITNCRDMAAVEECFVKNDK

>TcasOBP43

RSFSHDELDTDLSEFIKTCNRTSPISMSKFGLFLTEFNLTPEGTMNECFHCLFMKYGWMDS  
DGGFLLHDIKQTLSESDVEIASLEFILYKCTATESNNRCERAFVFTQCFWDKMAEQQPSD  
QFFYNIEDKK

>TcasOBP44

QPEDRHQIALQCIDIVGIDQKVEDAINIEIPKNNPKYKEFLACSYKKQGYQNGEILME  
NIKKFLQKFYHPSDLQELNSCSGHNGTNHAENAYQALQCIYNRLSNMTVVGN

>TcasOBP45

AIRPWRTCGTWPPCPPNGKMLQNFRIKRASVRLTNTETNETTPEPKAVSSEAQATENCIIQC  
IFDNLQMTDSTGYPVHTKILDGLLKNTTRELRLDFLQDTTDECFQVMDKEDTMDPCSYS  
NKLVTCLAEKGRSNCADWPVGELPFKP

>TcasOBP46

MLWRRGRFLYGENLDMFDPAGLQACMKKLSVGETELAKALEDKSKDPPEKIMCLFKCAL  
EDSGFLQDGVVDKSKWPMPECVQDVVKITNCNDMVALKHCFD

>TcasOBP47

YEFNDPLFMELESSAYPHRSRRDEDAVTEKCRPFRKKKLCCAETFDLHDKDRDFKRE  
CFKQVVGSKDGPREFDPFRCDKVDKHRRDMTCVSQCVGQKKDVLKDGNVKEAEFGF  
VKETMAKESWFVSIQDKVVSTCLAEARNATANRDTSDTESCNPAGVKLMHCMFREIQLG  
CPTEIQDKQACARARDKIKRHNEFLPPPPQFLNDE

>TcasOBP48

EDAKEKKCDIPTAPKKIEDVINQCQDEIKLAILTEALEALNINEHTKSRAKRDTFSDDKRI  
AGCLLQCVYRKMKA VNEKGFPTVEGLVALYSEGVTQKEYIIATLQAVNVCLNKAQKKHLT  
KQSLAEHKGKTCDIAYDVFDVCSERIGEYCGQTP

>TcasOBP49P

MRRGYGRNLDMNLRAKRSNDNDDSQCVSQC VFGYLEVLDDNRVPSETLVIKWLQDHLS  
NDMKRIRALREARRCFARLSTSDTEDGCEFSQSLSKCLNLELE

>AcorOBP15

ETLKEHGQKVMKIIDYATSCADSLGVSPEDIKLLMEKKLPESKEGQCIPSCVNKKFGLQK  
ADGTIDKEYRNSDMEEVKAIDEEVYNKMNSIWDKCVLNGAEGSDECDTGIKLVSCMKEE  
SEKVGLNKEAMGF

>AcorOBP14

LTIEEKATVTKIGKKCIEETKVDVKLVEKGERGEFADDPKLKEFVFCFLKASDIINADGYPK  
PDEIKVRLANDAPVSEIDDVLSQCESKAATPVDRAADLWKC YWKKSPVHIPLQ

>AcorOBP1

MSEEMEELAKQLHNDCVAQTGVDEAHITTVKDQKGFDPDEKFKCYLKCLMTEMAIVGD  
DGVVDVEAAVGVL PDEYKAKAEPVIRKCGVKPGANPCDNVYQTHKCYDTPQSYMIV

>AcorOBP2P

SLQCLTETNADLTLVHKGQKGEFVDDPKVKAFVFCLLKKSQIVDDDGYPRPDVIKEKLSK  
DIPPDVITKVLAKCNPT

>AcorOBP5

SGMDSGVVKNII SLDTFPKPSDKYFKYLECMYFDQGYLDS DGLISYETIEDFILDFYDVDT  
VKQALEPCVVLQEGQNGGERAYNAAKCLIQNLEALEKRYEKQNK NADNTT

>AcorOBP4

YLTEAQIKATQKLIRRTCKTKAKITNEEELDRLPKGNWDDVSHTSRCYLHCCLSM LKVINS  
DGFIDLEAGMRQSAILPPERRASSEIAIDTCKDKGEGLTDKCDIAYEIAKCLYDFEPKFYLIP

>AcorOBP3

LNEAQMKA GIKLIKNTCRKTKITDEQIAKMHEGVWDDADDVT KCYCHCALGMMKMQ  
AKNGAFEYELFEKQKPMIPETIRETLIASVDNCINAGEGLTKKCDLSYAFFKCVYLYDPEH  
YMFP

>AcorOBP6

DAEYEA EKQKLRQKAVGLMTECKDKVGASAEDVQALTNKQLPTTDKGFC LIECIFTNGN  
VMKNGKLDVQGT LQVLDTALSKNPDAKKKT TAVLQTCEKEVGAGGANGCETAKLIAEC  
FKKEAKK

>AcorOBP7

TTKLLAIFQEHALKTGLDCLSEVDATMDDLKSIINHDMPTTRAKMCLITCIHEKFGIQDAN  
GKMLKDQTIAFLDV LKDDPPYHNLA KDHFLHCLETVSETDEKCTIGANLMRCIVVGGNE  
KGIF

>AcorOBP8

VTKLQRMIKDAIAHLGTECLSETSDATMSDVQDLVDHVRPTTRKALCLITCIHTKAGMQD  
EHGKLKEEGGLNFVEPLKQEDMDY YEISKEHFINCINTVPDDAEACIVGGRFND CIIIIGGK  
TKGILD

>AcorOBP9

LTDEQKAKLKVVSDKCIASSGADPSSVEKGRKGEFGDDPKLKEFIFCLLKATEMLDDNAD  
VRLDKIKAKISKDLTEAEIDTLLGKCKPTATVPVEKAAEFWKCYWANTPKRIELV

>AcorOBP10

KEAKVDPALIDKADAGEFADTKELKCFKCFYVKAGFITEQGELLMDVVKAKLPPEHERE  
KALAIIELCKDLKGADACETAYAIHKCYFQNAHAANLHKN

>AcorOBP11

HYRGARDTTQKCIDQNSCCSGPPISNFHASDKEASQQCSKEVNFNRGSIRGPLTAEQKDQI  
KCIAECIGKKKGYLTADGELIKDKLLSSMKERLQSVAWLAPKLDSMFEDCLPQNENTAKQ  
PKKCNDVGLTVGHCIWKQIQ LQCPLNEQQNPQNCKNLQEYLTTHNQFPAPPVKC

>AcorOBP12

ICMKNL PINGDQIIEN

TSMGQQGYDSSYEDDSKPSSEDSMSSKEHAMNSLREDSINDSMNRNGDNNLRN NTEIT  
DDCVIRCVLQKLG MVDPSGYPDH SKISQNLIKGAENRELKDFLQDSTDDCFQMMEQDEH

MDSCSFSTQLIKCLAEKGKSNCADWPMSDVPFSLF

>AcorOBP13

ASGESVFLHPRVRRDDEASKCHHRHKFCCGDELMSKLDKRYRDTKRECFKQVTGKEFGG  
GPPFTCEELEERKKEMTCVAECAGKKKGAVDDKGNKEDEVKKLVAECTAELEWFKPML  
DEVTTKICIAEAKAAAEKYDKKGCNPSDIKFSFCIFKEIQLNCPADQIKDQERC DAMRSLK  
KHDHPPVH

>DmelObp8a

vpmrsspqlallrardqcgreltaaqrlqldrmqfedaaahvrhlyhcfwsrlqlwldetgfqaqrivqsfggerrlnveqalpaingcnak  
tssrgsgaqtvdwcfrafvcvlatpvgeWykrhmsdvingna

>DmelObp19a

GvteeqmwSagklmrdvclpkypkvsvevadnirngdipnskdtnCyincilemmqaikkqflestlkqmdimlpdsykdeyr  
kginlckdstvlgknapncdpahallsclknnikvfvfp

>DmelObp19b

DeeegsmtvdevveliepfgdactpkpsrenivemvlnkedakhetkcfhrCmleqfelmpedqlqy nedktvdminmmfpdred  
dgrriVktceelkaeqdkceaahgiamcmremrSSgfkipeike

>DmelObp19c

QtqafdlakllpktgtepiwavidrnlpqvqelvtAarmeciqlqlprdqrpIlgkvtnpsekeclvecvlkkiklmdadnklngqve  
kltslvtqdnkmaiaivssmaqacsrgissknpcevahlfncisrqlernnvklvw

>DmelObp19d

Kpheeinrdhllelaneckaetgatdedveqlmshdlperheakclracvmkkqlimdesgklnkehaielvkvmshkdaekedapa  
evvakceaietpedhcdaafayeeciyeqmrehgleleh

>DmelObp28a

Fdekealaklmesaescmpevgatdadlqemvkkqpastyagkclracvmknigildangkldteaghekakqytgndpaklkiald  
igetcaaitvpddhceaaeygtcfrgeakkhgll

>DmelObp44a

Sdyklrtaedlqsarkecaasskvtealiakyktfdypdditrnyiqcifvkdldfdeakgfkvenlvaqlggkedkaalkadiekcad  
kneqkspanewafrgfkflgknlpvqaavqkn

>DmelObp46a

RstpalledcelnsvdtmhdfccdlhdespqfSDcmewhekipyetdeeeqymfctaecsfnstnflgrdrslnnevkehlesdl  
vndadikllydytvkcdkhalslmpkgykqlskrlsrlgchpypglveevanemilhcptkrfrqtaqceetrnhlkqcmqylkyks

>DmelObp47b

QatidcrrppqlvdpalckdggdrdqvaeqaaqrlgtangqkagppslDtaaclaeciltskyidepqlnlanirsdlsakfsndtly  
vetmtmafskcepqsrrlamimqqqqvqqktqqqprcspfsaivlgctymeyfkncpdhrwtpnaqctlakayvtqcglga

>DmelObp49a

Dvdcskrpsfvnptccpmpdfvtaelkqkcikfdmtpppppdgeasgsfeskrhhhhphpppcffscifnetgiyqnrkldeaklna  
ylqevfedssdlqtatqaftcatkvadfeanlpprpapspppgfpmcphdaghlmgcvfrnmknpcdsirndsqqctdmkefftk  
ckpprgpppsaedm

>DmelObp50a

Akraapksvqnvhccsaplpnwgfnrechksaiqasvsinrisskvnlanflikerldcdfnassvlqgnrliqakvrpmlerafs  
neptidayesnfakestvrskyqelsplrsqsdacdrhalfyslcayarliftcpdkmwqrnnrmcqeakayakcepwpalkmfmrn  
t

>DmelObp50b

Vsndmgglqkctellnthklvyccgksfldkfpvgsnctpfwddygp cryeclyrhwdlldqdnkikkpelylmitssylsplngydk



ygaafkaahetcealgrhadflllysnqvadkmgmasstclpyamlhaqctmvyltancprenwiddpkcnslqkllssctkkldekt  
nalkgkdeeldngcghidsegsnllmacfltlmiakfisdh

>DmelObp50c

Dpidvdctrqrdfnivkdccvyptfrfdqfksqcgkymvpgaprispelyecifnktntvvdgaihpdnarlmllekfgnqdfceayfn  
glmgcsdsvqemisnrrsrprkteqcspsflfygicaryvfnhpcssswsgtescemarlqnmncskpsrgsshrl

>DmelObp50d

Adpicsqrpdvtalrncklpnldfssfnksqylvngvhispcsfecifraanalngthlvmeniekmmktilgsdefvhvylgfrsc  
gnqekvlikamkrripitgkcgsmaimyglcahryvyrncpesvwsksatcneareysircddm

>DmelObp50e

Sfnscappnfnfdintccrtpeldmgdvpqkchkyvsglksanskypsyahlcypdciretgamvngkikvnrkqyleehvhr  
dqeivshivqsfesclsnvghmkslniesykvlpghgcsfpagiiyscvnaetflncpqqmwknekpcnlakqfaeqcnplphvplps  
s

>DmelObp51a

Lfeseanecakklgitpdyfenphssrvkcfyhqcmekleiiangvvtpdfdkvlnispesydkygvkvpclklshrdkcelgylvfq  
clkrefnl

>DmelObp56a

Sslnsdsdqdlakqhrefcaeevklteekakvnakdfnptenikcfancffekvgtlkdgelqesvvlekfgaligeektkaalekrt  
ikgenkcdtasklydcfesfkpapeaka

>DmelObp56e

Vgltdsqaeakqrakacvkqegitkeqaiarsgnfadsdpkvcfancfleqtglvangqikpdvvlaklgiageanvkevqakcd  
stkgadkcdtsyllykcyenhaqf

>DmelObp56f

Mkssekikaclkrqlgytitentkfdakedslqskcfyhellevgviandaisseqprkvlekkygitdtdelekaeekchsikasgkcel  
gyeilkyqsitkh

>DmelObp56g

Qqanidssvskelvtcdlkengvtpqdladlqsgkvaedakdnvkcssqilvksqgmdstgklltdkiksyyansnfkdviekdldr  
csavkganacdafkilsfqaan

>DmelObp56h

Npdfrqimqqcmetnqvteadlkefmasgmqsakenlkcytkclmekqghltngqfnaqamldtlknvpqikdkmdeissgvna  
ckdikgtndcdtafkvtmclkehkaipghh

>DmelObp56i

Gpikdqmaaagitaqdvandrhetddpghsvkcfrcflenigiiadnqiipgafdrvlghi vtaeavermeatcnmiksetshdescef  
awqiseceyegvrlsdvkkqqrtrnhrg

>DmelObp57a

Iqslsleetnyvsdclasnnsqaefqelidrnsseddldentdrykcfihclaekgnlldtngyldvdkidqiepvdelreilydckkiyd  
eedhceyafkmvtcltesfeqsdevteagkntnkline

>DmelObp57d

Ntsvfnpcvsqnelseyeahqvmenwppidraykclftcvlldglidernvqidkymksgvvdwqvwaielvtcriefsderdl  
celsygifncfkdvklaeakyvsisnak

>DmelObp57e

Ndpcphnqgidediaesilgdwpanvdltsvkrshkcyvtcilqyynivtasgeifldkyydtgvidelavapkinrcryefrmetdycs  
rifafnclrqeiltks

>DmelObp58a

Lkcrsqeglseaelkrtrvncmhrqdededrgggqgrqngyeygygmdhdqeeqdrnpnrggygnrrqglrqsdrnhtsnd

ggqcvaqcffeemnmvdngmpdrkvsylltkdlrdrelrnfftdtvqqcfrylesngrgrhhkcsaarelvkcmsyakaqcedwe  
ehgnmlfn

>DmelObp58b

Vrvhcrmeriheenihecckhqdgddvtescakqtnfrlpspneeaivdvtvdqamvgtcwakcvfdhynlmenntldmdkvr  
syykryhqtdepyatemlnayekchtqseeatekflslpivrafstakfckptssiimscviynffhncpasrwsnttecvetlafarkckd  
vltt

>DmelObp58c

Ikidcentainedhihyckhpdghndliegcarentflpnqneealvditadrairgtcfgkcvfsklnlmkdnnldmdavrsfiterf  
pddpeyakeminafdhchkgseentsmflskplfkqmskqfcdpkssvvlacvirqffhncpadrwsktkecedtlafskkccqdsatl

>DmelObp58d

Qdneettavaissgdltedkcntsragccselyigeedlvkcfvihspklpvdgdadigktrflscfveclykqkyigksdtinmkmv  
kldaektvdrpkekdyhiamfefcrkdavgvynllkaspgakvllkgacrpyllvmfmcisdhyqkhecpyfrwegtakagtkdmc  
enakaecyqidgitlptkspa

>DmelObp69a

Veinptiikqvrklrmrclnqtgasvdivdksvknrilptdpeikcflycmfdmfglidsqnimhleallelveeiyktinglvsscgtqk  
gkdgcdayetvkcyiavngkfiweeiivllg

>DmelObp76a

Mtmeqfltsldmirsgcapkfkktedldrlrvgdfnfppsqdlmcytkcvslmagtvnkkgefnapkalaqlphlvppemmemsrk  
sveacrthkqfkescervyqtakcfsenadgqfmwp

>DmelObp83a

Qrdenypppgilkmakpfdacvektgvteaaikefsdgeihedealkcymnccffheievddngdvhleklfatvplsmrdklme  
mskgcvhpegdtlchkawwfhqcwkkadpkhyflp

>DmelObp83b

Qeprrdgewpppailkglkhfhdicapktgvtdeaikefsdgihedeaalkcymnclfhfevddngdvhmekvlnaipgeklrni  
mmeaskgcihpegdtlchkawwfhqcwkkadpvhyflv

>DmelObp84a

Lqdhakngdifiiyndsfgdvddisttsapreadyvdfdevnrncnasfitsmtnlvqfnntgdlpddkdvtsmcyfhcfeeksgl  
mtdyklntdlvrkyvwpatgdsveaceagkdetnacmrgyaivkcvfraltdarnkptv

>DmelObp85a

Mspgsvvsmfltrpsldkgnseckslnlpahrkfnfaelytinmcieecnficgyieidppfrldlanirtnlqtiappqnesipflvd  
ayrkcelfrsshgrfthlpldiefiepcnfpalqiticvrihamqkcpsefyvdsdeclareyftqcvgdietnla

>DmelObp93a

Cdvqkndkainscrksllgnnstnsngevrnlksdkvalhaciaecsfrtngflsngtvntqalqksyqqrykndpnmsqlmlkslnsc  
tdyarkrvqefqwmpkkgdcdfypatllacvmekvynceptskwkntsdictamwkylvacddvasnkkk

>DmelObp99a

Dyvknrhdmlayrdecvkelavpdlvekyqkweypndaktqcyikcvftkwglfdvqsgfnvenihqqvlgnhadhneafhas  
laacvdkneqgsnacewayrgatcllkenlaqiqkslapka

>DmelObp99b

Ddwtpktgeeirkirvdclkenplsndqisqlknlifpnepdvryltsaiklgifcdqqgyhadrlakqfkmldseealqiaqscvdd  
naqknptdvafgrghqcmmaskigdkvrafvkakaeakkkaa

>DmelObp99c

Asvwlptaqmvyedlecrqesqeedaatlrclvkkglwtdesgynarriakifaghnqmeelmlvvehcnrmeqdtshlddwaf  
layrcatsgqfghwvkdmsqkever

>DmelObp99d

Dhhhhhdvkvkthedltnyrtqcvekvhaseelvekykkwqypddavthcylecifqkfgfydtehgfvdhkihiqlagpgvevhe  
sdevhqkiahcaethskegdsckayhagmcfmnsnlqlvqhsvkv

>DmelObp73a

VEYLIRFETKKAKCLNPPRTARKVESVIRECQDEVNRNKLVNEAYEILKEQVSQNQPPIDPN  
DDSIDFIWPSVPEAPSLDHSPNISQYIYVYDEPEPQRHVARLMRNIRRLDVASSGIYHPTLV  
PLEDKRIAGCLLHCVYAKNNAIDQRGWPTLDGLVHFYSEG VHEHGFFMATLRSVNLCLRT  
MTARYGVNRKELPKKGESCDLAFDVC SHMNTNIFKDLQFWAPFISYVNESRAINYI

>DponOBP25

QDFTEEQRKKIENRQCIEETKVNPD LIEKADLGDF AEDQALKCF TKCFYQKAGFVNDK  
GEVQKDVVEAKLPPQADKKRALEIVDKCALKGKD ACETVYLHKCYFEHTHPEADEKTA  
KDGKSEEKKA

>DponOBP1

KNNKCDIPLSAPKRIEEVINTCQDEIKIAILSEALEAFKVNEHKVVSRAKRS AFNEDEKKIA  
GCLLQCVYRKLNAVNEYGFPTVEGLVSLYTEGVTQKEYVVATRQAVTKCLEN AQKTHEIS  
TKTVEASKSCEVAYEVFDCVSLEVAKYCGQTP

>DponOBP17

LSDEMKELAQMLHNTCVAETGVNEDFIRKVN AEFADDENLKCYIKCLMAQMACIDDD  
GIIDEEATIAILPEEYQALAAPVIRACG TKHGANCENAWLSHRCYAEMEPSVSG

>DponOBP32

ELDQTS LPPETKELMAALHKNCIEQIGVSEADVDQLRAANFEEDAKLKYTRCLMAESG  
VMDENGAIDVEAF AEILPEDIRGNIQTIFRRCSLTNKDIEDQCVKAYEMVKCWHKEDPESY  
FMI

>DponOBP7

DLTEEQKQKIVANGKACVADTGADPELIKAARQGFADDAKLKAFALCMSKKIGFQNEA  
GEIQSDVVQQKLGSAIGDNEAAKLV EKCLVSKGSGEETAIQSFKCYENTP THIAVF

>DponOBP14

ELDQTS LPPETKELMAALHKNCIEQIGVSEADVDQLRAANFEEDAKLKYTRCLMAESG  
VMDENGAIDVEAF AEILPEAVRGNIQTIFRRCSLTNKDIEDQCVKAYEMVKCWHKEDPES  
YFMI

>DponOBP12

AMTEAQMKAALKLIRNVCQPKNKATDAQIAAMHNGDWNQDKNGMCMYMNVLNYYKL  
QLPDNSFDWETGLKVVESQAPPSMAGFIMETITGCKDAVKTRDDKCKAAVEITKCLYDQN  
PEKYFLP

>DponOBP5

MSDEMQLANQLHTTCIGETGAAEDAITNARNGDFSEADSFKCYIKCLLSQMAIIDDNDG  
TIDVDAMVAVLPEEIQEATEPIIRKCGSIIGANPCDSAWLTHKCYKKEGPEHYFLI

>DponOBP15

HPPRGPPGPPFLGHPDPESANECRTEVGLTSEDRETKKNGELTEKELCFIRCLGQKNGALS  
DAGALNIETIKNDLPDHLEDSEAVIACLKKGVTTCQHKKVAKCYPEPKEPMDRT

>DponOBP23

LKITLPELQEYVDDLHKLCLEKGGLTENDHQTYNINDKNEKMMCYMKCLMLESKWMK  
SGGEIDYDFIETQAYPEVRDLLLSALNKCR TIEEGADLCEKSYNFKCMYEADPVNWWFFV

>DponOBP18

LSDEMKELAQMLHNTCVAETGVNEDFIRKVNAAEKIFADDENLKCYIKCLMAQMACIDDN  
GIIDEEATIAILPEEYQALAAPVIRACGTKHGANPCENAWLSHRCYAEMEPSAYMLI

>DponOBP10

RLTEKQVAAAVKLVNRNMCMGKSKVNPEDIDKMHQGNWDVDYEAQCYMWCGFNMYK  
MLDKENHFDDKKSALQQMEQLPTDLQDYVIKCMGQCENAVTNFDDKCVVAFEYSKCLYF  
CDPEKYFLP

>DponOBP2

YDFQDATFNEILSSDFEDIFDTLDNTYLHPRAKRNEEAVNSDEKCRRRHHRKPKLCCGED  
VLDSLQEKEKEIVRLCFKDITGGVKESKPDRGFGNHRNFDLFSCEAVEKRKSDMICVEQC  
KLQKQGLVSDDGSPKPEQISTYLKEAFTTQTFWEKVSQGIVEKCVNEAINATKNPVKIFYE  
GNKLCRSRGIVLKHCLFNSIQLSCPAGQIKDKNACERFQERAKKGKDLFDQPPGPPPFDDN  
REEQI

>DponOBP21

LECGLSKISSEHFRKIASSECVKDNETLNRIWELTSEASMDDESASSDEEVPITQGKEAPNLD  
LGSSAQKSMKMSRASRTKRSRKSFNNEPMSQRKPSPTSTTTEQTTTIQSEENEDNADAN  
NVEESGEVCILQCIFEKLEMTDTNGLPDHKKFAAALVESATGRETRDFLQDSVDECFQETE  
EGDFENSCEYSTKLVTCLAGRGKSNCADWPVGDLPF

>DponOBP31

GNSDDLAFARIAPADVEMCGKDTGVDRKEFEDAREKRALNHSMLCFLKCAMEKVGFLKD  
GHLEIDQAKGSLPDKMMEPVVECFKAVGPISTCDDIQKVEDCLPSS

>DponOBP4

MGKQAGFINEAGDVLKDVLEKESLKLFPALVQKLIDQCIVKKETPQETS YHAHVCLYK  
NSPGHLALTQFGAISQEKKEKVVQIIEKCAEESGVSRSVLSARKGDFQDEPLLKQYFFCIN  
KKSQIQNEAGEYKTDVIRKGLTELFNAEEANRIIEKCARIQDSALNTAFQSFKCFYNEAPEI  
TGVF

>DponOBP20

LECGLSKISSEHFRKIASSECVKDNETLNRIWELTSEASMDDESASSDEEVPITQGKEAPNLD  
LGSSPHKSMKMSRASRTKRSRKIFNNEPMSQRKPSASTTTEQTTTVQSEENEDIADANN  
VEESGEVCLLQCIFEKLEMTDTNGLPDHKKFAAALVESATGRETRDFLQDSVDECFQETEE  
GDFEDSCEYSTKLVTCLAGRGKSNCADWPVGDLPF

>DponOBP13

DRQQVVDHFHRPCLDHHEIEDDLHFALDKIKMRDDDEFYLFHFFCVAKQGQLMTEDGTVN  
TDNFETNMKGIIEDNMENVAIVRLCLIQKDTVLQTIRNAVDCFMGKDHKL

>DponOBP3

DAEINQSTFEAGRNRIMEMSRTC DENPATAVDQKALENYLESNGPAPANAGVHALCITKN  
LGWQNEGDGSVNKPLITEKVKAIFGSVDAKIERYIEDCTEAKAKPEDTAEQLLNCYRKHSP  
KTE

>DponOBP8

LDQAWRDHMKEKLTTEFGLECAESEQATSEIDIEALHNHKPPVTHAGRCVIFCVSKKLNLM  
NADGTLNVTPQSDWIEKVKETDSEAFEKMKTVYHHCADTVEVEADACDTSLSYAHCIKE  
EGHKVGLYTVSAD

>DponOBP30

LTDKQKELLTQHYNQCVAISKVDQAVLQKARAGDFANDPNLKTHIKCISEKIGFQGTGDK

FRRDVIEKKLKETIPGDNAKNAKLIETCVVANKDPKLQAFNAFKCLYTNAKINLL

>DponOBP6

KITLPPPELQEYVDDLHKLCLEKGGLTENDHQTYNINDKNEKMMCYSYMKCLMLESKWMKS  
GGEIDYDFIETQAYPEVRDLLLSALNKCRTIEEGADLCEKSYNFKCMYEADPVNWWFFV

>DponOBP28

AALTKEEIKERLKAHDKCQADPQTAIDEAALKAFKDSKGGKQLPANMGPHDLCISKAL  
KWQNADGKVNKELIKERITDNVADASKVDAIVNECAVDKENEIATAENLFKCLLKHHATA  
VHGH

>DponOBP26

NPVRTHKLLSKSELHEIATSCLEEVQLSGSIVYNILKTEIFPRDNNKYRDFLACSYKKQGFL  
SEDGTKLLYDNLHFHIFHYGPTTEVQALKHCNLRREDPGFLCFDTMKCIIDALKQLEFDA  
NADIGIETNQVV

>DponOBP22

DQREKAVEFQRGCMEAHGGLLEDELHEIMDGKPIQNEAFYFHFFCVVKKAKLISDNGIVNT  
DHFEENLKDVIDEEHMAHVAALTRKCLIQRDDIFTTIKMAIDCFYSSEHKL

>DponOBP11

HDPHGLDSVHKECHNEVASQHLYLCMAKGLHLVTPEGKVVNVNGVKTHAGHVVSSEAKID  
QIAKECAVDHASTEETVNHLFKCLEEKHVLSLAGHVAPQH HH

>DponOBP29

DLTEEQKQKIVANGKACVADTGADPELIKAARQKGFADDAKLKAFALCMSKKIGFQNEA  
GEIQSDVVQKLGSAIGDNEAAKKLVEKCLVSKGSGEETAIQSFKCYENTPTTHIAVF

>DponOBP19

DFDFSNYKEFEHLAGDQREKAISIFKECMAETGATHEMMEKSVEGDIPDDIVFKNHLVCIG  
KKS GFIDENGLHSKEKLKEKLTLLLGDEGLVDKILDKCFMEKGT PQDTAFELAKCCHKEY  
HN

>DponOBP9

KKNKSNDEEKPKSYKKVFKECQKDETRVDASIIRKLKHKQVDLPANFGDHLKCVFKGI  
GLLKADNTVDEDKLLKISSAKPQKDNVDSIFTECKSSKSTLQETALNLDRCCLTNSIEF

>DponOBP16

YVPNVNNKIRDFCIDDSGVSIEMVENLLANPEKQLIDVESCYLHCIFTEMGLLSENGNVEV  
EKFKSLKASEAPYIDLTCLEEIKSIDHCSEMMILRACHV

>DponOBP27

FLTVPKCLISTGARIKDLHNLATGDSLPESSRCFVKCVGEESGLILDGTLHSEHFEALPMVS  
RLKADVFDARRCIESVQGIKIESCKDIDNLNDCMKIVYRQKYSDSK

>ItypOBP10

YDFSDFSIFNDHLNQIYYTLDNWQHERIRRNAEDVELKCRKPPPPMPKPCAQDSFRDLMD  
KEREVLRDCFKEVVGEEHHPGRSNHPNKFDMFSCEAVEKRKNDIICIKQCLGSKLGLV NK  
DGKLDQAQIGNYVKSTFKNEAWLSPLADQIIGKCLVEAESVAPPKFHIEKLPCKPSVITFK  
HCLDREIQLNCPADQIHNQESCFRNLNHNKDNDFEDEDQPMMGPPDDD

>ItypOBP11

STGDSTMKFILLVIVVGQMGCVFGAMTESQMKA AFKLRNVCQPKNKATDAQIEAMHKG  
DWNQNKNGMCMNCVLNYYKQLPDNSFDW

>ItypOBP12

LQKTNNKCEIPTAAPKKIEDVINTCQDEIKIAILSEALEALNINEHKVSRKRRSTFNDDEKKI  
AGCLLQCVRKMNAVNQYGFPTVDGLVSLYTEGITQKEYVLATLQSVTKCLGKAQKTYD  
IPAQNGTASTACDVAYGVFDCVSEEVAKYCGQTP

>ItypOBP13

KVEMLTDKNEIIKCAMECMQAEIDRLTEERNEHLKCLFESHNAQISETKKKQWCYNCEQ  
DAIYHCCWNTAYCSQTCQQQHWQAEHKKVCRRKRQT

>ItypOBP14

QDFTEEQRKKIIQNRQDCIQETKVNPELIEKADQGEFIDDQALKCFTKCFYLKAGFVNDEG  
EVQKDVVEAKLPPQADKKKALEIVDKCAVKGKDACETVYLIHKCYFEHHPDLPAKAAE  
EKKA

>ItypOBP15

MIQHHRTNSDLTAVKMKILAVLFVICVLFQFTIARNGGNLHYSKISMKKVQKRCQKNEESR  
IDPDVLLKLRKGEEVVQLPDNFPDHVTCLMKGMEYLNDDNTVNEEKVRNMVQRRVTDD  
QDVDAIVGECKAVKTALKETALNINCLRKHELLWNHNFHD

>ItypOBP2

YNFQDEDFXSAVVVRDGRIVDSIDSGPVHPRVRRDQEAATVAEEKCPKRHRRPKLCCAAE  
TLDALHAKKKEITKACFKEVTGLEKQDRHDHGPHFKRFDLFNCKEVEKRKSDMICIDQC  
VGQKKGLLDDSGAPIRDQLIQHLKQHFSNESWFDQTVVEKITSNCLAAAKNATETPIKFST  
EGLKACNPSGITLKHCLFREIQLSCPADQIKDKTACDRFQDRIQKEIEIDDLRLAPDDQQ

>ItypOBP3

RMTEKQLAAAVKLVRNMCLSKEKAKLEEVDKMHEGNWDIDHKTQCYMWCVLSQYKLI  
GKPNHFDRESANIQVDTLPEMHDYVVGCLDKCENAATNFDDKCVAAYEYAKCLYFCN  
PKEYFLP

>ItypOBP4

DLTQQQKDKLLADGKACVAETGVSTDLIQAARQGKFTEDDKLKAFFSCMSKRLGFQND  
GDIQTEVVKQLGGALGDLGVAQAQLVTKCLVPKATPQETAFFSFRYYQNTPTHLTVF

>ItypOBP5

MRQPGGNNKNTQQDYEMWTPSTGYQPSGSNNDNFVTRTRYDGNTRFNRPSSSEECRDQGN  
GNIPRSPFGSSNLPRRQRSSYFNREDDNDNDCISQCVLGYMQLLDTDRSPSETLIKWLQ  
EHVTRNEMDRIKALRDTRKCFGKLVTTDIEDGCEYAKELSKCLELDLE

>ItypOBP6

EEVTTSTKRQLTREKKKIGKTCMLETGVRIETILRAIKEDIPKNDEKYKSYLVCYKKGQ  
YLSEDGGTMLYDNLYSFLQESAGYAKEDLHYIDDCKTITAETPGDLCKKLVGILDGLHK  
VEKNREIDTNTIES

>ItypOBP7

QTDKQKELLAQHYKECLAKSKVNEATLQKARIGQFADDDKLKEHILCVAQKIGFQNSAG  
QFQNVVIETKLREALKGDAAKTKKLISDCAITNPDPKLQAFNAFKCVYQKASINLL

>ItypOBP8

EVSKEELEKLKEIHDTCLTESGVDQSMPEKAFKGEFTDDPKFKEHLLCFHKK

>ItypOBP9

EKKCNSSNCMYDRMLETVGKEFIEQCFCETGVTPEDIRSVMEQNGYGEKQIVFPKMLDK  
ENWYFGKRWSNQYRLY

## CSP Sequences

>CbowCSP1

EKYTTKYDNVDIDSILNSERLIKNYMDCLMERSGCTPEGKELRDNLDPALKTECHKCSBK  
QKEVSKKVLRLVKNKRKEFDELTKGYDPEGVYKNKYKEDLAKEGIIV

>CbowCSP2

DEKKSANVPKYTTKYDNVDLDAIINNDRIFRNYIECCLGKRKCTPDGLELRNHIRDAMD  
NECDKCSETQKKAMKKVGRKLYKEKPEWWKELCDHFDPMKYRTKYQKFIDEALAE  
DK

>CbowCSP3

RPEDKYTTKYDKVDLDAILQNERLLRSYIDCLLDKCKSKDGEELKKILPEALKSKCAK  
NENQKKGAKKVIRYLLKEKRAWWDELEAVYDPEGIYRKYEKELKEEGIQI

>CbowCSP4

GEKYTAKFDNIDYEEILRSERLLKNYIFCLLDKGPCSPDGLGIKNILADALETECSKSDRQ  
KEGSTKVIRFLIENHAGWWKELTEKYDPDGIFMQKYRDQWNSNN

>CbowCSP5

KPAEYTTKYDNVDLDTILKSDRLLKNYVNCLLDKGNCTPDGAELKKVLPDALQTDCSK  
CSDVQKRGSKKIIRYLIDNKAEWYKELEAKYDKNGVYKKKYDKELEDAKV

>CbowCSP6

QTYNTKYDHDVIDSILANKRVLSSYIKCIMDEGPCTSEGREFRKHIFEAITNNCAKCSAQ  
KRIIRKTSRFRIRREPQDWRVSRKYDPQKYTANFNKFLSEN

>CbowCSP7

QNSYSRKYDNVDVDKILKNERVLSNYIKCLLEEGPCTAEGRELKKTLPDALANECEKCNP  
NQKNTAEKVMKHLMSKRARDWERLSKKYDPQGNKYKRYQHLVEKVN

>CbowCSP8

QILSRNNYIQKQLLCTLDRAPCDHLGSQIRDALPEIIGNNCKSCDQRQTANAKRIAVFVQS  
KYPDVWVALVKKYSRLE

>CbowCSP9

MEVSYHLIVCIVVFSYVSEDRFVSTTSLNRVERAVEKYSNKYDKFDVAGVLASARLVKRY  
GDCLMDRGPPEGRFLKDIVPDAIATECSKCNNIQKKQAGLILQHLLLHYRPLFLELCDK  
YDPTGKARKQYGIDTNEADEYEDYDEA

>CbowCSP10

YNTAFDRVNVEDVLKNRLLKRYVDCLLGVPKTCTKDGQLLKDTPNALKTKCEDCSEP  
QRKGAKRVANYLIDCKPKWWSDLAKIYDSGGIYTKQYHDELLAEGINIDGSSKDTEHKTQ  
CYN

>CbowCSP11

MQIKYQDAILVTVVLCIAVTIVNALPQSQAISDEALESTLKD KRYLLRQLKCALGEAPCDP  
VGRRLKSLAPLVIQGSQCTPQEQRQVRKVL SYMQVNFPEWNVKVLKQYSG

>CbowCSP12

MKEGKARKLSQCYSFHGHEQCKYISLKMFLPFVVLSC LITLSISAVPEKSRYTTKYDNINLE  
EIIHNDRLKKNYVDCLLDKGRCTPDGLELKNMPDAIETDCSKCSBKQKEGSEIMMRYLI  
DNKPEYWNPLQEKYDPSGSYKKRYLDAKKTEVSVEPIVKS

>DponCSP10

EEYTSKFDNVDLQILSSDRLLRNYINCLLDKGGKCTPDGIELKKNLPDALENECSKCTPKQ  
RDGAKKVIRYLIENKRDIWDEVAAYDPEGTYKYYKQEQAKKENIKL

>DponCSP9

ETTERPAISDEALEKTLSDKRYLQRQLKCAVGEAPCDPVGRRLKSLAPLVLRGSCPQCTEQ  
EKKQIKKVLAYVQVNFPEWKNMLQTYAG

>DponCSP4

QSSPYTSKYDNVDVVKILKNDRVLTNYIKCLMEEGPCTPEGRELKRTLPDALASGCSKCN  
EKQKSTTEKVIHRLQTRRAKDWDRLSKKYDPEGVYKQKYTAELKTETTA

>DponCSP7

RRVKRSAQTYTTKYDNIDIDQILASNRLKKNYVNCLLDKGGCTQEGKELKKYLPDAIATE  
CSKCSQTQKKIAGRVFQALLNHRDDWELLTNKYDPEGNFQKKYLQEDEDYSBLEEA

>DponCSP5

EVTEKSQYTTKYDNVDINEVHNERLLKKNYVNCLLDGPGPCSPDGLLELKKNMPDAIETDC  
SKCSDKQREGSEAMMRFLIDNKPEYWNPLQEKYDPTGSYKKRYLDAKKAIEVAIQPAEKT  
P

>DponCSP3

EVTEKSQYTTKYDNVDINEVHNERLLKKNYVNCLLDGPGPCSPDGLLELKKNMPDAIETDC  
SKCSDKQREGLEAMMRFLIDNKPEYWNPLQEKYDPTGSYKKRYLDAKRAEVAIQPAEKT  
P

>DponCSP1

EEYTSKFDNVDLQILSSDRLLRNYINCLLEKGGKCTPDGTELKKNLPDALENECSKCTPKQ  
RDGAKKVIRYLIENKRDIWDEVAAYDPEGTYKYYKQEQAKKENIKL

>DponCSP6

KPQEKYTTKYDNIDLDAIIRNDRLLRNYIDCVLGGKCTKDGEELKVHLPDALQSDCSK  
SEAQRNGSRKIITHLLKNKRGWFNELQAKYDPAGNYLSKYSEELRKEGIVI

>DponCSP11

QILNGNVYVEKQLLCALDRAPCDNLGRQIKDALPEIIGKNCKACDNKQLSNAKRIARFVQ  
NKYPNVWNDLVRKYGNPTN

>DponCSP8

DTPKYTTKYDNVDLEEIISDRMLMKNYVNCLLEKGGKCTPDGAELKRVLPDALHTECSKCS  
DSQKKGSRKIMRHLIDNKPEWWTLENKYDKEGAYKKQYREELKKGIGL

>DponCSP2

QTYTSRFDNINIDEILSNKRVLNNYVRCVLDEGPCTAEGRELRTHIPEALRTSCAKCTPSQQ  
KFVRKGANFLIKNDPDQWKRIAKKFDPEGKFAPQFRQFLNA

>ItypCSP1

DKYTSKYDDVDIDQILQSERLLRNYLNCLLDKGRCTPDGAELKKNLPDALENECSKCNES  
QXKGASKVIRYLIDNKRQYWDELAAYDPEGVFFKKYEAIAKKDILLDQIGRA

>ItypCSP4

KPAVKHYASKYDHIDVETILNNPRMVKYYSACLLSQGPCPEGVFVKRILPEALHTNCHRC  
TEKQATVTLRAIKRLKKEYPKIWSQLSQMWDPDVVYVRKFESTFGNRNKIPSVVNNNGW  
DLGSSTTSNADEPRPDTTTHQIITSPNIMSFTTSKTSSTPITTSSTANPSTKTSTTTVGTTPP  
SRPAPIPGLLP

>ItypCSP5



QSPYTSKYDNVDVDKILKNERVLTNYIKCLMEEGPCTPEGRELKRTLDPDALASGCSKCNE  
KQKDTTEK VIRHLMDKRTKDWDRLSKKYDPQGVYKQRFEKELSARKLA

>AcorCSP1

QDNSQGLFLWKYKVDVNTVISSKRLINYNCLLDKGPCTTEANELKKILPNAISTQCKDC  
SITEKQAVGKIFAHLQYHRDLWNELLDKYDPDGTFRKQYELDEDEDYDDEKESN

>AcorCSP2

MPQNRQPQVSEEADRALKDTRYLMRQLKCAVGEAPCDQVGRRLKSLAPLVLRGACPQCS  
PGEVKQIQKVLGYVQKNYPREWNKILQQYAG

>AcorCSP3

GDEKYTTKYDNMDIEHILSNDRLLSKYVQCLLDLAPCTVDGLELKKNMPDALETNCSKC  
SDTQKVSSEKIISYLIDNRPDYWTPLQKKYDPTEEYTKKFIEARKVKAKVST

>AcorCSP4

ADPPGGYYTTRYDHLDIENILNQKRLVHYAAACLEKGPCTPQGTEFKNILPEAIKTNCLR  
CTEKQRIVTTRTIKRLTKEYPDIWGQLEQKWDPTGANVKRLASVNRPRPISGIPSLADRF  
GNEDQNNLGEITRSTSSSTIGGGISSTSSSVSPSSTGSSSSSSATTTTTTTTTTTTTTRP  
PTTFRTIYKPV TARPFNSIGPNLMILNPKVIIDKVLTYTADAVLNTVSGVLKG

>AcorCSP5

QNRYTTRYDSIDVDSILSNRRILTNYLKCLMDEGPCTNEGRELKRTLDPDALANGCSKCNE  
KQKSSAEK VIRHLIKNRSNDWKRLTAKYDPSGQYRKKYEAQYNIKA

>AgamCSP1

QDKYTSKYDNINVDIEILKSDRLFGNYYKCLLDQGRCTPDGNELKRILPDALQTNCEKCSE  
KQRDGAIKVINYLQNRKDQWDVLQKKFDPENKYLEKYRGQAQKEGIKLD

>AgamCSP2

QEYTTKYDGDLDIEILKSDRLFNNYFKCLMDEGRCTPDGNELKKILPEALQTNCEKCSE  
KQRSGAIKVINYVIENRKEQWDALQKKYDPENLYVEKYREEAKKEGIKLE

>AgamCSP3

QDKYTTKYDGVLDIEILKSDRLFNNYKCLMDTGRCTPDGNELKRILPDALKTDCAKCS  
EKQKSGTEKVINYLIDNRKDQWENLQKKYDPENIYVNKYREDAKKKGINL

>AgamCSP4

ETANETYVTKYDNIDLEEIFSSKRLMDNYMNLKNVGPCTPDGRELKDNLPDALMSDCV  
KCSEKQRIGSDKVIKIFIVANRPDDFAILEQLYDPTGEYRRKYMQSDALAEHVKQEDRDLSS  
SGDGDADTETE AHATEHNSQDHDHREGQSDAE

>AgamCSP5

QEVARTLYSTRYDNLDIDTILASNRLVTNYVDCLLSRKPCPPEGKDLKRILPEALRTKARC  
SPIQKENALKIITRLYDYDPDQYRALRERWDPGSEYHRRFEEYLRGLQFNQIGGSNGGSGV  
GNTVLSNL

>AgamCSP6

QKYTDKFDNIDVDRVLSNDRILNNYLKCLLDKGPCTQEGRELKRTLDPALKTNCEKCSEK  
QRTSSRKVIAHLEERKPQEWKLLDKYDPEGIYKSKFEKINKRS

>AgamCSP7

NDSQNINRLLNNQVIVSRQIMCVLEKSPCDQLGRQLKAALPEVIQRNCRNCSPQQAQNAQ  
KLTNLFQTRYPEVWAMLIRKYGAV

>AgamCSP8

DPSGSTCAAEEATTARTQVSDEALDKALSDKRYLMRQLKCALGEVACDPVGKRLKSLAPF  
VLRGACPQCTPAEMNQIKKTLAHLQRNFPSEWNKLVQTYAG

>BmorCSP1

DDKYTDKYDKINLQEILENKRLLESYMDCVLGKGKCTPEGKELKDHLQEALETGCEKCT  
EAQEKGAEYSIDYLIKNELEIWKELTAHFDPDGKWRKKYEDRAKAKGVIPE

>BmorCSP2

QDKYEPIDDSFDASEVLSNERLLKSYTKCLLNQGPCTAELKKIKDKIPEALETHCAKCTDK  
QKQMAKQLAQGIKKTHPPELWDEFITFYDPQGKYQTSFKDFLES

>BmorCSP3

ADLSKYENFDVEPIVTSRLLKAYINCFLDKGRCTPEASDFKKALPDTIATNCGKCTEKQK  
ANVRKVIKVIQQKHSTEWELVKKHDPGSKHRADFDKFLLS

>BmorCSP4

TETSTYTTQYDEVDIKEIMGNERLLVAYIGCLLDKNPCTPEGKELKRNPDALQSDCSKCS  
DKQRENADAWIEFMIDNRPEDWTKLEERYNPDGSYRTKYLEGKHNATSNVDESK

>BmorCSP6

EKYTDKYDNIDVDEILENRKLLVPYIKCVLDEGRCTPDGKELKAHIKDGMQTACAKCTDK  
QKVSARKIVKHIKQHEADYWEQMKAKEYDPKDEFKEIYEGFLAGQN

>BmorCSP7

RPKTPFDNINIEEIFENRRLLLGYINCILERNCTRAGKDLKSSLKNVLEENCDKCEDQRK  
SIIKVINYLVSSEPESWNQLKSKYDPEGKYLIKYEAKMESN

>BmorCSP8

RPDDKYTDRYDNVNLDEVLSNSRLLQPYIKCILDKDRCAPDAKELKEHIREALETECAKC  
TEAQKKGTRRVIGHLINNESKSWNELTAKYDPENKFTAKYKELREIKA

>BmorCSP9

RPEQYTDKYDVTVDLQQLISNRLLIPYVHCILEKGQCTAEGKELKSHIKEALETNCAKCTK  
AQKGGTEKMIGHLINHEAEFWEELKAKYDPTNEFTKKYETELKRVT

>BmorCSP10

DYLDVDDIFRNKRLVRNYVDCLINAQRCTPEGKALKRILPEALRTKRCIRCTERQKRTSVKV  
IRRLKNEYPEEWAKLASRWDPTGDFTRYFEDYLAKEHFNTIPGSGL

>BmorCSP11

QLVGNLRLLLKNYAKCFLDQGPCTAEGTEFKKRIPEALRTKCAKCNPKQRHLIRTVVKAFQ  
TKLPDLWEELAIKEDPKGQYKHEFTAFINAMD

>BmorCSP12

SLKAFIGCFLETSPCDAVSGDFKKDIPEAVAEACGKCTPAQKHLFKRFLEVVKDKLPQEYE  
AFKTKYDPQGKHFDALLSAVANS

>BmorCSP13

VDEIIDNPRLLKAYTFCFNDKGKCTAEGNDFKKWIPESLQTSCKGKCEKQKYLVAKFVHAI  
KDKMPDEFDILRKLHDPKGEYTENLDKFLETYGH

>BmorCSP14

EILESNRLLKGYVDCLLGKGRCTPDGKALKETLPDALEHECVKCTGKQKSGADKVIHRLV  
NKRPLWKELAVKYDPDNIYQARYKDKIDAVKGS

>BmorCSP15

ENDRILQSYTNCFLDKGPCTPDAKEFKKVIPEALETTGKGCSPKQKQLIKTVIKAVIERHPE  
AWEELVNKYDKDRKFRPSFDKFINEDD

>BmorCSP17

NDRILLGYFKCVMDRGPCTKDGGKTFKRALPEALPTACARCSNKQKAAFRTLLLAIARSE  
PSFLELLDKYDPSRSNRELLYTFLATGL

>BmorCSP18

DKLFTDYINCMLDKGPCEVEYSSEFKELLPEVIATSCAKCTPIQKTGLRKTVKALSVKRPD  
DFSQFRAKYDPKGEYEKQFAAFVVATD

>BmorCSP19

FLCLIFLPHYALNQKYYSRYDYDIDHLVQNPRLLKKYLDCFLGKGPCTPIGRLFKQVMPE  
VITTACAKCTPTQKRFARKTFNAFRRYFPETLMELRRKFDPESKYYDAFEKVITNA

>BmorCSP20

NDKRFIQRQLKCALGEAPCDPIGKRLKTLAPLVLRGACPQCSPQETKQIQKTLASYVQRNFP  
QHWAKLVRQYAG

>BmorCSP21

GTMQRHLRCALGEGPCDMVGRRLRTLAPFVLRGACPQCSVQESRHIRRTLAYIQRNYPW  
EWARIVRQYG

>BmorCSP23

GECAPDAKELKIKLSTAKHLSIESIETVCAKCTEAQKKGARRVVITVGSGLSLPLALMKSM  
GDGNHSPSGGPSVVSES

>TcasCSP1

QLTRISDEAIESTLNDRRYLLRQLKCATGEAPCDPVGRRLKSLAPLVLRGSCPQCTPQEMK  
QIQKVLAFVQKNYPKEWNKILHQYAG

>TcasCSP2

ATYDVYPTKYDNVDIDAILHNKRLFDNYLQCLLKKGKCNEEAAILRDVIPDALITGCRKC  
NDHQKVSVEKVIRFLIKERNSDWQQLISVYDPKGEYQTQYAHYLEKI

>TcasCSP3

ASVPYETVDIDKLLADDKMVTEYMACLRGEGPCNPAEKDLEEHIPLVLGNYCADCNDKQ  
KNFVIKLATFVIKRNRFDEWRQVQKRFDPDLSHADDFNKFILGS

>TcasCSP4

EDTTHKYTTKYDNIDLENVVKNERLLKSYVDCLLEKGRCPDGLLELKKNMPDAIETDCS  
KCSEKQKEGSDFIMRYLIDNKP DYWKALEAKYDPDGTYYKKRYFESQKDEVSKVEA

>TcasCSP5

KTLHRSTRDDKYTTRYDNVDVDRILHSKRLLLNYINCLLEKGPCSPEGRELKILPDALVT  
NCSKCSEVQKKQAGKILTFVLLNYRNEWNQLVAKYDPDGIYRKQYEIDDDYDYSELDSA  
KK

>TcasCSP6

APAEFYESRYDHLDVESILNNRRMVNYAAACLLSKGPCPPQGVDLKRVLPEALQTNCAKC  
TEKQRTAAYRSIKRLKKEYPKIWEQLRAVWDPDDVFIRKFETSFESGKPSGVISTNTSPPSPI  
LSNRFGENEEADAASNVISSTPLPPTTSTTRTTLTKFTTKPSTKPTNKPVVTKPPQAPPF  
ATVGANLQATVSFGTNLVGGIVRSLGTLGSRVVESGTKLANMVISAAIRP

>TcasCSP7

AENKYTNKYDNVDVDKILNNDRVLTNYIKCLMDEGPCTSEGRELKKTLPDALSSGCTKC

NQKQKETAEKVIRHLTQKRARDWERLSKKYDPQGQYKKRYEEHVATSRAA

>TcasCSP8

QLGLAGNNYIEKQLLCALDKAPCDALGNQIKGALPEIIGKNCERCDSRQVANARRIARYV  
QTKHPDVWNALVKKYSV

>TcasCSP9

QEYLVPQNIDVDEILKNDRLTRNYLDCVLGKGKCTPEGEELKKDIPEALQNGCAKCNEKH  
KEGVRKVIHHLIENKPNWWQELESKFDPQGEYKKKYDELKKEGLAN

>TcasCSP10

KNYFNCLMERTCSPDGEELKKALPDALHSGCSKCTEKQKEGSRKIIHYLIDNKRDDWN  
ELEAKYDKDGVYRQKYKDVIEKEGIKL

>TcasCSP11

NYVNCLEKKGKCTPDGAELKRHLPDALHTECSKCSSETQKNGSKKIMRHLIDHKRDWWN  
ELEEKYDKEGEYRKKYEAIEKGGKD

>TcasCSP12

YVNCLLDRGKCSPDGQELKNNLADALQTSCSKCSQRQKDGSRTIIRYLIKNKRDDWWN  
EAKYDPTGIYKNKYADELKAEGIVL

>TcasCSP13

ECLLGTGKCTPSGEELKKDIPDALKNECAKCNDKHKEGIRKVIHYLVKQKPEWWEQLQK  
KFDPQGIYKKRYQNYLDKEGLKA

>TcasCSP14

DCILGKGKCTPEGEELKRDIPALQNECAKCNEKHKEGVRKVLHHLIKNKNWWQELEA  
KFDPKGEYKQKYNKLEKEGLQA

>TcasCSP15

VLDKGKCTKEAEKLLKGGITETMKNCGVKCEQKQKEDVHKVFQHLMIHRPNWWHELET  
KFNPHHEIKLQHLHQSKFNPHEEVKLQHLHQFPHHDFLEREGFIR

>TcasCSP17

DCILEKGKCTPEGEELKKDIPDALQNECAKCNEKHKEGVRKVIHHLIKNKNPSWWQELQEK  
YDPKGEYKSRYNHFLEEEGLN

>TcasCSP18

NCLLDKGRCTPEGKKLKSTIPEALSTDAKCNKVKANVRKVLHHLIDNKPDMWKQLEA  
KYDPSGEYRSKYKDELEKNGIHV

>TcasCSP19

FNCIMDRGACTPDADELKRVLPDALKSDCAKCSKQKEMTKKVIHFLSHNKQMQWKELT  
AKYDPDGIYFEKYKDKFDS

>TcasCSP20

KEILQSDRLTENYVNCLEKPKCTPDGEELKRVLPDALKTSCAKCTDKQKQGAKTVIQHL  
YKNKQDWWKQLEAKYDPEHTYVKAHEDELKAL

>AmelCSP1

EELYSDKYDYVNIDEILANDRLRNQYYDCFIDAGSCLTPDSVFFKSHITEAFQTQCKKCTEI  
QKQNLDKLAEWFTTNEPEKWNHFVEIMIKKKDEGA

>AmelCSP2

ETEEGQSGRSRVSDEQLNMALSDQRYLRRQLKCALGEAPCDPVGRRLKSLAPLVLRGACP  
QCSPEETRQIKKVLSHIQRTYYPKEWSKIVQQYAGVS

>AmelCSP3

RPDESYTSKFDNINVDEILHSDRLLNNYFKCLMDEGRCTAEGNELKRVLPDALATDCKKC  
TDKQREVIKKVIKFLVENKPELWDSLANKYDPDKKYRVKFEEEAKKLGINV

>AmelCSP4

EDKYTTKYDNDVIDVVLNTERLLNAYVNCLLDQGPCTPDAAELKRNLPDALENECSPCSE  
KQKKIADKVVQFLIDNKPEIWVLEAKYDPTGAYKQHLYLQNRVKEESY

>AmelCSP5

QDDISKFLKDRPYVQKQLHCILDRGHCDVIGKKIKELLPEVLNNHCNRCTSRQIGIANTLIP  
FMQQNYPYEWQLILRRYKIMKYY

>AmelCSP6

EDYTTKYDDMDIDRILQNGRILTNYIKCMLDEGPCTNEGRELKKILPDALSTGCNKCNEK  
QKHTANKVVNYLKTTRPKDWERLSAKYDSTGEYKKRYEHGLQFAKNN

### OR sequences

>CbowOR1

MIGFLKRQTLVDKLIHVTFFFILILDVLLIVKISTTHNKTLEDIMTSYEAVGSYLQMTTKIL  
TLIIYNGDLKQILAMTNQFWKYDKFGPVISNKQKQYPRMMPSFITAYFFFCICTLTVMLK  
PVLFHLPSCCIPEGEVWFYVVSIAIQNETLFYCTFTVFAFDAMFALLYTEAAMQFCLLNE  
AFSRMKNHGDLEKCVDYHVFLYNFVKKLNDVYWMFLLVQSFDCLETCFQLLTMVHTQ  
ENLTLRVKAVLYAIALYMQLSFFCFPVGFLQDESQASSTAISACPWYLKDAKFKRSVFIVMI  
RAQKKISVRAGGFFEMDRQAFIYLCKSSFSVYTLLKSIN

>CbowORco

MMKFKVSGLVADLMPNIRLIQASGHFMFNYHADNSGALHALRLGYSCMHLVFCFLFQFGC  
TFGNLVVERDNDVNDLAANTITVLFTHCITKVFYFAVRSKLFYRTLGIWNQANSHPLFVES  
NNRYHALALKKMRTLLVCVMATTVLSASAWTGITFVGDSIHHIKDPDNENETIIEEIPRLV  
KSWYPWDAMSGTAYYASLIFIYVFFSLAHANLMDSLFCSWLIFACEQLQHLKEIMKPL  
MELSASLDTYVPKSADLFRAPSANSQDNLIENDYNAKNEEINLKGIYNTRQELGINFRSGA  
LQTFGQGGGGVGNGLSCKQELMVRSAIKYWVERHKKHVRLVTAIGDAYGVALLLHML  
TSTVMLTLLAYQATQIGGVNKYAATVIGYLVYSLAQVFHFCIFGNRLIESSSVMEAAAYSC  
HWYDGSSEAKTFVQIVCQCQKAMSISGAKFFTISLDLFAVVGAVVTYFMVLVQLK

>CbowOR3

MATITNSLFFVILEIGICIKFLPFKNDPKKIRKTLFALNQDMFNRATESQRRFIEETEAAACRNI  
FAIFMTFCLLSLFSWPIKVLVFEQRRFPIDVWLPFDPFENVSIYLGVFAYLFIATGNAPIGNA  
AIDTLIAGLIIHAACQFRILKDNLRCLSQRADKLNGLPQELKEMKRNEIVYRNIRECILHY  
DAIYDFVKEVEKTFSVVIFSQFAVSILVICISCFQLSIAEPLTITFFAMVIYVVSLLLEIFLYCYY  
GTVLYEESNTLIAAIFDSEWYDLDEKSKKALFILMERAKRPMMLTTGKLLSVSLETWTMII  
RRSYLLAVLKNHQ

>CbowOR4

MLFYVCGFAVVICEYMMFKESIKDIGKFSHIGMVLTHLAGIVKFCLLTIGHGKILKLMHV  
LQNKDYQYCSLEDSKPGEVLRKGGQTVNNVIAYSTFVMTLVGITGHISVRNLNEQIKGD  
NFEGTNKTCYDFLPYMFYIPISETKWQCEMVFNLMDIGFALHAFVIAAHDGIFAGLLICL  
KSQLLIVCDVYKTIRQSLKNMHLPENYTITNDMENPALENEMYRLLVHSMELKILLVW  
RDELEYIFTMVVLTQTVASLFIASNFYVASTILTASLEFFAKLEYTFCIFFQLSLICWFGDDI

TRASDLIKLSLYESDWLSSSPRFKHAMVLTMIRMQRPVFLSIGKFTPITLSTLVAVCRGSFSY  
FALFKSIQK

>CbowOR5

MIKMIQIRFHTLGFLACMKIFMLSFGQLLSTLPLKCYSAKWIPFHVWVWFYQSFLTSSVCII  
MPIIAMDLLLMTFISLTHIQFKMLNLEIDRVFRRSERAKKSEIARLVDHHNFLIDFSNRINNT  
FSTMLLAYIFVVISMCVEMYKSSANPSFSVFMNAVTYLSAAVFGFLIFLFCIPGQNLTDAN  
NIPNAVYFTDWRDQSKQSTSVLMMISNGQRDISIKAGEVIKINLATSLSSTIKTLLSYFMFLR  
TVVLDE

>CbowOR6

MYTIKKSQPFYSSLRTLRFLLVYREFVQKSTFMLLSFFSSFMSFSAFLVFCGILHAVMSIR  
ENIGGDISEDLSVSIGGLAMMVNVAMFKYHQDKWSNFFKDVTFEKFQKPTDFDATKDR  
ANLLSTLYMIYCITGTIVYSCVGVIESSCDELSEETKQKVICGTLAPIWLPFEDVSLTVRNTI  
LLVQYVLANYIITPSAVICFLPFETTELLICHINFLKDKLLKVFQGNEDGMIRNDKLRFCVAYH  
THILGMADQLKYVVKFSVGHMSLVCALVFGCIGNQIFRAKPVGAVIFLLGYMVSLFLLCY  
AGQRIMNESLSIVDVIYNSKWYKGNQTIKKNVRFMMARCQIPVTLDAWPFQIFSFPLFMM  
IVKTSYSYLTLLRQST

>CbowOR7

MISPTSYLKLIIFKSKSVHVLEMLSFELETFNNYPKGLSGIVERTVKFSRYLGYAYQFMCC  
LVITLYSTIPLFTKADLPIRFSHDVVGKLPVAVYIFQVIGLSSAASNNSCLDVLAMSLMGICSA  
QIDILNKKLITLGNEDDEDETDGSNNSYLRLKCKAKHHVEIIRFQKALERVSSIFLAQFATS  
VMVICNIGFQLVHVQPASVQFALMLFYFIAMNTQLVMYCWYGNIEIIVKVYHCLLSAIR  
DACYKFEWFDSNMETKLLLLIIMEHSSKHLYLTAGKISVLSLESFTSVMRTSYSYFALLQT  
LYRNNQD

>CbowOR8

LPFDPFQNVWTTYGVFLFIFLGVASAGVGTTPVDTLIVGLINHAAGQIKIKNLEHLDHDT  
NKVLNEYRYISANQREILKNKMIYKRITNCVIHYDAVYVMVKDLEDYSSVIFAQLSASVL  
ILCITCLQIINVEPLSVPFAMCTYVFSMTAQIFLYCYFGTILFEESDSVIK

>CbowOR9

MLTFSLIHITSLVQVSETLSFNLTQLAYLCKLLNFQIHSKRLELEDFLRKTTLTNVTVEEEA  
IIRNTMKGSRRLATVYRSLCVIIVFLYALFPLIDENSGDEKLLPLPMWFPFDTNNHFGKVWF  
FEIFSAIGAWTNSNLDVICVTMITLTTCCQFNIMNSRLSNLRKSTDDVEEEDTVQKALKECV  
IHYNDIISFQILVETTFSLIFGQFVFSVLVICMTGFQMLVISFKSVQFVLLLSYLLGQTCQIV  
MYCWYQGSILDSSEAINDACYSSEWFNCSETQKMFLIIMERSKRPVKMRAGKFFFLNLD  
TLMSILKSSYSYFAVLRHIYSSKFT

>CbowOR10

MMVKQTKNEAKRFFRYIGMLFTPTQALGCYVLLRIKQHGIEKVREELLDEQFHYKSCGSF  
RPGKIFNDAKSFCDKFVVITILYSLVVAHAHISAYVTLNLAFEGEYFPANITCYDFMPNYFV  
IPFPTPKSSCKNALTMDVSLNVYATLLASYDTTFCVSLICFKTKLQILSGAMRSMRERV  
TEMNPLNSSLLEDDPEVEAKLYEEIKQCARHLESLLSVCKQIEDIFKYGTLMQIVNALVII  
SSCMFVLSITPQSDPFFVMIHYIIFVQLFTVCYFGNEITEVADELNNSLYQSNWLSCK  
RHKQCMIIIMSRMQKKIHMIGKFSPLTMNMFVAVVKGALS YCAVFRVDNAEI

>CbowOR11

MGAVKVLFFYFRGDKLIKIMATLESTDHLYEKQKRKFFPGSISTNYKKVGIKYTLLFFML  
AHATLISSYIPPTIAAIQSELDNPGKSLPDRLPYYSWMPFKFDTSTTYLIALGYQAIPMFSYA

YSIVGMDTLFMNIMNCIGMNLEIIQGAFSLRERAADKIAGPLMTQDGLHNSHELKTALN  
REMKKVCRHLQIIYRLCEDLENVHTFLTLAQT VATL FILCSCLYLVSTTPASSKQFLSEIVYM  
VAMGFQLILYCWFNEVTLKADMIPFFIWQSDWISADREFKHAMIFTMIRAKRQLHLTAG  
KFAPLTLTTFIAIIKASYSFYAVIKNTST

>CbowOR13

MDYGYPKNFFEANDVVKRISGIMLLQGKEDNIFFKWYQIIYIIFVYSSTVVFTVGVQYIMTK  
NSVNKISNLVSSLGVLTTTHVGHFKFWLLS KKKELLENLKN DIEGENYQYATIGNSNPGLL  
LTNEKKFCTVCTYVYLAGCYLIGIFGNITTVVRLNGALTGNNTFESINMTCNDFASFTFYIP  
FFTANKWQCIISSTVMYSGMAFESGIHAACDLLFFAMIHCLKIQLRIIADVFR TIRRRSLLKL  
NVPEDYTVLHDEENSALEEELRQLSHSTEHLNILLRVTQEIEHLFTYVLLAQTLSLLIVA  
SFLYLSTISINDADFFLQMQLLVILIQALLCWSGNEITEGFQLIKTALYESDWLSCSHRF  
KRSMILTMIRLQRPVLLTLGGFSPLTLATLVGVCQGSFSYFTLFKSFQ

>CbowOR14

MATEFQKAFETEKWILSLFGFYQPWNPEPLWKHARRVFCIAVTLTYIISMCTGPFLENSVM  
LCTVMGLSKMVQLLTSKRQFREIEHYISNMKPSIIRRSSLIGAFRVSVVTLVGLGIMPLSM  
KNQRMLPYKSWLPYSVEGASPYYSTFIFEVISIVMAAFTNSTIDMMYYCLVDICCAELDVL  
KLNIEIDMSDHVDIVEDELKKIVIHKKIIRLVGIIQEIFSSVVFVQCMASVLVICFLGFQLIY  
VDKLPVSKALIELSFIACMLIQIFCYCWFHNTMKSSSEVGDICYHTKWFESDLMIRKIILII  
MERCCKPVELRAKIFTLNLQTLAILRSSYSYMAILRTLYTDE

>CbowOR15

MKEVHFKNTVLFYEFYNTDFKLLKFFGIWIPDSSNSKFHKEYFIVINVFCAIFNLAQVSN  
LLHEINNLKNLAACGYVVAIACMANVRSYYFLKNREEFLYLIRSLNDSHFQPESEDQICSA  
KKSRLFYSKVMIVSILCTITVFISMSTPVFYKKNELNLPASWYPFDVSSYPIYQIAYVHQ  
CISVIYVTSINTYVDIIMAGFNFIGIQCDLLCSRLYNISKDHSSEENETLLDCIRHHKLIVR  
FANNTEILFNRIYLGQFIACALCMALFLLTLHQESRFESSFLVYFYLTAIFSLLFPCWFSSE  
MQGKSENIPAAAYSCNWTASKLFFKDLIFFILRAQKPLKFYAVGFFQISVETFLIVRSSFS  
YYTVLNNMIMKEG

>CbowOR16

MDIVVLTLSLTAIQFKLLNKGVAKIFKGITNLEQADVIRERIQKYKNHHAFLMTFRNELN  
NLFNAILAYMGVIITTQCTELYVLFSWNSIQEGIRAVLYASTMFFELYICYCLPAQDLIDEA  
EKLPSIYCSKWYQPNHFKDVL LLLGQFQLNMLISAGGVAILD IQTGFAALKSMVSYFAF  
LRTVGASSEK

>CbowOR17

MNIEHIKEIEVLENSLKFLRIFFLPRKSEINDPKKNVYWKFILLSLSTAYFSIGAAIHLVVNV  
RSGAFVNVDKDVGTIISYYGALYFISRYLGNIKYIILYKQFSDFKTYGLPNNFEKTNKLLN  
KFSKIYFVYHMFIVTGM TTTSTLLTIGTCEEENLENNINDICGLVGPTWLPFEFDYFPLKQIV  
YGYQVYCSFVIFQLAGHLSYTLMESVEHLIRFEHVGHTFVEALNEKNSYTRREKFYVAIQ  
YHNDVIQMGKLLNSCFAPSLIVHISLTGPVLGVAGYRFLTEIPLDSTCLFFGWMFSTFIVCR  
GGQRLSEASLAVGDVIYRVNWNYNLETDLQRDLKMVMLRSRKPVYLRAGPFGPMTYSTIV  
TILKTCYSYITLLKQTM

>CbowOR18

LGVDVLVLSVCACVVQYKILEYLFNFNTPRMVEINEMFEKMGEEVNSSYDAQKKYLV  
RCIELHQIVLRVTRNINKALSSIQFLQLSSSATSIGVGLFQLTKGSSSTFFQYTMASAYIFANL  
MQLLIFCSVGNELYYQASLLPQSIFLSNWSSESSVELRKDILIVLQKSQQVPEL

>CbowOR19

MFRVGDAlAFQSTINYMTFFKVFTVQTDTRYVGTILRFWSFCLICLFNTFHLVYVKIENIDV  
DTSIDLVLGGMGILLICIFSASSRRWTSFLHNLIDFEKYGKPDGIEHAIERGNYWAHFF  
GLYYIIGTVIYGIVTYMEAPSCHRLNNEKNLHLICDTFVAIWLPFDIPLKSIRLSVFFIQFVLI  
TCNVNPAAMACFLTWECTEILRCHLRHLKHKHFHKMVKEGDVRKRPDGGIGYWIRYHNHIL  
SLSYELKSLFKISVGHSTLISGLVIGCTENQILKSKPLGASLFFLGWMAAMMLLCHAGEIL  
MEETLSVADTLRDSQWYLADLETRRDMVFIMLRSQKPVHLEAMPLGVMNYALFVMILRT  
SYSFMTLLNQSS

>CbowOR20

MRDVEEAESLMVTGWFPFDTREYFAVAYLFQLQIAIIGGLFLVALDSLIIISLIMVAPLRLKV  
LANYFRHFGDKKSMNSLLSLKNLISEHQIIRYVEDLNASLKWFLADFVVKSYNISIVLS  
NAVSIYEFNRNIVIIYYVLQTRGRNKSELAFSALFLCFLLSQLYCFYFHANEILLESTNLAENI  
FKSKWYEQNSQIKRSLIIVMIRSQKPLQITIGDLHAIENILFVKIVKAAYTFLLFQYLGL

>CbowOR21

MKTQFQKAFQKEKWILTSLSGYPQWEPEALWQHCRFFCMTVSITYITLMCTGPLENSI  
MILCTVMGVVKEMQLLFSKQFREIEEYIGSMKPKIPIRLLGSFRNSVVTVIIIFLGLMPY  
TKRSLRMLPYKSWLPYDVSRAVYVYVTFVAEVLTIIMAAFTNTTIDVLYYCLIDICCAELD  
LLKMEIDMSSESYEVVQNKLNKVVYHQRIIRLVEVIQDVFSSVVFICMSTVLVICFLG  
FQIVYVDEIPSGKATIEVSFIGCMLLQIFSQCWFGQSIMMKSLEVADVVCYNSNWDADLRI  
RKMIFIIMERCKQPLELRAKIITINLQTLAILRSSYSYMAILRTLYSD

>CbowOR22

MSSFSESPENEEQPFSAATKMMRLLCVYPLGFQKQMVRFYVNVVVVKLFSFFFCCVLCL  
LHLVMTKIDGAHKADLSEDSMIMAGTGMLATNLLFAYKVKKWNLSLGMKVADSPEMRN  
IQNFEAIKKRCNRLARLFTMYCVIGAGIYLLSGYYESLVCIRKNEENGNEICRTLMPVWL  
PFRLSSAAELTLFALQAFAGINLSLPGANMPFLVWEITEMISLRISHLKKISESIVVEKNIKSR  
QERLKHVMMSHQIIECISLLNEQVRLCFGHISTIAALVLGCLANQAINSVHLGAMAELGG  
WMVGLFLLCSSGQKITDITESVAEAIYAMEWYSTDVQTMRDIFILMRSQKPLVLQAGPL  
GALNYPLYMMMVKASYTYLTLANTI

>CbowOR24

MMTEKDEKMPKLEIVCMPTSIRIFRFYCAFPPSDKLLNPGKMFYIRFALIALFSSVVLVGS  
TMHLIKNVKDRTYNHIELDFTYIVSNLAGYLLCSYFTKVNAAVQLYLILSDFEFGKPINF  
DNTNKKFNKYAKYQCYLESITVCILLGSNMFRGAQCRKDNAELDQHEVCGLFAYTWLP  
FDIDFFPVKQIYLACQLFGIHYVMMAGLASWMVLESVEHIATRLRHVSHFFNEALKEAE  
QRKRREKFNFAVRYHVAVLDLESKLNQTFVFMFTHMVMMSGIIMGYGVYSYMKGKNVST  
ILIATGWLIGLLMDCYSQRIQDESTLVGTALYDADWSDADDELKRDIRFVMMRCQKPMI  
VQATSFQIMDHPLFLAVLKATYSYVTLLSQSDL

>CbowOR26

MKHKKLYNFYTIFCTSVWVTFILSQLVYMSSFSNMDEMTSIIYVAGTVIDLVKMLAIYS  
NMDRIKPLNLDLNNPLFQPKCKEHVELALAVKKFHSRLFYFCLYFGVQTYICFSAIPFILEE  
NVTLTQGWFPIDWTYSPNYEIVYAFQNVILWNTLIFLNLDTFTSGLLMQVGLQCDLSTTF  
NKIDAFHVSSGVLIENGEQMALS LKDNHEFFNRVMTENLIVCVKHRYKIRRLATEIEDIHHI  
SVFILFLGGAIICADLFQLSIVQTGGVEFVLFVSFLMCMLEQFMYCWFQNEIIFKSDNIFA  
ASYNTPWLDCDLKFRKILLNFMTQSIDPIGLKAGGLFTMSIKAFVSVLKSAYSFTLLQRIQ  
EKECSELN



>CbowOR27

MIPSEDNSLSSMWLTKLILKSIFMWPDDYSDTKRKTFYKISMTICLFIQSGLVLNLTQNYHD  
WEKNLAVVSSMSTIFQTVFKMTALYQNSDHIFVLMCMCRKFWPHNLDNENSEYIFKQS  
HSRRMRLMVFLASGFLFSLGSVISPMFTRDTPFKSDYPFNWRRSPFYELIYLIQVAANGY  
LINMTVIGFDLFDMDICAAALTNQYVLLGSCFERLGTENMQDFYARIRERGCQKWPPKVG  
ARRFLGICVQHHQLLTQITKVVGHIFNVVAFLQLCSSVVAICVSGFIATKDDVTTSQIATMG  
SYLIGHLIQLYIYCSVGNELLFQSSTLTNHIFGNSWYNLDSTTTKKDIIFIMKKAQIPAKLNA  
FKVFPLNFATFIADVRLSFSSYTLLTSITNK

>CbowOR28

MYASNLDWCLKNFLLGVHPAKQKSFTQTLQYLFHIFGSCAIMILTVLLLYYKEDAVSMKD  
ITDVSTNFTMFPHGMIKLTTLTYMKRAEILDLLRRTKEHFWQIKDDREDVKRSYKLAKLLK  
NLFFNSVVLFIISAIVKPIIIGGNTLTYKCHKPELIPRWLFLIFQDAMCVAILFTLSCTDVLILT  
LLILTQIQFRMLNEKIQTIHDFHDLRKECVDHQNFLMDFVDRFSKVFSKTILLFIGNII  
LSLCMCMYIITTESANINVQMEALFHLAGLNEICLCYSIPAQTLMNEADEVGKNAYFSKW  
YEHPKDAKLILQIMIRDQKRMVITAGDFVRIDMEMFLTACTIVSYCMFLRTMSMVDQ

>CbowOR29

MTCNEFASFTFYIPFFTATKWQCIISSTAMYSGLMFEAGIHAVHDGIFGLIYCSKIQLQIIGD  
VFRIRQRSLSKLNIPEDYSVLHDEENPALEEELRQLSHSTDHLKILLRVQDEIKKLFTYVL  
LAQIISMLFTLASFLYLVSTISINDPGLFLQFFWFMTILLQLTLFCWSGNGITEGFDSENTALY  
ESEWLSCSRRFKKSMILTMTRLQRPVLLSLGGFSPPLTLATLVGVCQGSFSYFTLFQSYQ

>CbowOR30

LIRVSIITGFFYGGLALSQNLINMFVSLGEGEIHIVTATYLSLTNIFS VVKVLIIFVNRKITT  
VEKINKKEFQPKTKNQREILEGYIKLSKNVTSILIGISSACLFWAVYPFTVEGGPFLPLAAY  
VPYETVSWPIFGITYVSEMIGIVISAFCTNADSLITALIMVCAQLELLNDSLKTIGEHSKI  
ELKK

>CbowOR31

MMAFGYPKNFFHMNEATVRFLGVWLPSKHHILIRLLHPFYFIFVYSTLIYFVIGQYMKVE  
MKNVTTHISSLAVLLTTHAGHVKGSVLFVGGRRIQEIKDILQDVNYQYYPVGEVNPSTFQ  
KEKTFYTMLSYALLVGFMPGASGTVTTASRLMIEMKGNNTFESIDKNCNDFITYTFYVPI  
FIETKWECISSSLMYSGMTMYEGIAHAAHDGLLAGLLICLKTQLLILGDIFRTLQRVLSR  
LNIPEDYSVIHDEENPALEEEMYRQLCLCTEHLKILLTARDKIEKTFTYMLLMQTIASFPVF  
ASSLYAASQTPLSSTDFYTNIDFFGCVLVQLAMFCWFGNGITEAGEAIRSALYEGDWYSCS  
PRFKKSMILTMTRMQRPVYLSIGRFSPLTITTLVSVCCQGSFSYFTLFKSL

>CbowOR32

MEEDQKIYHFKTLKYILILMGQWKFRNRSRFFIKLYELIISRLVVAYLILSAHMFLINVAFAW  
DCKARVMEMLTAYMQNLNVIIVTLIMRSQRMRNVRLRYVQHYENIKLKDENIAVRDIYMQ  
YVSINHKICRLLIGVVVFTALFYFATGMRNSFLISSTECPMMKGIMFQLWYPMDTKKYFY  
LVVLNDNLIINIVITIIHAKGLIIANMIFAISQMKILQYELTLVGQIEQETDEDVELRVKKCIM  
IHQEIARMMDLFSASKDIILMQYFITSSELALYLLQMMLADSAVFGRLLMNFIYLFVEVF  
LLFWCANNVLVESMAISDVIYNESNWITLSNGAKKDMLMMLSRAQVPMFAFKATFVGNIS  
LETFTKLLKLCYSVVAFLSNVRE

>CbowOR33

MIAGFTTFIQLQCDILCDGIINMGKDRENELRVEEFIEHHKLILRFASGKVFSEIYFLHFIS  
STSTLCMTLFLLLTLVDVNTSEFYLVVYQSSVFSLLLVPWFSSSEMQRKSENLPNAIYSSP

WIDASISLKKDIAYFICKTQEPIKFKALGVFLISVDTFMAVVRSSFSYAVLNNLNKGE

>CbowOR34

MTFFFKIKGLSPPKTTAVKIIYLSLALPHILMCTFVLILSEWMAFALSQQTFKERMFNMSVA  
TLDTILVFRITTVWAFNKAKLDEIRAIITRKSFNFRCFDLLKVGCEQVLTVGRTKEVEKERGL  
SCKEIKQLWQKAKFVTEKKCNEMDVFRKELMLNTRLLCCFIHLAITIISVLTYSFVNDF  
TNDTYEAYNPILNRTSLYRKFQYPLYLPFDTSFDGYYWLAYFYNCYAHLGNIITFLPIETTLT  
CSLIHLISQTAVLKEAFKYVDENNFQYQSFGASIIKEIRIVKCINEIQEIYRAVELLENLCNV  
QLMVQYGFATFLCSICYVIPLVENTMEGICCLIFFAASLGQIFTFSYCCHTLALELQAIGVS  
VYNLDWTNYPKSKLRTLNLISILRTQKPANLTAGKIIVIDLLFFIQVVQKSYSFYTLITKTN

>CbowOR35

MSHNEIVCMTTSIKILRTYGVFSPQSRELHPGMVFIYRFLVLAVVTSLTLVGSTLHLIKTIQN  
NEYNYTEM DLVYIVSFVTAYALIGSFVMKV KASGEMFVFLSNFEEFGKPINFDKNNKLFN  
RYSKYHYVYLESILILFSSNIFKSKTCRLENELYNLKEVCGLFTYTWMPFNIDYTPVREIY  
LTIQLLGNHHIYMLAGLVAWQVFETIQHIIIRIRHVKHLFVEALQEGDVKVRKFKFNFAVRY  
HNAVLSAFFSLEDKLNAAFVIFMVTHMVLTA AVIGTGIYCLFRRRSLSSFLVCMGFWFWGLF  
MDCFSGQRLQDESLELAVALYDSPWYEMDKFIKDIMFVLSRCQIPMKLRAYAFGVIDRA  
MFLAVMKGTYSYITLLRSQ

>CbowOR36

MYFFYVSFLYGTGVIFVCEFMIFNETIGKISKFVSHIGMLFTHVVGILKMSILIFGRYRILKI  
MNVLQNEKYHYAPLEDSQPGLLVVKEKFVSSGISILVFVLYTFVGVSAHISSLITINEEIKGD  
SFEGTNKTCHDYMPYFFYIPFPTETKGGQCGIAFAFMDVGLGIFAWVIACHDGVFVGLLNCL  
KTQLLIVCNIFTTIRARSLKAVNLPKNYKILHDEYNPALEKELYRQLSHCTEHLKLLLVVRD  
DLEIMFTFVTLSQLASLLIFASCLYVASTVPMTSPEFFAQMEYFLCVLVQLSLICWFGNEIT  
RASELIRLSLYESDWLSCSRRFKSSMILTMIRMQRPVYLSIGKFSPLTLATLVAVCRGGSFSYF  
ALFKSVQ

>CbowOR37

MYFNITIQKVLPILYIIGADPREGFTKSQFFLYFYNIFSAIGMVYLLVLKFANAENKVTVKDIT  
DAVICLFLFCHGMVKSTTMFVKKNSVQTLA QMEKHFVPMNNYKYSYIHNGILNICKTIR  
NTTNFIWFMHFCNAMGFLVGPLITKDPVLPFECYRPEWMGYTLLLFEDVTSIITILCPVL  
AMDVFFVTIIKLTQIQWKMLNSEIQSMFDLSPSGKISREDEENIMVMKIKKCVVHHNFFLN  
YQQLLNDTFSIPLFFFLIVIVLCMCVEMYVISTVSDWESLRTAIVYTATGCLEFMLCYCYPC  
QDLSDEADNISYSIYFSNWYRNPEYFRDTQLIMQKGQKLVAIRPGGFMMIMDLKTGLSVGIF  
PSP

>CbowOR38

MFAGCIFTCTFWAICPFTEDVASLPIAAWIPFKTDSSPSFELAFAYEIIATVIGGITDLNADCF  
MAGFIMVVCAQMILNDSLLNLRHFAVEELNAETGGNDDDDGIAEELQKIMNRKLVCEV  
HHRYILEFAEEANSLFTTSILGQFAVSVIICTTLFEMTLVPFASIKFISLILYQYCMLEIFIV  
CYFGNEVILESSKLTKEYAYHSDWRDCSQEFKRNLFFMTRSQRALKLYAGGFITLSLDTY  
VKILKSSWSYFVVLIVNKDSG

>CbowOR40

MYEKEFRNVFWLLNFVGMHPLKKYVTPFIVFNAILTFYITVLILKLLWDKELVAVESLCVF  
SQIWLKIFVLTTKRKRKIKQVIDDTQQFWENDPENSENKQLLKNLAKLERIFLTYISCSTCMF  
LFKPLLVKGTSIYKYKIPQIPFYVSYPIEFYVTVTALAI AVNLFISIVIVIGAGQFSNLNA  
KMKQLDLSIAEDCQDGLRTCTLEMNKNIEYHDFLIKIVSHLDEIFSMFLVVLGTIITSLLC

MNMYVLSQPTTTAVDMIRCGTMVCAFTSEFLFLYGVPAQRLMDEAEVANSAFYHCQWY  
LPNIIPLRKSLSFMIHRSQKSVCLSAMGFIDINRQTIVAMIKTAYSFFTFLQTIETTGGAK

>DponOr10

MTIIRSADNEQFIKLAQVALISTGVWIMPITENRSVAFAFKIYSLFMKGSCVMYFSLFAETI  
RLIIFKYDMDVILASVGVLFNAAKIMLKVFIYLYKHILEHFEDVIEKERALWNSDNEELKA  
LYRTKVRHCNVFVITVFTSSLMAVTALQLSGAFTAFELAEYSKANNITIEPHVVMYQSLFPFS  
KLDNLYWWLASQALWWWVGLTYNTMTHAVFAILLIYAATQLEILQIRLRNCIEPEFSETPS  
QMLIKEKVLLLRKLTQDHKYVIDYVKHFNECTKYAILLEFLLTSLDTASVSVNIIKMKGAE  
LSWLLSFLVLLVMQISLIAWTCNEIQVQSMIAIADAIFASRWYCLLDKEAIAVVFHMIVRAQ  
KPLMTIGPFGPMTTASALMVFKAAYSYSIMKE

>DponORco

MINKFKVVGVLVADLMPNIRLIQASGHFMFNYYADNSGSLHILRLGYCCMHLFFVLVQYGC  
IFGNLVKEKDNVSHLAANTITILFFTHCLSKFIYFAARSKLFYRTLGIWNQANSHPIFLESSN  
RYHALALKKMRSLLYIILFGTIFSASAWTAITFVGESVHFIDKDPDNDNETITEEIPRLLIKSW  
YFPDAMSGMTYYVALVFQIYYVFFSLFQANLLDNLFCSWLIFACEQLQHLKEIMKPLMEL  
SATLDTFVPKSADLFKSPGSATSQDHLIENDFNKNDDLKGVYNIRQELGNLNRSGALQT  
FGQGGGGVGPNGLTKKQELMVRSAIKYWVERHKHVRLVTAIGDAYGVALLLHMLTATV  
MLTLLAYEATKIDGLNTYAATTLGYLLYSLAQVFHFCIFGNRLIEESSVMEAAYSCHWYD  
GSEEAKTFVQIVCQCQKSLFISGAKFFTISLDLDFASVLGATVTYFMVLVQLK

>DponOr18

MKDRVKLMHSFKFIMILAGLWRLKLTDNRFYQWLYLLYSMVLQALFTLLTFGSIRNISEAI  
SNRDYTGVIDNIWLSLLTMVILFKMIMFQRKRFLDLILQSIDEESKIYTEETTCIQEIFEHNY  
KIVKHILLVCVVCSSSFGSVCVCNTITYFYQRHINQTEMKPMMAPIHQFPLNRHKYFMET  
YLLSIGTTFGGVIYYTTLTQVYFVVVTAFAVISQLKIIQRLARDFHLCSNGGDQEKEALTVFRK  
IYNKHLIYIDFVGNLVMKYLIFVECTVISIIASVLFQLIFVPTSLAASTLYIAVSCTVLSQIF  
VLSWISNEIEVESLSISDALFESRWYEQTQKVKKIIIIIMRSRKPLRIMIGPFYPLTIHTALNS  
LRAAYSIVTLIFAMSSSGQLQI

>DponOr22

MICSVAFGCFPWEFYFPDNKSRRAYEYGRIMFAYYIVFIFTIFVQLVVMLKRPDFDIDAV  
CANMCVTLINTVTLFRQLVFHFNPKFKKIIQKVIDMESQVYRKGDEKICSIYTKYVKGINK  
SLKLYFCFIGSLLVIFCVRPLLADPVEQVRGDEVKLVRLPQSSWFPIDTEEQYLYVYTWGC  
INCMISAFFVTCSDLIMFALLTQPMGHLNILHEILQNFDEHKRNFAALRNQIVNDDIAAYWTL  
VDVIKHHNEIITYVNEINDCMSFVMLCDFLQSSSLQVACILTQALENDIDVFLVLFMISFIGS  
MFLRLILYHYGNELLTTSQNIASAWQSNWYDQSPQVKIMMFTVIARAQKPLKFYLGQF  
GVMSLQAFISVLRASYSYMTLMYGLN

>DponOr2

MKFFKKTEENVFFGFNIMVLKACGLWPDLDYRYDKWRLMKDCLMISSLMPCAVPIMAD  
FIMQLYDGVNLTAAVENMIALNCIIGMIYVICFIANRRTHIKLMVNLYFNKYGNSRRTK  
EVDEKANLFSKIFMFYGILGNFVYMLMPQLSIDKCHNNRTAKMIDDGVPCGLVVRSVFPF  
KFDYKPVFEIIFVHQIYTCTMVSIVVLALTMLLCGFLMHIVNQLKNLREFIAKLRHCPQDK  
PGERLFFIIQYHIDVIEYSQNTAKAFSTMLLFYITLTSVLVSLVLCFEVIMVDAFEDSVRFALH  
LVGWLAILLSVCYNGQLMIDESVEVANDIYSLNWFNFPVGIQKKIQMIIMRSQKPLILDAA  
GMGLVSLPAFLKVLSSAYSFFTLLKLLK

>DponOr38

MKPSKTKKAQLISWTKVFMIGGGFWNQPLTNSYIGEKVYFCYSIFMKCGCFMWWWSMMV  
GELFRLVAYGYDVEIILAQFGLVNVASKIMFKLVVYIRENLLALFKDITEKDVEIWNLDNEE  
IHTVYWKNIKLIKSYVLALSVESTSLCLGMLDVSIGIHVILKTVEHNKAFNDTLEAHAMYQTI  
LPLNKLDNLP LLFTLQAYLAIIGFVYNCLTHLMFATLLVYAATQIQILQIRSKNFIGADQLSG  
SDMRDKLLVLKEISQDHQYIIGFVENLNSRTRYIVLVEFILSSFDLASVSVNLITLDFSSSDIA  
GQLIFNLSFFVLLSIQISILGWSCNEIKCESEELANALYASNWYLLNPKGQKMMQIMMARA  
QKPLIMTIGPFGAMTTNSVLAILKGAYSYSVIMRK

>DponOr35

MKNDFFGFCIPLAKYIYILPDISTQDRTKPLLHKICAVIIVLALFCYFSEVVKLYQIVTGEY  
FVYDELIRNYTVSYFHFTSLIKAINIKGAISARAFKTIIGFEDNIYNGEDEDIRKVKASVTPI  
QVRKYYMAGMVMVICYACAPAFRDPIEQRENETIRIRQLPVSAWSPVEEYFWLDFVW  
KSLVGAYLAYFFVTTDLILYSFIAFGACQVRILQHYIHNFNRYCEEIMHTEGVPKNESARLL  
QKQLIAMHQDVISYVNMINGSIKQLMMLEFIPGSVQLAGMLYQLMTNLNAIQCIFLGQFIS  
CLIRIFIYTN SANDLSQLSQQLAADWFEIDWIELPKDIKMNLNICILRCQKNLCITVGD LN  
AIDMTTFLTILKGSYSFLTLLTTI

>DponOr20

MLYPVRKGLPFYHNLLVLKLAGYYPKSSNYNKKLFFYCLVCWMSLWTGTLWNLIILLYLS  
IQNKSSHGITEAMGYLIGNSSLALICLHFALKHQDWSHLM DALIDFQKYGKPPKFNTVQT  
NASKVGITFFKVLFCAAVMYCVLQVLEEECEKLTFGKTS CGMMLPTWFPASHAESKLA  
KRLLLIYQLLACWAIAPFTVIVSLVLQANEFIAYRIDHLKSLLRKVGSNENPDLQLHQFLAY  
VQYHHHIIRLCRKLNYVAKYTTGHVALTFVTVVACFGHHSIQEKSLQSLTYQATYVISMCI  
LCYAGQNMQDQMRSIGDALYSSTWYNCSLKVQKMIPLVLLRTQQPIGLDAVPLGVFN YM  
LMVMVLKTTY SYMSFLSRTI

>DponOr25

MAIYPKCR LIQISMISSLLGTFFPWQFLFQDNKTFKNMYAMYSKMLMGHFTLFLFTAQLQL  
WILITDEELMRNAIFANLSVTFIYNITLAKQLIIMLNSNFRATIKQIETENCKSPIEDDEV TN  
EIEFKMVQRSDKIVKCYGFLLVLTILFFVKPFLMPTIVSIGNTTKVIRDLPISSWLPFDEQE  
HYSYAIWQVLNALQGSTYVASTDILMFNLIVFPAVQLRKLQHLLKNFAHYKEKVKTLYNI  
ADDEQAAKITLVYFISRHEI IQYVRRFNESMEIVMMFDFLQSSLHIASILPEVLMSEFSVM  
VVLMMVASFLVSMIFRLILY YHANNMILSAELSYSMYESNWFQTPKVQQMILIFMLRA  
QEPLTLRFGGFGVMSIESMIAILKATYSYVMLMI

>DponOr24

MSVLGETTQIKKKWRSSIAITEKVLVITEIWPND DTSLYRTMKVVFITIVCIVFNLTVIDELK  
MLAIRQDYKTL SMHLSTFGLYIGFSVKIILFQFTKHGPLKNMLDSMDSPIFHAYPPMQKH  
QDNCIRVSNLIGKFFVYLVGGTILFYLNKPFYSSYPLPITFSHPLTTTTFYLLLTLCVCSFY L  
IMIGICFDMVMGLANVATAQLDMLIEEITFTPTS IETLEKEEHRFIKRC AERHNAIISYVNS  
IEDVFTYIFLAQC VVSVTCICNGLFQLTHVAPVFSIHFYNCIFTFNVLF EIGICCWFATLMT  
NKGNDVADACYNYNWLHSSATR KLLLIMLCRSQKPLFITVGKIIQLSIGSFSLV LKTAYS Y  
YALMQHLYDKTSQ

>DponOr16

MDFIQLFAPFKLILNISGFWPQKNPKPIVEVRKVFTLLVNLFFCLSLSIQCLFLRSQIEEFLDV  
LTVITPPVAYL FFKQIVFFGHSGAFLTLMDFLKDDDLVS IPLQLRQKISDSLQVAKIIGVGYQA  
CCTMTILFIVIWPMFTEHQLPVQFTLFDLGD FYAFMYLLQIFALANAAANSSSLDLIALTLM

CIVKGQICVLNDKIRSLGEINASKGHGAQRVKYVSGCVLHHTKIIELVALIENVYSQIVLIEY  
LTSMVVICNIGFQLVIVELASFAFLMLTFLVTMLCQLGMYCWFGNEIMLHSAAIRDACYE  
SDWIHSCPQVRKMLLMIMERSKRPLYLTAGKFSILSLSNFTSVIHSAYSFALMQRMYGKS  
TTF

>DponOr30FIX

MFIRNQRAVFARTCKLAGLYPVQLLPEDENLRKLYTIYYQALIMLYFICLISFCTELFHLLR  
AEKATVDDILKSISMTTLFAMTALRQWVIRSSPDVQKILRKAGNVEQRVYEENDPEVVNIF  
ERAGHVALLYYYIYAVGTVFLCLGCILEPLYDNQKVFSGNATAFSRKLPLPLWFPYDIQAH  
YWETFCVTILLICLLVVFQVAVDVLFYFIRSPVIQLEILHHFFKRFNDYTGRISVEPGNVAS  
NVMRKCIDMHRKVIKFDIFNENFSNIIVLDFVQSSFRLASISAAIIMIESFTVTSFVFTLIF  
LWITLVREYYIYHAGNEIIFLSSGLVHSVYETDWYIENRQFKYMKMFMVRAGKPLDIKIG  
RFGSLGFPALLSILQASYSYVTLVRGIQKS

>DponOr45

MAKTLSEFIQLSKFYLLLSGLWPFKISDNFLVDKIYRIYTLCQICYLVCVIFGLLVNLVILIIRF  
DQPQRIIGDINLFIIVFECCLKVVIFQIGKVPFMLNQITQFEDSMEASGDAEVKDYAKDAI  
YCRINVIQSIATIIACASFAQDSVVTFTSDDMSVFKDNPFMHDLWYFPNREDYIYLVICIA  
FICDMQGLVCNAACQTTLLCLMIYARTRKILQIRLRKFDKIAVEEYEGDVVRVAVKDLIAE  
HQYLINFKVSLNDRTQHVLLEFMLNSLCLASGTSQFIIDTTSGLWATVFLNLYVIVQIFIL  
SWHANEISVEGLAVSDAIAASQWQKQSKQKKEVQKLLIIMMMRAQKPIGLTAGPFFRMTNSTA  
VQTMKVAYSASYASIMTQNMPE

>DponOr7FIX

MANLKQALQIYDICSFLEGEHIRLGIGGFYPRRIKRTFIVNLVTVFAYIITIAQMAVVINFLS  
ITDIVTITEVLLFSMTQVGFVNKLVNFHRNSRKVATLDELISQEIFTRVTVAEEMDIMKTSFQR  
CQKVLNIFLLSCFGVTLLYGVPVAVNGIMTGTKMYPFPGKFPNPDDYFVLIYGGEVATVA  
VSAWNGAMDCFLTHTVIATTLFRILRKKIKDLHYNTNEGERPLENRIKHCVRYYNEIIK  
YVSAIENIFAYGILVQFMCSAIVICTLGFQLLVVASESGQSGLLVVYLFMMMFLVLYCWYG  
HMLMEESNRITEACYAINWHEMKIGQKMLITIMERAKKPIALKALGIFRLNLSTLMTILR  
SSYSYFAVLQQIYRNDKIMALVTN

>DponOr19

MYPIRKDLPFYASLRMLESIGFYSENTNGFKRSIVRTLIFCILCWSIILLSAVLLIYENLNDK  
NYASVFFNIAVAVASTSTYCCTLLFVKYQEKWSDILTALVNYEKFGKPRRYNQLKERGDRV  
AMACWGGILTGVFLYMLFAILHENDCELEKTGGGVCGLIPTWLPAPYDNSLLARRLVLLY  
DIPNAAVSSFVLVTHLNIQVNEFNARIDHLSLLFNDIEFCKDPQAQLNKMKHCIEYHQDI  
IRVSLQFKNLSKRTMGHMTLTFTIVTASMGQQLLQTSKNFYQENAFFFEIYVINMFIMCYC  
GQRLEYKMKTVGDFLYSTHWYNLNPQLQSLIPLVILNSQKTIRMDAVPIGYLNYELFVTLL  
KTTFSYFSVLTQLT

>DponOr48

MMTLHVRYPLNRNKYFFETYILSLSSTLTGAIYCTISQVYFIVLTAFAVISQLKVIKRLARDFH  
LSTESNFNEEEALTAIRNIYNKHLYVIRFVHEVNLDIKYLILADCMVNSIIAFLIVQVLFVTT  
SLSSLMFYVAVSCTVLSQIFIISWFANEIEVMSTSISDALFESHWEQTEKVKRVISIIMMRS  
RKPLRIMIGPFYPLTIQTALNSLRAAYSVTLIFAISTRNTMHV

>DponOr43

KFFLKLSGLWPFKISDNVLDKIYRFYTLQICYLVCVILGLSINLVILIIRFDEPQRIIRDINL  
FIIAFEICLKVVIFQFRNVPHMLYQITGYEDTIEGSSDAEVKAYYAKDAIYCRRINVFQFIATF

LACASFAQDSVVIFLTSDDMSVFKETPFMHDLWYPFNRADYIYLVICIAFICDTQGLICNTA  
SQTLLCVMYARTRKILQIRLRKFDKIAVEEYEGDVVRVAVKDIAEHQYLINFVKSLNDR  
TQHVLLEFMLNSLCLASGTSQFIIDTTSWGLATVFLNLYVIVQIFILSWHANEISVEGLAV  
SDAIAASQWQKQSKEVQKLLIIMMRAQKPIGLTAGPFFRMTNSTAVQTMKVAYSASYASIM  
TQNMPE

>DponOr40

MYSKQESLLGMLKPMMMFTGTWRLDGMNSTVRWFYWLYSLIFHGFGVLFIIISVVAKFVE  
FVKSGADSEDISSQVFLLSGTCIFSKFLIYQICNVSDILKAILQEEKIWLKSKDSEISAYQA  
DIKHVRKWNWGILLSTMFTGVALMSAGVASLIQADISSINSEGNEKEEWSMIPMWLPYNE  
REHRSTVVVLKCIFTFIYVCMFIVSGMTFVALMIYSLGLLKMEQVKIGKCNWTSYNMADL  
SVDMKTLLINRRVFRFIKHLDRSIRYVVLVDVLLNSISIAALATNITNVQRGDFVCTGFL  
LMQVTQVFVLGWFANDIIMLSRTRADVLYNLNWYYLDLKNRKLFGMMLMQCQQLSVISI  
GPFGPMTIGSVISVIKAAYSYMMMLMQSYK

>DponOr6

MIKQPPYEVYATDFFSVNRWILKCAGLWPPSTPNRVVRRLYQLYTIGVFLFVNLWFTGTEF  
VSLFYTYKSQYELIKNVNFFLTHFMGAVKVLWYFYGHLLRDIMNALESPQLHYEGYADF  
SPHRISHLHRAIGRRYSLLFLCLAHATLISSYIPPLIAVAEYLNQPQGLQKLP SRLPYFCWM  
PFSYDTPGKYLLAVAYQAGPMFSYAYSVVGMDALFMNILNCIAENMVLIQGAFKTVRERS  
TLHYCVGALAPPCDAIREHPLVLRQMDLETKKIHLQITLRACKHLEGIYHIITLSQVTATL  
FILCTSLYLISTASPFKQFFAELVYMMAMLFELFLYCWFGNEVTLKYEQLPMHIWESQWL  
ATDDCFKKQMIFTMLRTNRPVYFTAGKLARLTLPTFMSILKTSYSIFALIKNFSK

>DponOr33FIX

MKNDFFGFCIPLARFIYIMPDKTPQNVYGWRNKLWAVFMYGLAVFCHLTEIILKFQIVTAK  
YFLLGEFIRNFVITSLHFTSLGKAMFIGGKTGKKA FEKILDFEKHVYKNLGDDIRLIYKNK  
VTSIQKVKKYYLIGIILVVIFYVAAPIFREPIHIQDGNQ TIRFRQVPLSSWSPFEQYYWLTFIW  
TGLTGIYLSIFFVTTDLICYSYVQMINEGMKNLMVLDLFLPGSVQLAGMIYQMMTNLSVIQ  
CILLGQFICSLIARVFIYSNSANNLSQLSKQLAVDWFEIDWTELPKDV TNLNFCIMRSQKN  
LQITVGDLSVITMESFLTILKGTYSYLMLLMTI

>DponOr39

MSDSKSKKVFAVMRIILMCAGFWNQSISKNRLINKIFHGYSVFKLSCLVFWLLILAETSRL  
IICQYEITITIASVAILLTDTKIVVKIVIFLKHNILDIVADV ENKDEIRTEHYKEIKMLYDRKA  
NFLKFAISVLGGSTTGAVFLLQGGGALVLRDRKHNLKFN DTVETHGMYQTIFPLHRNNH  
IYWL FATEVFWSYLGITANIVTQLICVILLHAASRLEV LQVRFKHLIMPDFQIKASDEDMK  
AKVTELKSIIRKYQLTIRFINEFNQSTKYITMIEFCLSTFDMASCCASLTKMKGYESVWLLF  
FMMVLLTQLYLIGWTANEIRVQSEAIATALYESNWYELNKEGRQLILISMIRAQRPLNINIG  
PMGPMTTRSILT VLKGAYSINIMR

>DponOr3

MMENKSYRIMQLHTNLLKCLFLWPVDTFSPGLNSLLMYGSFCISMCCGIPIISAAGYQFYV  
GIEDVNILLEALIGVYDIIGNTVTYVCFLRKQRQIQEIIDDIKDFFQYCGYETVRKIDSEIMC  
HTKYFLFYVTVSVILNLAWPMLSVNNCLKSRRSDFYIKHDPCGMPTQNLYPFEASEGIVF  
WVLYIIIEAIFCYHTCCFFSLATVIVIGFLKHITAQLKCCAYKFEHICDYMGSCKNDENVIIRE  
FVHLIKYHQRIIKYAEKVFGIFDVMIIYIGVTSFTLAIGYQIAIPKTNLED RIRYTMLLIGW  
VLLFYSICFYGQQVRDESMKVGEAIYKSEWYQHQTLLGMKTDIMFVMRRTQKPLDFKAT  
LLGEVSLIVFVAVMKRAYQLFTLLLTVTEDGP

>DponOr5

MDTLGPALTKVRLRLPSLDIPDSKGTDYPKNLYSAIDRISFLCGQAKLSKNRSWILRFAYSL  
YSYTLIIIAIMFIIEIITFRKSLTELTTLVSEIGMMFTHLVGMVKFWILHKRDEIEQVKNKLR  
DVQFEYVGGIDDFQPGLKMRKEKLFIIISTFIFALYNFVGISAHISAASMMYKYTANGNFLG  
NTTCETFPVYYFYYPFDVSSPSSCHYLLFYMDLSLDIYASYIATFDSVVFILLNLLATQLNIL  
GDALRTIRKRCVKRLQMKVDSSSLYDADNPLENEMYNELTHCTKHLYLLELVGNDIESIF  
TFLTLLQTIASLLIFASCLFVAARVKPTTPIFYSQLYFSAVLSQLTVYCWFGNEITLASSAIP  
YSIYSSDWFSSSERFKKSMMLTMARLQRPLYVSIGKFTPLALTLLSVIKGSFSYFTLFQSAG  
TD

>DponOr36

MKPIEDQSLFRACKILVLCGGMWRGNIPNWPIAHQKLYKVFLRGAQFAYFFCLPSLVLSLW  
VNVDQDNEKAISVLKNITFVVVIFCKMIIIQSRPVTMLIEAASEKEQQAILSEDPQISEIHRR  
HVVYTEFVVKSIMLCTFLAGLAYVVGDLYLANEFYKLPNAAPTDPKPHSIYFWFPFNP  
EYYKIALTYEFVHVIVQTVIYNGASHAVVNSAIFVKVELKILEYAIRHMMSKPNLSNLTPAQ  
LMKIHIRKHQELIKWVCKFNDSFKYIILLEYSVVSLTLASTLTEILQGIKMFVNGIFFLLSTLS  
LFILSWNANEIIVTSVFDLSDALYHFPWYELDKEAQELVLFMMLRCKRSLNISNGPFGFLT  
RGAVSRLKLAYSVVSVLSR

>DponOr37

MFSASKWVIMSSGSWGLEVDSKYRILYKIYVLYIRFIYITSTVAVFAMFLVNLGSNNDKAIE  
ALSILTCSVSCIIRLAVCLKQKVVNLLKIVMEDQFNAYVNDPKIKVMLQEYKSYVTFLCVF  
VVCYTYSLVILFNIFNGIIEFQSFRKLHPNATEYPQYLVSIVLWPFNVQTHFTLALICQTVLFL  
QSCVLNYSSTVLFNTLMIYVVIKILQHLFQNFNTYYPKNLENFHMELRDVLAINLKHLLI  
RQHQDIISFVKELDKNIKIGVLIETITSLMLATISIQVLTGNKVASFSFYGLILYQLFLLSW  
NAAEIKTQSEKIAGAIYATDWYVYGPVVKQIIHFIIMRCSKGLSLDIGPFGPNDLGAASARL  
KLAYSIVSVMGNNK

>DponOr27

LLLCVIQPNCLKMAIRTSLFQFAKYFMTFCGLWKVPFSPKVQRFYVVFVSNVSHFVYCSF  
VLSLFFVKALLIVVGFESSDNVFNVAISVAVIMFDINFKAMIYVKFGLPRLFHQLMKEEQSIEE  
NSHQEISEYYLRQCELYVNICTLQLVTTIFPTYFYILVNILQFPLDAENFMYEMWIPFPVQW  
KVLAIKIVICQYGIFMNTAVRSALQSLMMFITSQLWILQVNIRNVFSEFSEEAAAREELGKLI  
RKHQFLIGFVEKVNDVVKYILLLEYLLDSINMAAAMLQIATASSVTEMTFTLVYFILLTQL  
VILAWSANEINTQSVEVSNAIYQSNWMDQ

>DponOr12

MEKDKFKILSLHINVLIFLQFWPNPLFNNVNNHIMSIVCFITVTSCIPCIWTIYKVFEGMY  
DIGILFESFICFVNIMAYLTAYWTIFRNKAVIENLINDICIFLPCPTNLIRDTDASSIRYTKYLI  
VYVTLGVFVNLAWPAISPEGCMRQRQSEYLLKHDPCGMPHNYYPFDASKPIPFWIAFAC  
EALLTCNICILFSMVTAILGLLMQITEQIKHCCDKFEHINFKGDVETARKEFLECVRVYHRAI  
LEYAERVFTVFAPVMSAYLVVTSFATALIGYQIVETDNTQDRFRYAMLLLAWGCLFFMICL  
YAQILQDES VLIADALYNSDWTCNSIYFRHYIIRVIARAHKPLYFNISFLGKISLTRFVSVMK  
TAYTVFTVLVTVVDRK

>DponOr32

MNSKVNQAEKLDPVDKRSKVFPSDFLRLYAIFTGQMGIFFWQLMFERNKTYQNLNLYS  
KLILSYMYVTVSMWLALVFLCLEDTLRIPEITKNITVSVICTVTIIRLFVMMKLHPAFLRNIT  
FIIDAEQYILSSNDAEVHRIYKNCKIISNRHTIFFIVLSYLMALFISLRPFFTDAYEINYKNESL

QITSLPLSIWVPLNEQEHLVSVYFVWVNLNNLVMTSIVLSIDIITFLLLIYPVGQLQILHHILSK  
FENYKNRMKLNYPGLDDDTIGAITLKACIDLHRNIIAYVDDLNACMNIFMVVDFAQSSLL  
LTSVFAQLLWVEPSITFYGFVFMVYTYLNQRLFMNYYSNEVWLLSENLNSVWKSNNWY  
EQSHYVKFMIYFFIMRTRKSLKFKIGPFGFMNLSTYIAILKASYSYIALHSTQK

>DponOr42

MAFYGFLFNCAQTPLQTLMVFSAAQLEILQLKLSRSFEETVSSEEAKLEHVKKLIREHQF  
LIQFVTNLNEAIKYTILLEFAVESVHGAGALLQLISTKKAIEIPYALMYLSLLVINMSALAWS  
ANEVTTQSENVTVGVYGSNWTQAQSAPLKKLLLMVLMRAQKPLSIDVGPFRPMNNEAAL  
MTAKGSYTYAQFMIHSRSISK

>DponOr23Fix

MAIYPKCRLIQISMISSSLVGTFPWQFMFQDNKILKNMYAMYSKMLMGYFTLFFVFSQQLEL  
LILITDEEVMRNAIFANISVTPIYTITLAKQLIMMLNSSFRAITKQIIDTEKCKSPIEDDEVFEI  
ELRIVQRSNKLVKYYGLMMFVLGTLFCVKPILMTPNIVSSGNTTKAIGFFPLSSWFPFDEQ  
KHYPYAYMWQTLSSLQGTMYVTTTDILMFNLIVFTAVQLRKLKHLKLNKFNHYKERFMTL  
YNIVDDEQAAKITLIYFIRRHKEIIEYVRLFNESMEIVMVFDLQSSLHIASVLPEVLMSEIS  
LMVVLTVASFLGSMLFRLSLYYYHANNVILSAELSYSIYESNWFQTPKVKQMILIFMLR  
TQEPLTLRIGGFVMSIESLIAILKATYSYVMLMI

>ItypOr14Fix

MEYSFHVHDFRSHMFLYVMLQGKIAVILIDYVCSINHMKNCSSETTMKHLKIIKKHLEII  
RYNQFVLKSNQYFYLLYLFNEVFFGLLPMFEYFSPNRSIIAVSSATVYFFCLVYAVNDAEE  
YITLVEYFRTEIFNLKWEVDVSCRKVYSILITYLNEPMKVDFVNVNINRALFCQILKLCIQ  
YLISFIQPTLVDSFCSALYVLSLIISHYW

>ItypOr28

MGLYPASRYFKNPIMWSSILGAFPWQMIFQENAKLQQVYRWYSNFMLTWYFGMVTTEYI  
QLYHILNANVIQMDEVCEVCMVSLVFTCTGLRVVVMRRTNGLSEIIQTVVDAEREADGL  
DDEKTRQYEDIHVKHMEKVSFIYAAFVFMVSVTNGCLATLYADTKSVIIGNSTIVEKPLIIST  
WFPFDKNEHYWVAYGLQVFDGYMAALTVACTDILMFNMISYPIGQLTKLQHLVRNMAVY  
KTHFEAFPTFTKIVQRHKHIIKYVELFNQSMGTFAIFEFVQSSVQIASVLVQTSRDDTLMSF  
CFIVLFFTSMLTRLFMYYYYSANEVIIQSINLGDSVWESSWYHQPHQLKQAMLMLVRAQK  
PVSYKIGGFGIMSMQSIVAILKATYTYISVILRN

>ItypOr32

RVKQLRLVSILCGLIGILPYKFISPDKKLYQDIYRAWSILSNLIFVLGMFLAYMKLYTLFNEE  
KIRFVELSRNLAVTMLCTMTMARQIIRVKPEVSNMLSQILETEEAILKNDKTVAEIYTKN  
ANNLYRKS VYFWFIMFNVVVSHIARPFYIFEEIQGNVTVIHKTLTSLWFPVDDQEYFWE  
CYTISSLYAVCFASFQSYTDIFMYAMITYPVGQLQILFHTIKHFQTYKMELQRLLDSMNSI  
AAKLMMKNCVEMHRLIHKYIEDYNSCMSILTVDFDFQTSIQITSILSQIVMIEITVFLAVFIMI  
FLTMVFYRLLMLYYYANEIITSIDLCAVWQSEWYNEPPHCKFMMQIMMRSKTPMLML  
KIGPFGSMLRAFLSILQASYSYFMLVYSQKDN

>ItypOr31

MHIFPKSDHLDFSFALCSMLGILPWKLVFQDNSFLQTLYYLYSKTLLIITVIFITTEWMEVCR  
ILNXDPVNLTDLNNAIAPVLLFTVTAIRMIIIFNRNPDFMKLLNYIINRQEFMAQRDDEIRKP  
SQKFIKINKWTGVGYLIMYLAVIYQLLALPLVLGPIEQQTANQTTTIRILPLLSWIPFDTQQH  
YWGCYLWQALNLQLASCNICHIDVLMFALILYPIEELGYIKHVLRNFDSFKSRTGIENSFA



SITVFKDVIKIHNNVINYVGTVNDTSLFVMLLDFLQSSLHIAVILGAVVGGPTDLASLSFV  
GTHFFSMVLRPFLY YYYANQVMVLGGDLTKEVWNVDFEDES KDVKYMVRFFNMRAQK  
PLQYFVGSFEVMNLQSFISILRVAYS YVMLLHTLQ

>ItypOr23

MAVYPKSEYLKVP AIYCSTIGIFPWKFMFQDNKNLQTIYRCYSIVMLAWCIGFVVTDYIQL  
VILLTSKTLDMQEISFNTCITLLFTCIGLRVIVYFSPNSANLIQSIIDSEKVTYLDDAECMKL  
EKKHLRSVRLISHCYFIFIIFSTTSRCVYSFPKEPDIIQNGNETEIVKEHMLSIWFPPNQEKEYY  
LTVYNIELLSFLGTFFVAYVDIYTFNMISYPKGQLKKLQHIMKHFHNYKAKYSSETNEEN  
DFIVFKDLVQRHKQIIQHINAFNELMEFVAIFEFVQSSAQIACGLTQSSLENLTIGSFLFVMSF  
LISMLVRLFLY YYAANDVTVESTKLAQCIWESNWYEESQKIKLSMLMVIIRAQKPLIFKIG  
GFGAMSVQSIVTILKATYSYITLAYKRT

>ItypOr16

MYNIPENERKNYFLKFSRVTMLMLGIWPVRRGGDLLEKLYESYFLTTFLY YIAFNLSGLAL  
AIRTWSNNYLTTASSMGIVIEYMSNAYKVWLFKTSVFKSLIKEIQDREREIFEGPDEAFKEI  
YIRNAESNKKVVLFYTIMGTSGISLYFITPLVSNVLMPLGYNNVTGVYEHYFIVFNWFPFD  
PNRY YWAAYLIQFTGCLIGYSYIVHCGAFYISILNFIRTQLKILRHVIVNMSEYSLLYKNTYK  
LTEEQSQFVLLRAVVLEHQRIISFVTKTNHTIQLFTLINFVISSFQLALLVYQIFQVAILQQVT  
VLSYFITLSTQLFLTYAAHMILFESSNIASSIFEGNWDYPPQTLKLLQMICMRAQKPLAM  
TIGPMAAVKVTALFQIFKALYSYICLIKF

>ItypOr34

MKFRELIHNDFLGICIQLGYYFCIPEKAVTTDKIESRNYFFYT CIVRTLILYCHICQWVKMY  
QIITADIFIFDELVRNCAITSIHFQSFVKTSIFRQNYQLFENVIDFENVLYKNNDQKVLLIYRD  
TLQAIKNSRLVYVFGILIVIFYIAAPLFRGPYYVEMGNETVTIIQLPLSAWSPTNNYFSNFA  
VTGAMGAYLAMV FVQTDLLYCYFLYFSICQLNILEHYIVHFHHYSNELVNDHKCSHVMA  
LSLTQKIYIKYHQNIKNVKQLNDALKNSLLIDLVPSSIQFANQFYIATNLNIMQCV CIGFFT  
IMLSRVMAYCYLANQISVQSQKIGSAWFQMDWSDFPNEMKKMISFCIMRAQKPLVITLG  
NFGNITLMTFVGILQASYSYVMLFITL

>ItypOr2Fix

MKVLQRETEITFFKFNIWVLKTCLLWPEDLNYKYDKKRFIKDLTMVASLMPCFLPILADFL  
QQLYEEVPDLTEAVENMIALNCLIGMFYMVICFVRNRRMIIQLMIDIRTFNKYGNDSITQEV  
DNKANLFSKMFY GILGNFVYMAMPQIRVSKCHLNRTEDMIEKGVPCGLVRSYFPFKF  
DYSPVFEIVFVHQIYTCTMVSVVVLVLTMLFCGFLMHIVNQLKHLRVLIARLKNVPPEKFE  
RKLIFV VRYHVAIIQYSQNTAGAFSTMLLFYITLTSVLSVLCFEILMVDAFADSVRFTLHL  
LGWLIILLSICYNAQLVLDQSQEVANDVYSLDWVSILSVDVQKKSXVIMRSQKALVMEA  
GGMGVVSLSAFLKVLSSAYSFFTL LLLKFK

>ItypOr8

MSELFLHFPRILMVICGVWRLPYFKSKKVQTVYDIFSIFLQFTFSLMCLSMFFELVNLINT  
WNVLNLI EFSRVALSSYL CIKALVLRNSSIQRIMVYMIKEERNVLRSKHQPKALYMDTV  
KLINRVSFL LLLVLP TLLAFSADCLRKG IIFDDAVKYVYLPLIDQKKYKTVQLTVQTIFIN  
LIGFY YCMTQAFMVTAMKFAQGQLELLQLYFREFDYAARQSTTEIAYLKTLL EYHQKIIH  
FVETLNKEMRLVIII EFFFSAVNIACSLFTLLT MATNLIDILFSVNCLVFLLAQLAILS YLGNEI  
YQAGLN IASASYELKWYEKNREFQKNLLLVIKRSQKPLVLSVGPLGPLTNETFVSVLKASY  
SYFNL MTRYN

>ItypOr17

MGLMTTPRFFLQLWGIWPVNTLLPPKJYVMYRFCIIGWYSFFNIFQFIASIRLILNNESEFERI  
SRCISVMVTLVLMVNSLIYQKNCIPQLCSTVMEIEQXLARSNDAKITQTYHTTVAKNKYL  
NLYIVGSSLFTLVAFIGLSLLDVIKAGPAFWDFDNVTFMHELYVPFNRGNHQALIITNIFTA  
CESVVVNGVIQTTFYALV MYGALRFKILQLNLKKIEQTEGDRKWRMRELIQDHQYCIRFV  
GELNQATKNVLLMSFVLNSLKVASVLFPLMAIREFTDLAFLIYSSMLVSEVVFQGWMCN  
EITEQSLQVAQTIYDTFWYKESKQYNVLLQLMLMRAQRPVTMRIGPFGAMTTSTILTMR  
AAYSATLMMNSS

>ItypOr18

MYTLSKNKPFYYALVLLRAFFWYPSSPKCSVTFILCSLVLRLSSTLAALGTLAHLVLNLTG  
ETKAEISEDIGDLTGFVGCMSACLNFLWHRSRWSSFINRLTFTKQFGTPPGYVKVVRGNL  
ITLACILY TIPGMLWYSHLTHLDIPRCEALNREFGMKEACGMVNPTWIPPGYDRRNGWRF  
WVLYVLQCTGIFVYLPSTFVISNIPLEAVGVIVTRIBHLKYHLKRCGSDLGRLYHCVKYHQ  
DIEVSKELSDLVQATLGTLLTGAVVIGSLGSQVIKASTPKAVTFILGYVTTIFMVCHAGQK  
LINQSLTLADQVYWMWEYEQPKIRKDLRFVLARCQKPLGLVGPSPMGXAGYSLFLIML  
KTSYSYLTLLNEVIS

>ItypOr4Fix

MDKQSQILKFHVKVLKFLMIWPF DGLDPNQNYL MRGCFAYACFCSIPVFSGA AFQFCVG  
IDNVKVLLEVLVGVGNITGYNIAYVCFLKNQEKIQLIRDFQEFVQFSGPEI IQNTEEKTRY  
TKYLLGYASIGLVITFSWQMLSTESCVAQRGGDYVVRHDPCWLPVRNWYPFDASQP KLF  
WIVFPIEAIYSIHICLFFSLATSTIIGFLMQITSQLQYCSNRFEHVFDEVDLKPQQIKP DFLFL  
IKYHKKILDYSK KLFNVFDALIVVYISLTSFIMAIICYQIVDPKISAQDRIKYAILLI AWCLLV  
YLICYYGQKVQDEALKIGQSIFKSHWYGGTTAVELKPYILFTLARTQIPLEFKAQLFGTISL  
LQFMKVMKWSYSGLTLLLA VTDED

>ItypOr13

MSNYQRYNIQTFLKEERLFLGITGFVSGNLKLHLPTGVTYVLTMMQVLASIYYGLSTTDLA  
EITAAFMITLSHINTLNKLFGLHLKSLTQLDRILVKQIFALADDRELTILKRTL TACHNMLTM  
YLVTVLGSILLYGATPLVANYTTMERNYPTLAKFPFNPDDYYWAVFAGEFFIVAL SALSNG  
CMDRLF A KHVAIATGLLKILRHKIKQIMD VDDQKVIEAKMKHCVLYYNEVMGYANQIEN  
QFSFGIFIQLCSCIVICLIEFQVLLATSSETIGLLTYLTCMITQVTIYC WYGHQLMEESNSIS  
MEFYDLNWIEMS VKNRKTMLTSKERAKYPIVLKASGVFPLNLATLMKILRTSYSYFAVLH  
QVYTK

>ItypOr9

MFSSKNLYKYYSHFASTSIIMYTIMLTIRLVQLVIEGQTPSAKLYRCFTINIVIYMMTANLIIF  
RRYGLPDLISQVMKDEEAALNSLDDKDIRKTYLAQTKIYEFTSVAQVVSTFASGLMFIALNV  
YMKVKGLLKHEAFMYELWFPFNRENHDGFVIFFNLYIVVLIMFCNVASRIIPQTMIIYANA  
QLRVLQILLEKAFDAPCSDPLVKIQELVKKHQDLINFITFLNSALRN VIFMEYIINAINVAAG  
LLQFITVRAAMD LVYAFVHFSLLVIQIFVLALNANNVSTQSEAIANAAYNSQWMDQSNNI  
KKIYIMIMRAQKPLVLNIGAFGVMNAESALTTMKAAYTYV SIGLQR

>ItypOr19

MLIFGNIISANVIVLFGSSLINGDYFLVTSSFPFALAIIVVNGSTLSFAVNHKQWSNLFKSLTD  
CQKFGKPPNYDLLKKNDRKGMICMTCYISTCTLF AIIIEAVEEQRCLKNVSKHEICGFIIPV  
WWPTNYHPSTFLKTMVQVYEVGTIIILSNFTIATLQYQVCEYIAAKAAHLGLNFNAIDPN  
SDAKTQFEQFKLFVDYHQHIISLCAEFDSSCKRTVGHVTFTTAAISALFSYHGMQGN YKLL  
AFLALYILNLGFMCHTGQNLEDAMLGISNSIYSSK WYELNIRVRQRIPFLARTQKRIGLDA

VPIGYLNYALFMTVLKTTCTYLNLLNHTI

>ItypOr27

MLNGDVLKMDAICSNICLTLAFTCSALRATVMRVGPNLLKIIQVMHAEKNPASIEDQTSF  
NLERKSIKTRKLSHLYAVAITMIASSKCALAPFEKGEIVHIGNTTIIDRPLIMSAWVPFNKN  
THYWAAYIIQIYFAALGAWHVAYVDMFMFNMLGYPIGQLKKLHYYIKNITTLTRNDDSLE  
EFKNVIRQHQQIISYVKFYNDSMGTFAIFEFLQSSVQIASIFIQTSPSDMNLGQFGFIGGFFIG  
MLFRLFLYYYTANEVMTSEKVGVS VWESDWYEQPTNLK MALLTVM MRGQRPLYKIG  
GFG LMSVQSIVAILKATYTYLTVVVRNN

>ItypOr43

MDAALALMKNITFVAVVVFKTVVVQSDAIVKLVKAASVEEEKIRNLTDQAIRKIYKSNVD  
YCNRVTKVIITYLYGSGTIYVLDGLYKSYTYENHPNVKPEDPKPHTVLFWFPFDHNRYY  
KIAIAYESFHIFQTLNYNGVAQSVVSSVMVFLKIELKVLQHHRAIQGGSRDYQKVLKCAI  
KHQQIIQWVNDNFNNFRFIIIFEYSMISLTLATILIDILQGTKICFNATFFALNFTQLFVLAWN  
ANQISDESSISISDALYACSWYEFDKTTQDFVLFMTLRCKKPLNISNGPFGYINMDAALS RV  
KLAYTVVSVLSTSTK

>ItypOr36

MKIPHMFEHAMKHERNIFKSRDLELIICYQEQQVYKYGRRVNLSQFLVTTLSTSTFAVTALLD  
VYWAADMSKYEKEPFMHDLWFPFRRETHMNWVIFNLFMIVQGTCFNTATQATLINLMI  
YSSSRLKLLGLKLRKFDAIASQNGRDILETVHDLIFEHQDLSFVESLNVRIKYVLLMEFIL  
NELGLASGIIQLIVIDTTSYMVSVVTIILQLFQIFVIAWTANEITIQQAKIADSVMASNWVE  
QPTNIKKLFLIMVMRAQRPLGLTAGPFFNMNANTAVSTVKAAYTYLTFMMNNYN

>ItypOr6

RYATDFFFQKPM DVKKGWFTEALKQKQGSKYSLMFLMLAHATLTSSYVFSTITTIQHMKG  
NSTVALPDRLPYYSWMPFSYDTGPKYLLAIGRIKQVPMFSYAYSIVGMDSLFMNIMNCIA  
ANVTIIQGAFTIRERALPGQPNNVPHEKADMDVLRVELRKIVNHLQTIFKACDKLENV  
HRMVTLCQVTATL FILCTCLYLVS IAPPLSKQFLVEFVYMLAMS FQLYLYCWFGNEVTIKF  
QELPRYIWASSWLATDTQFKKALLFTIMRTKRPVFLTAGKFSRLILPTFMSILKTSYSIFALIR  
NTSK

>ItypOr35

MDNQPKFLLFTKRLAFALGIFPSKLTQDNNWRNQC YTYTKFCLGLFNLYLLTSFVQLFV  
IMSSNPIDFTELSKNLIITPLFTVT VIRQICMSQPGFIKLIQHLSHEMYLDTXTDKYVAYIIQS  
SNIVFCSTFDTVGEILLTILVYPTVRLKILKHFENFQKYERNFTDPHSADRLMKVCLKIH  
TDIIRYVEQFNSVMGT CMFLDFIQSSVHMACVLAEILTGDVSLIELVSTSA YLVILNFRLFIL  
FTTTANEVIVLSQGIGVAILNTN WYKKNSSV

>ItypOr1

MWITMFCTKNRHVLISLVQGLSDFTGFPPNFDKFMQQLNFYSKIHLCYLTGGSLMYFVLF  
APLHKRNCDELKREKNLTETCSLLLPLNAPFVEYQSFGKFPTLQLLNIIIFLSLMYMYMCA  
GTIVWLNVELVEHIRIRIRHLKHMILRALKSNDKQFRREKFRKAVRYHEYICSMSR LADEF  
FGTELFLHVVL TGAILGISAYLIGDGSLETVMIFVGLNAINMG SVAGQRLINESLGISDIIYE  
VDWYNFETALKKDILFFLVYAARNLCLLGLGMW

>ItypOr11

MDVIKDILRNFKENSL LQAKFERHLKVAIKTKKRGDFLFLYGTFLGFGTQLFWSIYPFSQN  
KKLLPVNGWYPYNPMNSPSYELTSFFQIFASAFNISHTMNIDSFTINLMMQTMQCDLQL  
TLKNIMQFHTVDGILCQSLQQNTEPLEDILTPNLKTCIRHYIEIKRIARKLEDIYRTSM AVVF

LGGAFIFCAIFYQMLHSQRDPTEIFYLLFFLFSMLTEQFIFCWFGNEITFKSGQIHGALYTIP  
WVDCSVKFRKML

>ItypOr7

VFFDQLRVCYFNVWGGTLNGQRLQWKEKLSFSRKFPPNPDDYYVAIFLGEVIAVAVSAWN  
NGSMDCLFAKHAVIATTLCKILRKRISTMLQITEDDRTIEDKLKHCVIYYDEIISYVTKIQRI  
YSYGVLIQFLCSAIVICLTGFQLLVSSKNGKIGLLLVLTCMTIQLVLYCWYGHILTEESNG  
ITMACYVVDWHELKVTNQKMLIMLMERAKKPLGLQAMGVFRLNLFTLMKILRSSYSYF  
AVLQQIYKN

>ItypOr3

MPTRNLYPFDASQGWFSWILFVIEAIFCYHTCCVFTLATVTLIGFLKHILAQLRYCGHEFET  
IFDGVNEESGGKHLTLQHFRVVKYHQEILRYTEKVFSTFNVMIVVYTGVTSFILAITGFQIT  
SPETGGEDKIRYTMIIIGWALLFYWICYYGQQIQDEASQIADAIYNSKWYENTNTVVLVRR  
DIIIIYLRTKRVLDFKVQFLGAVNMEVFVAVMRRAYQIFTLILLSVT

>ItypOr39

MHDLWFPFRRETHMNWVIFS NFLMIVQGTCFNTATQATLINLMIYSSSRLKLLGLKLRKFD  
AIASQNGRXILETVHDLIFEHQDLLRFVESLNVRIKYVLLMEFILNELGLASGIIQLIVIDTTS  
YMVSVVTIIILQLFQIFVIAWTANEITIQGSKIADSVMASNWVEQPTNIKKLFLIMVMRAQR  
PLGLTAGPFFNMNANTAVSTVKAAYTYLTFMMNNYN

>ItypOr12

PFNPDDYYWPIFFGEYFATGLSALCNGCVDRLF AKHVS IATGLLKILRNRIKQIMDDDDHN  
VIEAKIKHCVLYYNEVIKYGKVIERQFSFGLFQFLV SCLVICLTEFQFLVATSSGSFGLLFAY  
LACMITQISICYWYGHQLMEESDSVSMEFYNLNWLDM SIKNQKTMLTSKERAKNSITLKA  
SGVFQLNLTTLMTILRASYS CFAVLHQIYTK

>McarOr1

MLKFKV VGLVADLMPNIRLIQASGHFMFNYHADNSGALHTLRLGYSCMNLV FVLLQYGA  
IFGNLVAEKDDVNDLAANTITVLFTHCVTKFVYFAVRSKLFYRTLGIWNQANSHPLFVES  
NNRYHALALKKMRILLICVGMTTILSAAAWTGITFVGESVHTIKDPNNENETITEEIPRLLI  
KSWYPWDAMSGMAYYASLVFQVYYVFFSLSQSNLLDSLFC SWLIFACEQLQHLKEIMKPL  
MELSASLDTYVPKSADLFRAPSATSQDNLIENEYNAKNEELNLKGIYNTRQELGGHFRSG  
TLQTFGQGGGGVGPNGLT KKQELMVRSAIKYWVERHKHVRLVTAIGDAYGVALLLHM  
LTATVMLTLLAYQATKINGVNTYAASVIGYLVYSLA QVFHFCIFGNRLIESSSVMEAAAYSC  
HWYDGSSEEAKTFVQIVCQQCQKAMSISGAKFFTISLDL FASVLGAVVTYFMVLVQLK

>McarOr2

MKRNMSYDNFDYTVFFTHNILMYKIFGFWRPDDDMKREKLYNCYTLICTI IWLLFLASQY  
IFIITNIQNVDEVTATS FVTITFSINLIKMLAIYRNMNRIKQLIKDMNLP MFQAKCARHRDIID  
YTRIYTIFFYICLYFGNTDRHYFWTIVPFIGDERATLTHGWFPYNETKSVNYEITYVFQTTV  
SVWNTMLCLNLD TFTGSLILIGLQCDLLCVTLENLGD FHVENGVL CENSEEYQSSLVND  
KVKFSKTM TENLVVCIKHHKEIMRVSKDVEDIHRVSVFILFLGGALIMCCCLFQLSVVPIGS  
IEFFMLLFFLISILTEQFIYCWFGNEVIQKSSRILHSAYCTPWLD CDINFQKVLLQLMTQTYR  
PITLKAGGLFTISISVYISVIRTSYSYFTLLKK

>McarOr3

MSQKVPDQYFKKHLKWL TWLGDIIPIEKVWYAI PYKLYAFVLLVYVYLYS LLEIIDIVKSS  
DFNSMTFGLSYSVTHILGAAKITILILKKILRDMLIRLEQGYFVPNKARGGEKEQQLVNA

SVIRANLHADIFNTLVYLIIGIRCLYAIKFDKGVYVEVLDEKLNVTTLKHIRTLPYKAWLPVD  
LNKSPAYEFMFIIQASCLVLYGYYIGFLDSLIGMMIHMNNQYLILRNILEHYVELAKNIVL  
NRNPNSVTDSTDYIKLHNGIERQKTLAGPVLVDVIENIAYHCAKYHLAIDYDDEIEKEFS  
NLMLLQFLSSLYILCFQLFQLSLVTNYFSFDCISMCLYLILMMYQLFCYCWYGNVMIQSL  
DISSVIYNTDWLVTNESTKKCLLMMMRAQRPIIFTAGKFAFLSLPTYMAIVRGSASYFMV  
LQQMQ

>McarOr4

MAPSYVFDLPKAFEFKLLLYTGLYPNTGLVKNKYIYLSGLFHIGITILIEISLIIVISIHIDNL  
STITDALMFFVTQIALTWKLTNVCIKRKFCEIEEILSQPIFYNLSQECENIIHYYVKFSHRFA  
RCFRIICIMVCATNGTLPVGGKLGHAMLLGWNPWDESDRIKYLNSTFQLTALCVSACIN  
STIDILTIVLLAIATAQIEILKNNLVNIKYGEKEAKKLFNENVRLHYEILRFVNAVDRSLSSGI  
LSQIFGSVLVICVTCFQLIIVSVQSIQGAFLLIYLLCMTFQVGLYCWFGHYLIDSSDTIIQAVY  
MSDWYEANSLRKAVIIFMERCCKQPIVLRIGGLFPLSLGTFTSIMRSSYSYFAVLRKWYEPE

>McarOr5

MTDKGYTPHFFRTNEIIEVYTGAWMYNENLVAPGKKWLLYIWSVLIYIGAVFFLFLEFLKL  
RDTMKVSNDFIRQCGLISCHSLCVVKFVILVLRHRKIKRLMDTLQDKKYQYEPLGDFSPG  
QRFDEARKLTHWCTIGVFCLYSCAAVSAHISAEVLINKDAKRERFDGNITCYEYMTFYFAI  
PFPSDTKAQCCEMSFIFMHFCIDIYAWFAAGHDSFYAALLNCLRVQVDILCDAFRTIRPRVLK  
RLELPQDLSIFHDDDFPKLEEALYRELTHLTEHLMILLRVADDLEEVFNLITLAQTVSSLIVF  
ASCLFITSTIPLSSPEFFAQVEYFTCMLIELSLFCWFGSAATRASEAISPAIYESDWYGTSKRF  
KQSVLIIMCRMQNPIYLSIGKFCPLKLDTIVMVFKCSFSYTVFKAVGE

>McarOr6

MPLSVFFIYFLIILSSMQPFAAIAYQFYVGIEDMNIISEAFIGISDLVGFLFIYICFRKHRGLIKE  
TIKASAVFLKYCSPNVMEKAEVEVQTYTKGLLIYFSIGLTFNGLIPLYDYENCQRRRLSDY  
YRAHDPCGMPRIWVVPDARKPVIYYLVFFLHANACLNICYGVLCITMTLVGLLIHITAQIK  
NLRQNLQVFDPELPGDCYSETLVKLENKLFKFCVKYHIIINYTDQVFAAFNMLLIVHIS  
LTSLIFGVLYQIVTVEFTEKLRVVMHLGGWIALFLTCCYQGQLLDESTTVANAAYQSK  
WYNGPTYLRKNLCLIMRSQKPLKLRASIGVISLETFLSVIKTAYSYFALLLSIAE

>McarOr7PAR

VLLYCTTEFAFLCKLMNFVLSKKEIIELEAILESRLFTVDTPEEEAIKTSTRQIRKLANIYKT  
LCFLSVTFYALFPLADGGREAQKLPLPGWFPFNVCNHYYEVFIFEAIGIGLCAWFNSALDL  
LVVIMMILGKAQFELLRHRLMNIAIYGEDGERRRRVKMCAQHYKSILRFVMLTESIYSNGI  
FVQFMSSGIVICFTGFQMLIISLKSIFVQRILYLSMCMYQIVMYCWYGGVLTDSNNKITEA  
CYLADWINCNVILRKSLLIIMERAKYPAKIRAAANIFTVNLETLLTILRSSYSYFALIYSIYDTK  
NETK

>McarOr8

MTVPYADDFHTNRWILYIGGLWWPDTYKSIYHKILYMSYCAANFLFCNLYFTPTEVLSLA  
STYKSIYHLIKNFSLSQMHVLGFTKVLFFVFKGYKMKAIISVLEDKKLHYEDCDEVNFHP  
GMLTNKYKKIGRVAGIYLVLPVILLAYTLSAIAALRYVEGDSNHQLPERLPFYSWMPFS  
YDTPKKHLIALVYQATPLVSYFSFVIGMDFLFANIMNCIAMNFTIIQAFRTIRERAAIRVKE  
PLKVKDELYNSEPLQRELNKEMRKIIQHLQTVYRMCDELEDVHKYTLAQTLSQLFILCAS  
FYLTSPFPGNQLVIEGIFMIMVISPIVFCWFGDEVTHQGGEISVAIWQSDWLGATKSFKTC  
MIINMIRTQKPVYLLTGKFAPLTLATLVSIFKASYSFFTFLKNTSNQ

>McarOr9

MTILGIWPVKANWFKKLRLEYVYHRISFWILFEFYYNADNKNFVQVMGKNFSETAEVLG  
VVIVLLITSFKVKICTSPKIKNLLQQIEDAEKIIIETTELDRNIYNQHIKMSTKENTVQLMIG  
VLAISLYSVRPILANRGLEPESKNKMFIFASWFPFDEQTYYPAYLIQFISGLYSTGYTISTTM  
FLFNAMIFARCEIKILQNQFVNFTYYVKKDAKDNCRTYEESQKVALEDRLKHRKIINFVN  
TLDTSFKTILLDFTVTSFQFSMVVIQMVQRSQLDVAVVSMVMYLSTLALQLYLVYSNAH  
EIIIESNKIAQAVFESEWYDLPNDVKKAFVIIMLRAQKPLYLSIGPLYQVRCDMLFKILHALY  
SYICHFLEVNYIVTIV

>McarOr10

MSSYPKKLFFLNRWILCCVGMWPPDNQNKLFREFLYKVYAIAAFFYIMVLYNVLEIISLIYT  
YNDTVSFMKNVSAVCVHLGAAKS VIFYL RGDKV VEMMITLESEELRYEDCEARNFYPG  
KISKCKITVAKLTALCFVMVHIVLLSSFIPPILQILLCIKRDATVLPDRLPYLIWIPFKMDTV  
SRFTLALVFQIFGMFGGAYNISGMSIFLGLMHCSQNLVIIQGAFLTIKERSVKRIKGPALA  
ADRLNNSACLNAAMNSEMRKVSRLNQTIFNVCWDLEREYKYLMLLQVLITLLILCSSLYT  
FSSATPNSKLFYTEIYISAMMFEPFMYCWFNGEVTHKADEMSNSVYQCDWLGTDKKFKT  
SLILNLTRSMKPIYLTAGNFVPLTLATFVAVVKGSYSLFTVIKGSN

>McarOr11

MYFNSSLGVWPFVFERPDFRLWQMMYKMYSNLMLVFGTYVICTQYTQLVMLLQEEEEIW  
VQEIRNLCLTLLHSMGLAKVYAIRSDNLKELISEALKVEEDIYRRGDEDIMEIYRLYAWHS  
RVSNI AFLINIAIETCFYAMHPLYVGELPHFDKATNQT KMIRALPMSAWVPFDIQEQYLEAY  
LWQSVEGTVTASFVMYTDIFSFLIIFPLGQISILSHVLRNFDHYVKKAEKHGCDRDEASF  
FIARECVVKHQDIIRYICVFNNAMKYIMVDFLQSSMQLATIVIQLFGSELKMVEVIFHGEF  
AFCMLMRLMVYYWYANEIMLKSSDITLAIWEGVWYEESQRVKHMMLMIIRRSNKPLAL  
DIGPFSTMTLQALLGILKATYSYMTIMYNR

>McarOr12

MRANALLGVWPFIFEDNPKLQKIYDVYSRCTFIYLLFIITAIKLI FLICDEVFVIQEVIANL  
CITLLYSVTIMRVWAIKTPRVKNIIREIIITEERILKSKDET VITIYN SHAMQSKVSNIIFLVNIF  
LVTALYFIHPLYVEDRAKFYESKNITVIEKPLPLSSWFPFNEQEHYLVTYLWHVLDGSIGAS  
FVYTDIFTFSLIIFPLGQLKILIHIMSNFEKYVDKIQNQLDCSPEEASFTTLRECVLKHNEII  
KYINDFNTAMRNIMVLDLQSSIQLASIVLQLLVAEFTILNFAYSQGFALSMFIRLLVYYWY  
ANEIMVHSSDVAFALCTSNWYEQPEKVKKMLV VILMRCNKFLCLEIGPFTTMTLGTFLGIL  
KATYSYMMVIYK

>McarOr13PAR

NTVTSFKEDFFHANRVIYRICSLWLPGKEIPLQLRVMYLT YVFAWYFLFLTFLICEFLIFKDM  
LQEVSKFVNYFGMLFTHLVGTLKLSVILQYKRINNLMSILQDPEYCYESLGDFQPDVLLH  
KSKIISFIVSVSTFVLYSFGISAHISSHIVMNQVVKNP TLEKNMSCVDFVPYFYFTPTGTT  
KLQCESMFLMDICYFIHATIIACHDGVFAGLLNCLRTKLVILGGAFKTIRPRCLKRLNMPT  
NFTVLHEEENPEIEKVLYAELNHCINLHILLQSRDDIEHCFSYVTLAQSLASLFILASCLYN  
SSTVPVTSPPDFFSQLEYFVCILTQLSLICWFGNEITLASNHILSLYEGDWFSASPRFKRSMIL  
TMCRMQRPLYLSIGKFSPLTLATLVAVCRGSFSYFAVLQSI

>McarOr14

MDGGILRVQKLFMILSNKWEVNTKSVLINKLCRIQGIFFESYFILFTLYLPFNLLLHRKCML  
IFYELGGYFLHHTNIIIMNILFRKNAMKKTLKYIKNYEQVEYSKETQDSKDIYGYYSLLNA  
RLGKYVIVFGTCIAGISWYVSTISYSIKENTEDCAVLEGVMYQVWYFPKTRYNWL SIIIFDL  
SMAYIAVSMHIFNRMSPITLVLFQLAHIKILANKIRNIDTHAEELASLHDVNIEQALNIAVDE

CVKSHQEVMSLMDLLLQATKEMMLIGFFSSMELASFIIQLFTAASKYHFIRCFIIFPIDLLQ  
MLAFFWFADEIYVESTTLSNVIYNEVDWTRYTKPLRMKLIIVMMIVAQKPIYFNATGIGEM  
TLEKFKCILNSCFSAVTFQTMYYN

>McarOr15

MEKLVHIKLLRRMMIICGQWNFKNYNNPALTIYRAYSRFIIYHVIFMTQMILLTIAMQWDC  
RSRVIEMMLLYSIHQHLVMIFLTKIYNLEKSLNYMMDYERVKQAGEDEKNVYFKYAR  
VNNNMNVLIIVCILTAIMWYMTSIRNTFTVRGNEVCPISKGLVYQIWYPFNFDNQYWLVI  
NDLIFFLNVVILLTYTKIISITVTIFMLGQIKILQEKIRNLEQDALVLRINRTEYDESLLSLK  
LCIKRHQEIGWFMEVLQDSTSSIILTQYFSNTFEMAAFLIQMLTEKSPLYLIIRSFIVFCMVILQ  
VYIFYWFANEVQIESTAIPDIIYSETKWTENDQIRRYLLLMMTRSQKKSFKSAAIGDMSLA  
TFTKLIKLCYSIVAFFRTAYDL

>McarOr16

MSGQTQNIFLHAQRYIMIFVGKWIYDFGSNTKNRIYYIYSVLVELYFLFMTQQILVSMVIYR  
GCTERVGELICYIYQYTNISNCSFLSKRSKIRKIFNYIMDNEAEHLKHGTADVYLKYAKVN  
RKVIVLFLVLTGVAGAIWYILVVRDFFAEENENCLILRGLNFQIWYPFDFLNRCYVITLLN  
DILMYTSAVGVHIYNKISPVSMIYILGQIKILQEMLRCIEKDAISMHELQGEKYEEAILKNI  
NNCVKMHQEVKFMGLIDKGCKEIVLIGFFTNSLELAAFVIKVLMEEDVFGALRTIGILCM  
TVTQLFMFFWFANEIKVESTYISDVIYYQTNWISYDKHARRHLWLMMIRSQRPLTISAAAI  
GDMSIDTFKRIIKLCYSIATFFKTVYM

>McarOr17

MVKPIETVCCRTTLKILRTCYMYPEEGKEQNPGLKLLKWLTLMLSSVTFIGSFLHLIISLK  
DEDYRHLDVDFSITLSMIATYIFTCCFFARVKFASKFYMHLSNLERLEKPLDFEKKNERLEK  
FALYHYIYMELLVASLLLFSNVIKGAACKQENLEFDLHEVCGLFTYTWMPFDIDYFPVKQI  
YLFLQLFGTHYLYLIAGTMAWTVVEAIQQIVLRLRHAKYLFTEAIKEVDPVLQRQKFNRA  
VRYHDAVLGLDDRLNGTFGVFMFTHLGMTAPILGTAFFAILHGGSGSSLFICLGGWFIGVSM  
DCFSGQHLQNESIDIARALYDTQWYNCSQDIKRDVLFVLMRCKPMYLKATSFGIMDRV  
MLLGVLKATYSYIALLTQTQ

>McarOr18

MDEIKKEEPFTHSLKMLNVMDAFPLEHNFFSNGIFFVRFWILRTMSFCISCVLPTVHMVTS  
VKDGIKLIISEDLSVIVGTMVSLITTCIFVFKRNSWSKLLSDIADLKIYGSFSDFDIVKVKLN  
LFSRIYFWYCVNATFVYGSVSFIDTSQCEEINKLGKEWREVCPTYLPMRPLFDANIQWMR  
VSIFFTQMFFTLSSLAPSALACSIIFQSTGFIIAHIENLKKHLVGAFDSTDVQETSNILRYCISY  
HNHILRLSARLQDLVGTNISHVLLMSAVVFAGIGNQILKTKPVGGTLYFIGYMIALFLLCHS  
GQRLIDETASIGSAAYNKWKYKNTSMIRDTLIIYRSQKPCTLEVLSLGSLSNYPLFLLIKT  
SYSYLTLLQTA

>McarOr19

MFKIQKGAPFYSTLLALSFLGQIPVEFKETYSKSFLVKCILSRFIGFVLVSVAPILQYVMATK  
GSIEVDISENISITISSIGALLTGFTLTCQYKKWLKFFEDITDHKAFGKPPDYEDLVKNFNRF  
AFYTIYCTGSVPVYAVTVYFNSMRCDEAALKAGFFCKSFTPIWLPIDGSSLQLRVIIYIVQM  
LLGGTIVCTSAVINFMVWESTEMLISHINSLKIHFNKISEKSTDKERSEQLGFCVRYHNHILR  
LSSRLNGLIKWTSGHMSLTAALIFASIGNQISNSKSVGAFLYLIGYVGALFFICHAGQRIKDE  
LMSVGDVAVYNADWYATDVKTIRSLRFIARCQIPFHYEAIPLGVVDYPLFLMIKTSYSYVT  
LLSQT

>McarOr20

MIKIRDIVCCTVSIKILQVCFLFPLKGKELEPNYLRFIFFFLMGFSSLTVIGSFLHFIISIKNH  
VYYHIDLDMAIMISMFTTYSFSIVFFFNISAVRLYMTLSDFDEHGKPRNFDKRTKLIDKVV  
TYYYIYIEFLIIFMLSTSNVSSSGKCKKNKKYGLNEVCGLFSYTWMPFEIDYYPVKQIYTI  
CQLVGTHYLILAGVVSCLMAETMEQIITRIHHARYLFLEAIKEKDYAKQRQMFNTAVRYH  
IGVLDLEDPLNETYGFFMLTHLAMTAPIIGTALYSILYGGSGSSTFICLGWFIGVMKDCCCG  
QRLQSQSNTVPIAIYDSEWYTCNEEIKKDILFVLMRCRRPMYPKAIISFGVLDHVMFLGVV  
KAAYSYIALLSQTT

>McarOr21

MSTDRICVPFSTSIAILNFNLLFTHGKSKSMLIEVMGWSLRLLSFINLCIFPIHHLITSIRDGIE  
VDISEDISSAGGFIIVILLCLFKFKEREWKSLINDIVHFSKIQQKSEFEKLTKKMNKISAITY  
SCFTIALLIYAIVVYNSTGHCRQMNDMGLHEFCGSFTSIRLPFEGNSLIIRLPIFLTQMFVN  
ANALMSAAHITFFVYEITQYLVMHVDILKQNLQVYDVGSSSEEISQKFKSCIMYHNRILRL  
MIRLNQVTKFTVGELSLTAAIIFACIGNQILKGSSMAGIAYFQGYVTELLFLCHSGQIIMDQT  
ESIGASLYQSKWYEVEAKLMRNVIPVLRRCQKPMTLQALPQGNFSYALFLMMMNSAYTY  
FTLLAQTT

>McarOr22

MATRYPADYFGMIKIMYGIAAIWLFNPNGLIVKCLKYSWTLILYSIVVTFVIFEYIMIEVM  
FKDIFTLIAQMGLLLCGHISLLKATVLIKNHKKLAEITDFLEDERYHYKSVGNFDPGKLVV  
DEKRFTNFKMLLVCFGLVGVSPHLAAEKIHHQEVKGNYSFENVTCYDYLPIFIFIPFPSE  
TKHMCEVAVLFMDMSISGIAIIIACHDGLVLLNCVVRVQFVIVGEAFSTLRERVLHRLNLP  
EDFEIFYDEQHPQLEAEYKELNVVTRHYALLLKISEDLEEIFNKIILVQTLCLLVFATCIYA  
GTTVPITSPTFGASVQCFSCVLAELALFCWFGNGVTTSSSEGILLALYKSDWFSASKRKFSS  
MILTMTRVQKPVIYITLKGKFGPLTLVSLVSVCKASFSYYTLLKKMNI

>McarOr28

MNEGFLKIQRICMILLGKWQFDQKNLMQNKLYKIYGWFIHIIYFAVIQSMFVIKSRWACE  
DIITKLGTIYLNHMNVFMTNLMSNTDHLKCLVSYILNYEKITYPKETDFVRKTYDFYCAM  
NYKMTALYIVTPSSLAIVYYAFEVTFTLKDENDPCAPNKGRIYQFWLPFDTKNYFYVAMP  
FELLEITIVAILNTYKNLIPSSMSTFQLGQIKILQEMLRHVDDEAIKLHTNQHIEWEQAVDIT  
VTKCAKKLLEILSLMDILHKATGPLMLLVFSSNALETAIFIRMLRAKTIVESLISVGVSFIF  
VQLLSFFWQANEVYLESQNIHVIYNETNWVDYNVSVRRKLLIMMTKCQKPLSFQSGSI  
GSMTIETYKKLVKSCYSVVTFFTSYG

>McarOr29

MGRKFLKIHRFYMLILGKWKITPRNTLQNKLYKIYGWFIHIFFIGILQTMPYINRTKINCWD  
VITKRGALYMICNNMFIISLISNSVNMQKLVEFILNYEKLLYPSEKNFVQKTYDFYCKMNY  
NIVMIFIVIPSFFAYVYYGFEVILTFLKDPNDPCFTTKGLIFQFWLPFDTKYFYIAILFEFFL  
MSLAICFNNTYKNLIPCSMSTFQLGQIKMLQEMLRHVDDEARELNASQCVMDEAVDAFV  
TECIKKLQDILSLMNLHKAATRPVMLLAFFTNILETAFFMIRMLTAKSDAEAITALGVSSVIF  
IQILCFFWQANEVQLESQNILDIVIYNETNWVDYNISVRKKLLIMMTMVQKPMSEALGIG  
SMTIETFKKILKSCYSIVTFFKTAYN

>McarOr30

MKLHKLRLQNHLILLGRFEESFGNIFVDKLYIYISWFISCYYILMLQSIPFIVLTKWECTE  
LAMKMASIFLHHSNSFFLSRLAIKPPMKKTLSHILNYENLIYPNEAKDRQNKYNHANLNF  
IVSLLAVVLPQYGWLYYYLEVKRSYIEQENPNCALKKGLAYQLWYPFNVEKYLYIARIF  
DFLELLMATIYHSFNKSLPIGMACYQLAQIEILHLMLRNLDTDAKKLQHGNIQRDEAVETL



LNECIRRHQIIDFMGLANKAMRTIMFIVFFTSSMEMAVFLIQMITAQTTTDRLLTCGVSCV  
LALQILSFFWFANEVFLQSMKVSEIYNEMNWVDYTIGQQKLVIMMAQSQKSLFRATM  
VGAMTLETYKAMIKSCYTLVTYFKTVYE

>McarOr31

MGCRFLKVHRIYMLILGRWKVSSRNTLQNKLYQIYSWFVPIFFIGIIQSMPIIIRTQMNC SYI  
VTKRASLYMHSTNILIISLLSNNANMQKLLKYILDYEKLIYPSEKKFVQKTYDFYCKMNY  
NIVTVFILIPSIFPYIYFTLEVTLTFLKDPNDPCATTRGLMYEFWLPFDTEKYFYIAMLVEFY  
ELFLAVCFNTYNKLIPCGMSTFQLAQIKMLQEMLRHVDEEARELNASQCVDMD EAVDRF  
VTECAKKLQDILSLMDRLHKATKPVMLLAIFTNSLETAFFIIQMLTAKTTTEAIIAVGLSCVI  
FSQTFGFFWQANEVHLESQNISDVYINETNWVDYNVVRVRKLLIMMTMVQRPM SFEALG  
IGSMTIETFKKILKSCYSIVTFFKTAYN

>McarOr32

MNDFLKIQRICMLLLGTWKLDPKNVLRNKLIKIYSWFVIIYIGIIQSMFVLKSKWTCIDF  
IKKVGTLYLNHTNVFITSLMSNTDNLKILVAYIMNYEKLIYPTERYFIQNTYDFYCKINFYIT  
AICIVAPSSFWCCLLCYRSYLHIFGGMKNDPCASMKGRIYEFWLPFDTKTYFYMTMPFELF  
EILIAVVLNTNNKLIPSSMSTFQLGQIKILHEMLRQVDDEARELHESQHVEFDEAVDLLVTK  
CVKKIKNEILSLMDIMHKATRPLMLLVFSSNSVETALFIIRMLTAETVGEGLVSVTVSFMIFT  
QLLTFFWQANEVYLESLNINVIYNETNWVDYNVSVRRKLLIMMMTQCQKPLSF EGLGIGI  
MTIETYKLLKTCYSVVTFFETAYD

>McarOr33PAR

MDPVDKMSDYFKHNMISFKYTGIVLNLFDVRRSLLVIFYSVIINSLFMMSPQVCHVIYM  
YKARNNVQAFAD E FYVSLASLLVVLKSYSLKNFDIHKCWKPWTLIFFKQKRLSAKANT  
AGYGNMEMIYWLYATFALLYVLLLLISVLLERILQGTKVLPLVVCYPFEVNVSPVYELMFL  
YQAIALSWLVIQNFNLDTFITGLLTVAAVQCDLLCNDLENLTPEKLECCQKGEENDIMDEKL  
VDCIKHYQEIRRFVNDISHCFSMNIFQQFSCSVITICTTLFEFSTKEPLSQEYFAIIYQSSIFIQ  
LFIFCWTGSELTEKSKRIPISAYASKWEDASKTFKSNLLIFLHNVQRPLEI

>McarOr34PAR

IVNMIMVLGDIEKMTEASFLALTHLVQVMKLFYVLRyenKLLINSINRKSFPKNLEQY  
VILQKYVRESNIISKTFLSAGFVTC CFWGV SPLTQSGDIVLPLAGWYPFD TDRSPA FEIIFAY  
QFVASVTNALSNISLDTLMSGLIMVVC AQLNILNDSLNRNIRKYAEAESDDGRAVSREELQR  
RMDERLVECVVHHKHILEFSNEVTF LFTNSILGQFIVSVVIICITLFEITLLPWGSLKFFSLILY  
QFCMLLEIFLLCYGNEVILQSMQLTKFAYFSDWTD CSTKFKRNLLFFMTRSQVPLRIYAG  
GFFTL SLET FVKILKSSWSYF

>McarOr40PAR

IHTVTAGEYNHIDL DLSYVLSMTSGFLLFTLFSFNITTATKMYMFLSEFKEFGKPPKFDKYN  
AFLNKVAKFHVIYLNINITLFAAGSNVFKGAQCKKDNIELGYKEICGLVTNTYLPFDIDYFP  
LKQIYVGLQFFSIYYVYTISGTITFMV METMMHIGFRLDHVKQLFDEAISEKNVERS RKR  
NFAARYHARVLELEHEVNACFSYAMFSHMILTA AIIIGCAA FGVMQSGSANPFAVCIGWFN  
GISFVCLSDQHLINKSLEVGTAVYSSKWHQAHP SLQRDLVIVIMRCQKAMILRSAGFGVM  
NRATILAAVQASYSYITLLSRSP

>McarOr48

MSKRIMLLLGLWPATSSHDWKYICYKAYFC AVR FN YGVFIITLIMGIFSKYTLNAGPLEKA  
DIIQNYLLYILLLWK MILITTSQILKLI ECISEREMHIMNLEEDIKNIYAKNVN YNFKIFLIVT  
ATIVVGLTQFCILVSFEIHGLKNNIERKLPLPEWFPFN VGKHFLTSYYFQVFNRIYSGMIIVA

MDSMYFSLIYFPITRLKILGHNLMFFQELCNKNYSETPDNILKALILEHQDIMRYVKDFNR  
LMKWYLFMDFLVRSYHISLVLFKIMALQEFYGNNGSDGVLLLTFSINYLMVLLLQMHIFY  
HSNELRLESMEISSYIFQGNWYDQSPSCCKSFLIMMRAQKPLEIHIGNLNTITSYLIVKVL  
KAGYTYVILSRK

>McarOr52

MRYEFLKIQRICMLILGKWELNSKNELINKVYKIYGWVPIYFIGIISIPFILRTKLDCTDIIT  
KIASLYMISTNVFVISIVSNSANMRKLVSYILHYEKFIYPTEGFLYKKTDFYSTMNFNIITL  
FIVCPSSFGIVYGYETSVTFWRDENDPCAPKKGLLQFWLFPDTEKYFYIAMMFELFEVC  
LLVIINAYNKLIPNSMSTFQLGQIKILQEMIKHVDEEARELHVSEYFEMDKAVDILITKCAK  
KLQEISLMQILHQATRPVMFLAFFTNILETATFIIRMMTAKSAGEGIIAVGVSCIIFIQIVSFY  
WQANEVPLETQNVINVIYNEINWVDYNVRSRKKLILMMTMCQKPLYFEALGIGRLTIETF  
KKIVKSCYSIVTFFKAAYN

>McarOr54

MVLFPKNDHFKVTMYANALLGVWPFIFEHNPFRKLYHIYANFTFIYFMLFIVTAYMELV  
VLLMAKELRVQEIVGNLCITLLYSITIAVYAIKSDSVKNLIREVIEVEEVIYKSDDEEVIGIY  
KEYTHSHSISNIIFLVNITIEIFYFTHPLYVGETIVIDEATNATKVVRAALPLSSWFPFDEQEY  
YHLTYGWQMADGTVGASYVMYTDIFTSLIIFPLGQIRILMNILRNFDKYVKMTQDQYGY  
ERDEASFLTARECILKHKNIIRYINEYNRVMRNMVDFDLQSSLQLASIVIQLFVSEVRLFNV  
IFHGEFALCMLIRLLVYWYANEIMVQSSNVALAIWDGGWYEEPQVKVHMMMMMIMRS  
NKPLVLDIGPFPMTLSALLGIMKATYSYMMIIN

>McarOr56PAR

SPHVTTVMSLQPRSKGIFKNLTCYDFMPYTFLYPLFPSQTKRRCEIVALYMDIAISGVALGI  
ACYDTFFAAILNCLTAQLTVVNKAFTIRQRVLQKLKVASNIKLFYDDENPRLEKELYAELT  
FTTRHFVALLQIAEDLGKIYNLVLGQTVECLLIFAACVYIATTVPITSPEFAAASQYFAAVF  
VQLTLFCWFGNGVTTASEDILLALYECEWYSASRRFKSSLLITMIRMQRPVYLTGKFGNL  
TLVSLVSVCQGSFSYYALFKKY

>TcasOr1

MMKFKVTGLVADLMPNIRLIQASGHFMLNYHADNSGALHTLRLGYCCMHLVFLVQTF  
CNFVNLVLERGDVNDLAANTITVLFTHCVTKFVYFAVRSKLFYRTLGIWNQPNSHPLFVE  
SNNRYHGIALKKMRLLYIIIIWTSFSAIAWTGITVFGDSVHNIKDPENENLTITEPIPRLLVK  
AWYPWDAMSGMPYYITLVFQVYVYVFFSLAHANLLDSLFCSWLIFACEQLQHLKEIMKPL  
MELSATLDTYVPKSADLFRAPSATSQDQLIENGTNPAKKNEDLKGVYSTRQELGGHFRGG  
ALQNFSGGGVGNGLTKKQELMVRSAIKYWVERHKKHVRLVTAIGDAYGVALLLHMLTS  
TIMLTLAYQATKITGVDKYAATVLGYLLFALAQVFHFCIFGNRLIEESSVMEAAYSCHW  
YDGSEEAKTFVQIVCQQCQKAMSISGAKFFTISLDFASVLGAVVTYFMVLVQLK

>TcasOr4PAR

MYSENKDFVLTIKPNILFLKIVGLWPVDNNDVYRIYTLIVTVFFMGVDFTRIMNIFFVYT  
DLKVLTAIYLTVDITVLVKTCLFMSNIKTLKRLIVTINCDVFPKTDHQQQLVQSGLKA  
WKVSYMVFWSLVFCCLVMWTVSPIQATPAGRKPLPLPAWYPYNTDITPFYEITYVCQVIS  
MWFLATANMNMDSLIAALMIYVGAQCILSDNLKKMKTFSKIKEEQAKFNQTLIDRIEHH  
KKILQFAYDCNASYNFILAQFFTSSLAIALSMFQLTLVDPLSMESFPLLSYAFGMALQIFLY  
CWFGNEVEAK

>TcasOr207PSE

MVEFNGPFIMLRTILFIDMNTYKILKLFNVLLNVIYSLIHCLLVYHMFKNLNINLIIRYGPV  
LFLILVIVGAVFSVYLEKDILEIVTLFRKTRWSLSMIKKDARIKLEKKCKIINIFILFLVLLIIST  
ITINAPYFGDQRELFICIQVFEEYFGWEFFIPYNFFVAFPLYYNFFKLWMTFVYGILEAQL  
QFFILEEYLCGTFETDFRKNWEYLQDTRYQQEIGTSLRLCIAHHINLKKLIKMIQNVTLMV  
MPFFLVLGVLILISSFSFIINFADTMTTIAKIRMVISAIMVGITILLSWIGQQVIDVTSDFVTL  
GGASWYYYWNQKKYXKTLLMFLTNSIKNESIVLAGICADYGLCVALLRLSVSYALVLFNLR  
KSTLVZ

>TcasOr59

MDEEFLIGTFETEKKFLRYGSFYPCGKRIKFIFLGLFMFVYSWTEFLSMITVLFVERDNLTK  
LSETLLFCMTQAAFLFKLVNFLYHNKTMLRIESILKNPILNCLDQFEKNIEKYMIRVKYLA  
RLFRILCILTVSFYGLFPFIDEDPDHMLPLPGWFPFDVKTHQIELVIAQTCGIAIGAFNSTLD  
ILPTILITLGSAQFDILKIRLENITSVDTSKSWLVKKAIKKCVIYHTILLNYITQIEILFHKGIFV  
QFTASVVVICLTGFQMLVISVRSIQFILLMIYFSTMTCQIALYCWYGNELMYRSMGLSDAC  
YMSEWNKCDTSVCKSLAIIEMERGKRPVVLKAGNIFSLKLTTLMTVLKSSYSYFAVLQRLY  
ATSE

>TcasOr63

MGFMIQDYDLRNAFSLERKLMVLVGFYPKRDNKHEILYWLSAFFNLLISYGQLTTMIIQM  
VFDRSDLSKLTESLLYFFTHFTFLCKLLNFQYYSKDLIEIENFLTDPIFYGYSFEQLDIKAKI  
RSCAFISNAFRICCTFTCSFYCLVPFIDESRKKILPLPGWFPYDTTNYYYSTFFVQSLSLFISA  
YCNTAIDILTWKLITLASAQFEILKENLTKIDYEGGFNETKGALVRCITHHAKIVNYTERVE  
AIFSKGIFLQLFGSVIVICTTGFLIVVPIPSVQFAVLGTYLCGMMTQVATYCYYGHEVMTT  
DAIGMSLYLSNWyASHVKIRKIVMIFLEKTKKPTIVKAGNFITLSLATLTQILRSAYSYFAVL  
QRLYKDSZ

>TcasOr67

MDFTIRDFDLRNSFSLEKLLLVLGFPYRDKKHEIRLHQLSAFLNLLLYYGQLTTIIIQMV  
DRNDLSKLT DSTLYFLTLFTFLCKLFNFQYYGKDLIEVEKSLTDPIFYGYSFHKLQIIKAKVR  
SCTLVCLAFRISCTCSCFIYSVVPFIDRSGQKTL SIPGWFPYDTAKHFYITFFLQSLSLFISAH  
CNSATDTLPCKLISLATAQFELLKDNLR TIDYENSFEETKHALVKCITHHRKIVNYTKRVETI  
FSKGIFLQLFASVLVICTTGFLVIVPFGSLKFAIHGIYLCAMTAQIAIYCYYGHDV MITSDEI  
GTSLYMSNWyASHIKIRKIMVIFLEKTKKPTIVLAGNFITLSLVTLTQILRSAYSYFAVLRRL  
YADDZ

>TcasOr70

MPSIIDISFKININVLCLAGLYLPDKFKSLYRVYTYLVYVFIVIPVPTLGCVYLLAQEKITFRQ  
IADNLFIAELGCFIPKYWPLVRHAERIKRCIHYSAPIFKTDRKEHQEILDDCIKVCHQWS  
AFYFASVTAGFVSW SIRPISWENHILPTDIWLPDPHTASSAKVASVYFYLVLGKGFGLGIKI  
LKNNLQHLGEYVDEELASLEPCRKAQLTYQKIRQCVIHHEHILAFVEEYEECFQSVALSQF  
VGAVVIFCVSCLQLTIVEVVS LDFLAMMMYFIAMLCQVYLYCHFGTILYDES DTISDAIYLS  
KWYEFDKRSKKALCILMERLKRPM TVTCGKI FTMSLV TFTMILRRAYSLLAVLENYNIELN  
Z

>TcasOr27

MLETQKIVFHSFKLVNTVLSLIGLYPPKNYSILYKIYAVILFLAVHTPQLVLGLLHYFLMGDF  
TSIDYSDFVTVGMMFYAFKLLPFVTSVTKIQKCINYFDTLGYKILKSEEKIHEDCVGSCRRN  
TNVFFVGCCLSWMGFVAQVFLRDEPQQPLKVWFPYSRDESPVLFYCIYILLIFGPGYSVL  
ACGTIDPMIGGLAYHAAAQLQRLKRNQLYLDEYIKEKNVKGSKENKRGVIYEEIISCVQR

YQEIATFVDLFDKDSFSQVVFSQFMGVSFLIGLCCFQIITATEVDINRVITANYIWWILFQIFFY  
CYYGTMLIEENYTLTNAIYLSNWEYSIPEQKALFMLMERSKKPMIVTAGKILDLSLDTFT  
MILRRSYSLLCCLKZ

>TcasOr36

MKGLVEKSFRVNLVLMQVMGFYPPQKYKSLYKIYTYVVYCAFTTLIPVLATLELFLAENIN  
LEQISDNFIVCEAGCFIHKYLPFVRNADKIKKSLFLIERPMFHIYTKRQEHIIEECVAICRRN  
CRLFLTCTITVINWSITPFFLPGNNLPVEIWSPEFHKASRKFYFLSFVYIVAGVGNAAVSSG  
VIDPLLAGLISHATSQKVLKNNLQFLDEHAEERIASRNISFIERKRFKADFIYQQIKLCVNH  
HIAITEFIDVYEDTYSSSVFIQFAASVVVICISCLRLSMVEPFTFTFFVMALFLWTMLCEIFLY  
CYYGTILYEENHSLTNAIYMGKWNNDIKSMKALVILMERSKRPMIVTAGKILDLSLETFT  
TILRRAYSLLLVLKNYESTPTEZ

>TcasOr40

MSSLIQESLHINLRVLEFFLLYTPGEPTNFQKLRSSILFFALMFHVPVLSGINLIVGKHDNPM  
KLVDNSFGFVGLSCYIAKLWPLIGNRSKIKVCINYLDKPIVELRENQKILQACSKICRRNS  
NIFLYYMIISVTGFVTKPFLFEERGFPVDVWLPTSLKDRLDVYWGFIYVSIGVAYPVIASG  
VLDPLIPSLCLATGHLKVLNDNLEHLDEYSSEENGSKDSNLYKNIQKCIKHIEILNFVYN  
HQKCFSLMVFSQFLGSPMILCFTCWNVSMREPFSLWFQSLAYFLGLLLQLFFYCYYGTR  
LSEEFHVTTAVYMGKWKYDVKSRKALILMERSKKPTIVTAGKILDLSLETFTIILKRSY  
SLLAVLKNQNZ

>TcasOr32

MCLSTSEQSFSINLKIMKLCRLFPTEGKFKYKIAYLLQFLLLLPIPIGLNLHLLLDENLDM  
EKVNYNAVFLAQVTCFVIKLMIAIANSEKIKKCITELDSPKFAAVRENHKKILQHCIVCKR  
NTLIFVVFVICGASSWATKPLFWSTRNLPLDVWFPLDTTSTPVYCSLYIYLLIGVYFTSFAN  
MVIDPLIAGLAYHATSQIKILKDNLQHLNNVYANEEITSSKNKIIYMKIKRCVQHYDDILSF  
VKEFEFCFLAIFSQISASVVICFSCLQLSKIKTFGYFYIQLVIFYFGVILAQIYFYCFYGSTLF  
EESSIINAVYSSKWDYDFDVPCRKALLILMERAQTPITVAAGKIMDLSLVTFATILRRYSLV  
AVLNYYQZ

>TcasOr52

MSQIDLKEAFKQNIIVLLKAMGLWFFQNERFYKLFKCFVQGSVDFDSTSLIYVALNIRIKNV  
TDTIYSLPGSLEVVLQAILFRKNFHLIRKSLNNLKQKEFQPKNDTQEKILKDSIALSRRVYF  
SFFWLVFVMIGMWMVPLTKKGKYLPTKYWIPFDYRPLVYVYELLYVFECSCIFHAFSNVA  
LDTFFSIAMIQIGAQCVDLCTIRNMDEQEKTNTMDRILIECVHHYRLIEDFAKSIATSFKEI  
LMVQFVCSLMLCVSMYELSLSEPMSGHFFQVLLFQISATNEIFLYCWFGNEVIKSERLFY  
AMFESKWDYSAATHRKNLMIFAHQVQKPISELLVWNIFPVDLKTFGGLLQKCWSFFVAMK  
NIQEIQEZ

>TcasOr48

MPHATLSKMVVQKIDLLEPFDNVTRLLKILGLWYSPNETIVYKIYKNFVMATCFLYTLTCT  
VYGFKFMSFETLEIAFGAVEGVLSLMLFRKFKQIAESWQQIRQQEFQPRNEHQRTVLKW  
YIEVTKSLFLVYFFGVYIGCISALTVSSWLRHKDFPTDHWFPFNRRPFLYQYIYVHITVGF  
YLTAFLNCASDSFYLSLLHITAQCEILADTLKNVHDLHLKLNAAKKNVSGQKGEDEVMNQI  
LIECMKHYNLIKKYTSLVADCFKEIITLQFVPTIVMICIAMYKISTLEPSNTQFWFAFTELG  
AITQIFIYCFVGNLVTSTSQKLFYATFESQWYNASQKFKKNLITVMMAVQRPVIFYGWNIF  
AINYATFKSIVQTSWSMCAVFRSTQDLZ

>TcasOr49

MVVEKINLREPFENVTRLLKILGCWYFPNESLVYKMYKNFALITCCMYTVTSHIYSFKYMS  
IDYDKAYESLEIGVGTAEGVLKGIIFRMKFQKITESWQQIQPEFQPRNEKQKMLLRRYIY  
VTKFLFKVYFFVYIVCVTGLIVSSLLRHKDLPTDHWLPFDYRKPFLHQYIYLHLTAGLYL  
NSLTNCAVDSCFYLSLLHITAQCDVLADTLKNIHDLDKLNNAKNAPERENKDQVMNKILVE  
CMKHFNLIKFTNQITDCFKEILTQFVPTVAMICMGMYKISTLQASSSQFWFFVCTDLGA  
TTQIFIYCFVGNLVTTTSEKLFYATFKSQWYNASQKFKKNLLTFMMAVQHPPIIFYGWDVFA  
INYETFKSIMRTSWSICVALKSTQDLZ

>TcasOr50

MVVEKINLLEPFENVTRLLKILGCWYSPNETAVYKIYKNFIIATCFIYTVTCNIYVFQKMFT  
DSDKAYETLEIAVGSAGVVLKGIIFRTKFQKITESWQQIQPEFQPRNEKQKSVLRRYIEVT  
KTFFKVYFSLVYVGCVTGIVVSSWLRHKDLPTDHWLPFDFFRPPFLYPYVYVHVTVGLYLN  
SFTNCVLDSCFYLSLLHITAQCDVLADTLKNIHDLDKLNKGNVPERENVDEVMNKILTEC  
MKHFKLIQKFTNVITDSFKEILTQFVPTIAMICISMYKISTLHPSNTQFWFFIFTDIGATTQIF  
IYCFVGNLVTTTSEKLFYAAFESQWYNASQKFKKNVITVMMAVQQPIIFYGWNVFAINYE  
TFKSIMRTSWSICVALKSTQDLZ

>TcasOr55

MKAFFSNIKLFQIFGQWCYENESFYKIYKYTATVLLFLDWLFTMIFVLVNFQESEVVDSLVI  
SPSMTTSMKYVIFRVNFSQVERMLKIVVEEQYLKIDSRRVGFVVERGTKSSVFIKACFYLV  
MATVVSLITQPLLQEDIDIPLVIWLPFDYHRSGIFELIYVYVSYSYLYFAYVNVATDCFFYIS  
AIQIGVQCEIVGFMLENLNEIAKQEEENVRRFLSCVTTYNNILECVKIISDCYREILIVQFF  
CSFVALCMTMYQLSIVEPFSVFFKMCVFQSAVICEIFLYCFFGDLVLEKSGKLFYASFSG  
WYNGSAKFQKELLIFMNQLQKPIIFHVGNVIPVTCETFKSIMQKSWFFIALKNTQNRZ

>TcasOr54

MNLQKLDPLEGFKPTISMLKIFSVWNSSNMFYKIYKNVTTLSLAITYTCVMICVVVNFNV  
SEINENFYYPALSTAPFKLVIFQKSFKKIQNLLFLLQSQYTKIRSEKQAKMVEDSVVLSKRV  
VKVFAVLVVPVCVGLFGMPLLKDEIKLPLIHWIPFDYHEPVVFGLVYFVISFSGSFTAYINIGT  
DTFFYNCLIQIETQCNILSDTLRNLHEFGRFEAEIHILIECIEQYKTIKFTKILSKTYQGILS  
VQFICSLLSLCLTMYRMSLADPGSEEFRLRYFVFQWGLPEIFLYCYFGHRVLDSTKNLYYS  
TYELQWYNTSAKFKNLLIFMGQIQNPVIYVAGIFSLDLETFFKIMQKAWSFFTALRNIHE  
QZ

>TcasOr57

MSHSNPLEAFKLNFTFLKALTVWHVENPTYRLYKIFVVFSAVTFSSAWICALVNYNVSEIS  
ENFYYPALMSTGPLKYAIFQKNFTNIVNLTHLLETQYAKIRTENQKKIFDESIVIFERKVMKN  
FAILIPTCVAMFIVPYFQDRREMLIVWFPFDYKQPVFDLVYFILAFACISIAYTNVSTDAF  
FYTCLIQIETQCEIVSDTLRNLKIVTNGFRNVAESRKIFIECIEQYNVILRYTKIVSDTYQGI  
LVVQFFCSLVALCLTMYKLSLADPGSQDFIKYFVFKLGVISEIFMYCYFGHRVLEKTEDLYF  
AIYEMHWYDASKQIQNEVFIFMGQLEKPIVFYVANIFSLDLDTFKKIMQKAWSFFTALKN  
MHDIRNNZ

>TcasOr23

MANFNWTKIETNFVVLKVIGLWPEKTFACKLYNIYTHFMVTCLLVIHLLLQTIQLALIID  
EFQLFLTALPLLLQQYHLLIKLFYFMVKFPILRYILHSLNNHQVFQPQNQDQKIQMEDRLSF  
MKKIYFSFYSMAGVAISFLVAFPILDILNGGERQILFVCWFPYDYMTSPFYEFTYFYQSASII  
YAGVIVLQIDTLVTLLMTYLGFCDLLCENLTQVGYNNSKENNTELEFVKCIKHHQELIKL  
KNHCVDSSGLIFVQVATSSIAIGLTLFQMTLNVSTFNVIFLVLYGLSVTFQMFQYCWFGSE

VIHKSDKIAYSAFEMNFVDAPLSVKENLVIFMACTQKPIKMPVLKVTHLSLQTFTKVLRTA  
WSYFALLVQVSKZ

>TcasOr14

MLLKWSSVIEFNLFLLKWIGLWPGEDYQLNMYSFYGFVSIIILCGHTLSTGLTLILDSGDI  
DTFTETMFILNIEFMTAWKALNFALNRKKFMQLLDAIDKTTFQPRNGKQVTLVLRNIDGW  
KVMFKMFGISLGLSFIFTGLLPIFSKTYKDRKLPMEAWYPFDSTKSPFYQLCYVYQMAAV  
AVAVMVILNVDLVAAMNICIGLQCDLLCDNLRNLHTNTSKSMNQKLIIECIKHHQNIISFAE  
KFRQAFNWSIFLQFFVSTTSLGIVMFKITRFSLYVSEYYRFISYACSVLVQVFIYCWFGNEVI  
VKSSKIPYALFESDWTQDSLEMKKNMIVFILRTQKTLKITVCHVFDLSLPTFLTILKTGWSY  
FAFMNRVTSPHZ

>TcasOr15

MLVKWSSVIKINIFLLKWVGLWPGEKYQLNVYSFYAFTVIIIILCGQTLSTGLTLILGSGDV  
DTFTETLFVVNIEFMTAWKALNFALNRKKFIQLLNAIDKPMFQPRNDKQVTLVLRNIDGW  
RVMFKMFAISLALSLIFTGLLPIFTKTYKQRKFPYEAWYPFDSSKFPIYQLCYMYQMASAS  
TLVVVILNVDLVAAMNICIGLQCDLLCDNLRNLHFDTSKSMNQKLIIECIKHHKSIIRFAEK  
FRQAFNWSIFLQFFISSTSLAIVMFKISRTTNYGSEYYRFISFACSVLVQVFIYCWFGNEVIV  
KSEKIPYALFECDWTPEPELVKRSMIIFIIRTQRILKITVSYMFDLSLPTFLSILKTGWSYFAF  
MNQVTEVNTSKZ

>TcasOr11

MEKYDWMQAIKTNILKIVGLWPDESEDYKFDYALHASVWLSTLLVASTFFQGINIIFILD  
DVKALTGTAYVLLTEILAVIKTYFVVKNMKMLKHLMQSLNKNLFQPRSHEQIKLIQPSLK  
FWKLLYNLFHSLVGGATLFWILFPIVDKKEKRLPFLGWYIVDTKVSPYIEIVYGFQFCSCC  
YMSALIINIDTLIAALNVYIGNQIDILCNLRLNLKAGCSIERDLITCIKHHQEILNFVQYANK  
FYRWIILLQFFVSAVSIGITMFQLTIVVPLSSEFYSLFYANSIISQIFMYCWFQNEVQTKSNK  
IPQAIFESGWTDFPLKTKKDLVFLMKTREPIKVSANLFSLSLDTFMRILRTSWSYFALLN  
QVTZ

>TcasOr7

MNKLQKFDWKATIRPNIAFLHYLGIWPEGEEYYKLNFYTLKTILYIIILVISTIVFQVINIFFT  
LDDLTSLTANIYVLLTEILYFIKLCFLVKNMPALKLLMKTLDHKLFPKANQIVIIQPLLNFV  
KLIFLAFVITCSFTVLFWAIFPILDSSEEEKRLPLLAWYPYDTKISPNYELTYLHQVASYYIC  
YSHLNIDTFITALNTYIQCQFDILCDNLKNIKSDTKNVDTKLAKCIKHHLLILMFANTSNEF  
FSWIIFFQFTSSAAITGMTLFQLTIVVKPFTTEFYNFMAYVTAEVVQIFMYCWFQNEVQVKS  
SNIPYAAFGSDWTEFSPNKQKSLFLITRSQKSVKMSAFNVFDLTTDSFILKSAWSYFALLN  
QVNSZ

>TcasOr12

MQKFDWRSMIKMNIVVLRVGLWPSGEEYKPGVYTIYASTVLTFLFLLGHIFQAVNVYFI  
RNNLSAVTGTIYILLIEILLVFKVYYLVKNMTVLKQLLKMLETEMFQPRNSTQINEIQADM  
KFWQMLIRFLWVSVMCNLFWAIYPLVDNAGKEKRFPLAWYPYDAQKSPYYEITYVYQ  
TISVNYMSSIHVSVDALAGALNVYNGNQFDILCDNLRNLHRLTKNGTIDAGRNFYCLKH  
HKHILDFAKKCNLYLNWILFMQFFVSTISIGITMFQLTIVVRPFSNEFYSLFTYISAIIGQIFM  
YCWYGNEVEVKSSKIFYATFESDWIEFSEEVKKELIFFVMRTQKPVKLSALNLFYLNLDSE  
MRILKTSWSYFALLHQISNRNSZ

>TcasOr10

MEDFSWEATLSQNINFLKVCGLWPPGDEAYKFNLGYIYAGFCVLGFLCVHTGTQTFNVYF

ILDDLEAFTSSIFVTFSCVACVFKTYLLKNMKLLKVLFININKEIFQPKNKEQQLLIQPSILF  
WKR FYLVFRILCYNTCFFWCAYPILDKRIKQHKLPFLAWY PFDSSVSPLYEITYFYQAVAIW  
YVIVISFNIDMLIGALNMFVGAQC DILCDNLRNLGKSDINELNPDLIKCIQHHKAILS FVSKL  
NIFFNWIVLLQFFSSAVSVGFTMFELTLVAPFSGQFY SFICYGSAITTEMFIYC WFGNEIEIKS  
SKIPYAAFECNWVGTPLGVQKSLIIFTIRTQRPMQVSALNLFYLSLDTFKTVLRTSWSYFTV  
LNQVHSZ

>TcasOr17

MDDFNWISTVKTNLLLLHIGGIWPRGDGTHKLNLYTIYAIFITFTTTYHCFSQIINFFVDD  
LQALTESIFISLIQSMALVKAFYILKNMRILKNILKNLETNKMLQPRNLKQIKMVQPSLTQW  
RLLSQMFWISAVFAMCLFGAFPIVESTYKEFRLPYLAWY PFDTKSSPFYEIMYLHQFVSSY  
TIAIVDIGADTLIAALNVFVATQCEILCDNIRNINGSVEEMDSKWKECFTHHKEILKVARHC  
QKFFNWIVLMQFCASVICIGLTMFQLTLVVSFSSEFFSSLFYFGAITVQIFMYC WFGNEVEL  
KSSKILYATFEANWVEAPHQVKKNILFAIRCQNPIKMSSLN VFYLTLETFMAIFRTSWSYFA  
VLRQIQNRISEEZ

>TcasOr39

MSNQHEIDLTEFVKNLKNMHFFGYFFPRFGHNKTRKTLYTMYSTLFV GSTFVLTALSQIA  
NMINSFGDMERMTEASFILFTNVVQCFKIYSFLT YGPRVWNLIDGLNRNIFKPINTDQHRIL  
VNDIYMSKKISKIFLLACTLTCMSWAISPFDKRGDVLRLPLSGWYPFNTDKSPAFELVYIY  
QILTTWIGGMGNISMDTFISGIIMAISSQLSILNNALKNITKNNELVRCVFHYRIIIFSDVIY  
LFNTCLTTQFIVGVIIVCISMFQMSLVPVLSFQFVAMLLYQMCILLEIFLWCFY GNEVMLKS  
DQLTQAAYMSDWTKSPNHFKQNLLFFMTRTQFPLKLYASGYFTLSLET FKAIVKSSWSYF  
AVLNQVHSRQTQZ

>TcasOr41

MDNTLDIDLTEFVRFNVNSIHFFGYFLPEFGKHPKKKIIYVIYAVIFVGTTFGLSLVSEIANMI  
NAFGDIEKMTDASFLLLTNLVQCFKMY SFLTHGPRVWKLHSMNNSDFKPKNLEQRNILV  
EEIKMSKRISKTFMACTIVCSLWGISPFDIRGNSEKLR LPLSGWYPYSTDTSPGYEITYAHQ  
TLTTWIDGLADVGMDFLSGVIMVIAAQLSLLNNSLKNLTKNCKNDGKKANTNLI ECVIH  
YRTIISFADEVTYLFTSCITAQFIIGV IIVCVSLFQMTLVSLRSFQFFSMFLYQGCVLMEIFLW  
CYYGNEIILKSDDELTRSAYMCEWIEESREFKKNLIFMTRTQFPLKLYASRYFTLSLETFTAV  
VKSSWSYFAVLNQVHTKZ

>TcasOr65

MTATKSLKEIPPIYLRVHLTVLQILGIDILPVESVPQNLFYTYTALIISTMCLFTIAEFLDMVL  
NYEDIYRLTFGLCYCVTHVLGTVKMFLMLYLRKKLWGNLTTLEEGIFKPNPTRGGPEELQI  
VNDAITMCNRQGYVFYTLVFLIIGARLLYASLANWPYDKHNYFDGNVTVIVNTKEMPYTT  
WMPFDYNDSPLYETIFAFQIFSTTVYGFYIGAADAVICGFMMLIKAQFLIVKRELETLIERA  
QKAAIAENPDNEDNFGREIERIELDKRTQDYVAKYANECVYHHQELIALCDHAEEDFCY  
LMLLQFISSLLIVCFQLFQVSTLSPDSVEFFSMVCYLLMLFQLLCYCWHGNEVQIVSGEL  
SRYAFGINWIIMRESPKKTLLLLMMRAQRPCYFTAGKFSLLSLQTFMTIVRGAGSYFMFLR  
QMNIZ

>TcasOr198

MPNVTNKRQKRLFSKTRTKSEDPFVMIKDVFDGGYHPVTKMLNYICLVIHSCSLLLLLN  
YFVHNYHFDLMMKYCCAMSLMGYIIATMLFAIFQEHS AIDLTKDILSLFWPIDYCGPRVKE  
EIVKKATKINRIHYIVLLFAGALGITMFPWGDQKEWFLCVQVYQHYFGKWSKIPYYVYFF  
TYPMLAFSSVRLPFMTMYAIVQIRMQVYLLHQHISEISGEYVYDMKNLQILCDQNYQNEI

YDKMRLIISHHIMLKRWMRKLVHTVQISMPVFLVLLGTMTSISVLFYAIYSFHNINFILKVRL  
ISVSVCTVLVVYMFSEAGQALSTETTGVFDLLMTCPWYVWNIKNRRILLIFMANSLEPMT  
FSLAGVTLDYRFALGMLRTSCSYSLILYKLKTGIZ

>TcasOr229

MSARPLHLRNFPYYFLKVLVFDFEQYSAGKVLVSYFCAIVHSISIFLQMHYLVKNFTKETMF  
QYGCVLTVLTYCVVALFFAIASGNFVEKLESEISSFWPLDICGEDVKAAILKRAFYTSLVA  
YITIIAFPIFSVIMFPVLGDQSDMFLCVRVFNEYFTKWSQIPISLYFYSPVIAFSGIRLPGMLL  
YAILITHIQMFLNRRIEQISELSNQRRVFETLCSIELQAKLKRLIRNVFQLVYIAMPIFILLG  
AVSSVFLFFVNSLETASYFLVLRMGCFGANVLVVFIFSQSGQSFSDETGRIFDTLVMCS  
WYNWDKRNKKVLLMFLANSLEPMSITAGITLDYKFALAMLRTSCSYALVLYQMKNZ

>TcasOr160

MSGKTKRITTKTIHLSNPYSSFKKVFSDFAYSKIMIFYTIATLAFHMLSLFLQIYYVATNYSV  
ELICRYGPMMLCLAIYVVTAKVVGVFYKFTMLENQCLFVLWKTCSNSPTTQRLILNKSL  
KMNQKLHLALMSYFLLAIVMLPTWGDNLNLFIFSQVYERYFKFWAPVLYYFYISTFLWCS  
YYSFHLPGCILYLTLLLDVQIKLINDKITEIDQNFSQNEISETLRLCISHHIALKRWMSTLAK  
MVNSVMPVFLVLLGALSTVAVSFFVLNLTQNTT MILKIRLAITVCNLFVIVSTFAELGQIFSD  
QNNSLFEHLIDCPWYLWNVKNRKILLMFMANCMKPKTFSWGGITLDYSFAISILKTSFSYA  
LILFKLRGETIRNZ

>TcasOr165

MSDNTKKATTKSLDLTNPYSSLKKVFINFAYSKIMIVYTSATLIFHILSLMLEIYYLATNFSV  
ELICRYGCMMLCLITYMVTAKFFGMLFSNQKFLEEQLLDFWKAFNSGPTTQRLILKESK  
MNRKIHLALTFYVILAIIMLPWEDVNDFFMFSQVYENYFANWAPVLYYFYISTFVWCSYY  
SFHFAGVIMYLTLLLDLQFRLINDKITEIDQNSTQNEICGTLRLCISHHIALKRWMNKLANS  
VDTAMPV FILLGALSTIAVSFFVLNLTQSTSVILKIRLATITVCNLIVVATFAELGQIFSDQNN  
SLEHLMDSPWYLWDVENRKTLLMFMANCMKPKTFSWGGITLDYSFALSIFKTSFSYALV  
LYQLRGNTFZ

>TcasOr173

MSNVTDFDEPFMFFKKVFFDFGYCTSIIRFYHLFCFTFHICCCIIENYFFLTEYLSADVFTRYGC  
PMIVIGYTIVCEFFLMKWEPIKELLDERETIFWEIDSNSKPQILKYSSKVNRIYKFFLFWV  
ILAIPLLFWGDLDETFIIRIQKIYFGKWSTLFYTYLTVSTLPMVYSGIRFPIVTLYLIMQSH  
LQILILSQKIGQISQNNNHMDDVSKFHDVGYQKKIRTSLHVCMRHVTLKQWISKILQIVQ  
KAIPVYFSLAIIVLVTVMFILYNVESASTTIFKIRLVLVGICGAVVLFTFSETGQLSDDTS  
QVFDTLAASPWHEWDPKNRKTLLMFLNLSLKPVKIYWGGFALDYQLGGSVIKTTFSYAL  
VLFNLRKDZ

>TcasOr175

MRNFQDSDDPFIFIRKVFVGFVGCSTIIMYYSRILIFHTLSLLESYHVITNFSLDIITQYGSA  
MSLMLYSITSQFLICEQNLITEVVEECKSFFWTMDFLSFIKQTQILKDMTKIKRKMYSWI  
WFVVFGIALLPVWGDYNEMFLFPFIYQTYFGNWSPLFYFHFASSFPFLAYIAIRIPAFILYLT  
LALHFQTLNQNKILQIPQNKSGNQEDIFRNLCSCISHHVALKKFVTKTQOSIQKMIPVYFV  
LAILCLVAVMYSCLNSLAMSTSNHFKVIRGFFGGVCGVVVLYTFAEAGQLQADTTGEVNT  
LMQCSWYNWNNRNQKILLLFMVNSLKPYSIDWGGVIVGYSGSSVIKTCYSYALVLYKL  
KISKEQNVTFZ

>TcasOr199

MSMTRSKYFQDSDDPFIFIRKIFIDYGYSKKINYYNRVTFNTCSILLESYMITNFSLDLF



VRYGGALSLMLYHVVTQFLVIAKQKSLEQLLEESKSYFWKADIFNSSVKNQILKSCNHMQ  
RKFCLLWTPFVACGIVLLPVWGDFTESHIFPQVYKAYFGHWSPIFYFCISSYPFAVYTSIRL  
PAIALYLFLQAHFQIVLLNQKILQISKNNLDDETTIFENMEYQKTIYRNLRSQISQHVALQK  
YITRILVSIQKAIPVYFCLAVLCLIAVIFVLLNLSMSASNHFKARIFVSGVCGSLILYTFTEA  
GQLLADTTGDIFNTLMQCPWYYWNIKNRTVFMIFMLHSLNPLKIDWGGFTLGYSFGGAVI  
RTCCSYAVGLYNLRESKYZ

>TcasOr223

MTDFKDPFIMLRRIFIDVNSYKITKLCDFTVITFHSVLVCLQLYYMIRHFDVNLSEIKYGPITA  
FFLFMTVSAVLSGALSQDIFRAVAFFEKISWSLDVIRKEARIKLERKCQVINTCISCILLSST  
TMVINLPCFENQRYFFISNQVFEEYFGKWSVLLNVFYYSVGPYLYGHSVKPCFVYVAILE  
IQLQFSLIEEYLLQTYETDYLESGEHLEDTQYQREIGEALRRCITHHVQLKKLIDMMVDIV  
LMYMPFFLVLGVFLITCFAFIINFADTTTNTVKVQAFMFVVTALCNTVLCWNGQQLIDV  
TNSIFLTLGGAPWYHWNVENIKILLMFIITNCTKNDSIVLAGICLDYKMFVSVFRISVSYALV  
LFNLRKRSLVZ

>TcasOr209

MMPEFSDPFIMLRKMIFIKNHKIAKFCDFLIAYSSAFCLQIYYLCKNFISISLLIQYSPTLLC  
YIFVIDAAVLFFYVEKNILEAITYYDEIGWSLSMIPKDAQTKLRKKCLINICVSFILLLILSTL  
TINLPYFGSQRELFCIQIYEEYFGNWAFFVPHHFYFGVFPFIYNSVKMWISFVYITILEAQL  
QFILVEEYLLSNIINDFKGWKHLHDIRYQQEIGKSLRLCITQHIALKKLVKMIVNITMAAM  
PSFLVLGVLLLISSFAFILNFADTMTNILKIRVLMFVACIVCITLLCWTGQQVIETTSDFLDS  
LVGAPWYLNRENQIFLMFLVNCTKNESVLVLAGICLDYRLFVSMRISVSYALVLFNLRK  
SSITZ

>TcasOr214

MAEFIDPFLMLRALVSVKFNDYTSCLKCNILLITIYSLIHCLLIHYMFKNLDINLAVRYVPMI  
MFLTLVIVGAIFSVAIEKDILEAQVFLFKANWSLEMIRKDAQLKLERKCRINICILCVLLIF  
ATITINAPLFGSQRELFCIQVFEEYFGKWSFIPYYFYFAAFPFLYDFLKLWMSFVYAVLEV  
QLQLTLVEEYLFETYQINSSKEWKNLQDTHYQQQIKKSLRLCITHHIALKFKVMTVDLTI  
KVMFPYLTIGVLILISFFSFIINFADSMSNILKIRIFMFSASIVSITVLLSWIGQQQVLDVTS  
SLVGAPWYFWNLNVKTLIFLMNCTKNESIVLAGICIDYSLGISILRLSVSYALGLFNLRK  
SSLDZ

>TcasOr238

MMSEFNDPFIVWRMIFMINFKKHKITKFCEIVLIVIFSLIHCLLLYYMFTNFSVNLIRYGP  
TLFGIFIAVTIFSVALEKELSGGIDILDEICWPFNMIGKEAQLKLERKCRMRNMCTAFVVLII  
LTTIIVSYPCFGDQRDFDICVFEYFGEWWSIPYYFYFITIPFCYNYHKLCTFTVYAVLET  
ELQFFLIEEYLLFTKMGYLRWKYLENTQYQQELGKSLRFTIAHNAKMKVKAIVNV  
TVNGMPLFLLGFLLYISCFTFVINLADSMTNILKIRIFVCGASCVSVTVLLCWNGQQIIDV  
TNSIFSTLTGAPWYFWDVDNVKILLIFITNCTKNDSITMAGICLDYKLFASLLRISFSYALV  
FNLRKSSLSZ

>TcasOr259

MMPEFNDPFLVWRMIFTINFKKFKITKFCEIVLIVIALVHCLLLYYTFTNFSANLLIRYGPV  
MIFYIFMIAATTFISIALEAELSEVITFLDEICWPLNMAEDAQVKLQRKCRINMCIAFLVLII  
LSAIVNYPFFGDQRDFDICVRFEEYFGEWWSFIPYYFYFAASPFFYYNYFKLCTFTVYAVLE  
AGLQFFLIEGYLLQTYKVDYLRWKCLKDNRYQQELGKSLRLCIVHHIALKKLVKMIVNL  
TVNGMPIFLLGSLLYISCFTFTINLVNSLTNILKTRIILMGASCVGVTVLLCWNGQQIIDVT

SSI FTTLVGAPWYFWNLDNIKILLMFITNCTKN DKIVLAGICLDYKLFASILRISFSYALVLF  
NLRKASVSZ

>TcasOr202

MVEFKDPVIMLKTIFLVNVKEMTKFSQVFLAIFTFYSLVHCVQMYLYKNFDVNLLIKYAP  
ATTATL FVSNTKLLSSSLNIMPIFSVVSETKLLRITTFIDKTFWPLDSIRKEARIKLERKCRAI  
NISIYCILLLSVAVFSNFPFCGRQDDFFLCIKIFKEYFGQWSSIPNYIYFTLFPFCYPYFRIAF  
SFVYAILETQLQFSLIEEYLFVYQMVDLNWKYLQDPRYQQEIGKSLQLCIEHHTALKKLI  
HSIVNITLTGMPIFLLFGIGLVSCFVFIINFGDTMTMILKLTPLLLYVATMLSMTLLMCWN  
GQQVIDVTSRIFYTLVRAPFYFWNLYNMKVLLMFITNCTR NENIVLAGICLDYTLSVSILRI  
SVFYTLG LLELRNHSFDZ

>TcasOr224FIX

MTEAGDPFIMLRWILLMDVSNNKITKYCNVFLTTIYSVVLCLQIYYIFKNYDTNLLIKYGPI  
TISLLFMITVAVISLIMQKEIFKT VTFIRETCWPLNIIQKSGQIKAERKCR TINFYITSTFLLFLS  
AIIHYPCFGSQRDFIICIEMFEEYFGWSSVLYLYLIGVHFLYR LRFQTCYMFVYGMLEA  
HLQFFFLGEY LLETYQTDCLKRCKYLQDTRYQQEIGQSLRFCIKHHIALK KLVKMALNLA  
FIGMPFFLVFGVLLLISCFTFIINFADTMSTILKIRIFMFASNTV CIAILLCWIGQQLIDVTS DIF  
VTLCGAPWYNWNLDNIKLLLMFIMNCTKNESIVLAGIRADYQLFV SLLRISASYALVLLKL  
RKCSLVZ

>TcasOr217

MVEFKDPFIVLRKIFFIKFNCKLTFLNISIIVFFSLVLC LQICYLMKNFNLNLLFRYGPVTV  
LFTLVTVTAVLSLTLEREIFMAITFFFKFCWSLNIIRNDAQITLKRKRCV NIGLLCILLILIAI  
VIGFPCFGS QKDFFICLEVFEEYFGWSSFIPYFYFAASPFLCYHFLRICFTFVYAILEAQLQ  
YLIIAEYLF EIQTNPSKRWKYLQDTRYQQQIGKSLR LSIVHHVVLK KFLKRTLHLTKIGMP  
FFLVLGILLTSSFAFIMNLGDTMSNILKIRIFLFTTSVLCITILLCWIGQQLIDVTSQIFVSLSG  
APWYFWNLENIKILLMFLT NCTKNESIILAGICLDYKLFVSVARLTVSYAVVLFK LHKSSLV  
Z

>TcasOr254FIX

MDKLDDPFIVLQRLIFIEAKNcklaRFFDVLLIVLDSL AHCLQIYYMCQNFAFSL LIRYGPVFI  
FFLLVIVTAVISV GLEKEIIEYAVYCKTCWPLNIVKKQTQIKLKKKCQIINRGILCSLVFLA  
AVISLFTCFGSQREFSICVEVFDEYFGWSSF IQHFYFTVAPLLYHFFRVCYLFVYALLQA  
HLQYFLIEEYLF EYQTNDLKGWRHLKDTRYQQKIGKSL LCCITHHIALK KFKV KMTLDLV  
LIGMPFFLV LGVLLLISSFAFIINFADTMSTILKIRILFFAASSVCLTMTFCWIGQQLINATSEIF  
WSLGGAPFYFWNRENSKILLMFLMNCTNND SVVLAGICLN YRLFLSVVRLTVSYALVLFN  
LHKSGLVZ

>TcasOr222

MDKRDDPFILRKMIFIEAKNCKIAKFCDAFLILFYSLVQLLDIYYMSKNF SISLLIRYSPITI  
MYLLIIIAAVISVGLDKEIIEAYTVCKIRWPMNVVKKQTQIKLKKKCQIINAGLSCTVPLFL  
VTIISTFPYFGSERDLFICVEVFEAYFGWSSFIPYFCFAASPFFYHFFRITFVLVYAFLHAQ  
LQYLLIEEYLF EYETDEAKGWKYLQDTRYQQEIGKSLQLCISQHIALKQFVKKTVDLVLI  
GMPFFLVFGVLLLTSLLAFITNFEDITSNILKIRILLAAGCSLCITIVFCWIGQQLINVTSDIFFS  
LGGASWYFWNRDNMKTLLMFLINCTENESVVFAGICLN YELFLSVVRLTVSYTLVLYNLQ  
KQZ

>TcasOr208

MEKLDDPFITLRKMVFIEAKNCKIARFCDVLLIVLYSLAQCLHLYYMCQNFNLNLLIRYGP

ILISCLLVIVTAVISVGLDKEIFEVYTVCWKISWPLNFLRKDAQTKLRRKCQIINRGILCSAL  
LFLTTVISTFPCFGSVRDFVICVEVYEKYFGIEWSFIPYYFYFAAAPFLYHFFRVCYVFAYAF  
LHAQLQYFLIEEYLLETYQTNDLKGWKYLQDTRYQQEIGKSLLLCITHHIALKKYVKISQN  
LVLIGMPFFLVLGVLLINSFGFITNFGDTMSNILKIRILFVACGVSITIVMCWIGQQLIDVTS  
EIFVTLGGAPWYFWNRDNNNILLMFLTNTCKNESFILAGICVNYQLFFSIVRLTVSYTLVLY  
NLRESGFIZ

>TcasOr206FIX

MWNNNPFIVIRTIFLDINNYKIVKFCYVSLTVFYSLVHCLQFYIKNFNLNLIIRYGFITSLL  
SYVLAAGILSLVVEKRIRKTQIFFDEIGWSLNIVGKDAEMKLEKKCKLINISYAIMLLLIITL  
LVNLPFVGSQRDLFLSIQVFEEYFGKWSEILDRLYFALAPFLSYHGARLSFTCIYAIMQVQV  
QFSLIGEYLFETYQVDDSKSWKYLQDTRYQHDIGESLRLCVEHHVALKKSIIKMMVDIALT  
CLPFLVLLGLCTLISCLAFIMNFWDTMDNILKLRFMWAAWIVLITIMFCRSGQQLIDATSDI  
FFTLLGGAPWYYWNLDNIKILLTFMANSTKNDSISLAGICLDYPLFVSVANTTVSYALVLYN  
LRESSLDSSNKKZ

>TcasOr263

MWNNNPFIVIRTIFLDINNYKIVKFCYVSLTVFYSLVHCLQFYIKNFNLNLIIRYGFITSLL  
SYVLAAGILSLVVEKRIRKTQIFFDEIGWSLNIVGKDAEMKLEKKCKLINISYAIMLFLVIT  
LLVNLPFVGSQRDLFLSIQVFEEYFGKWSEILDRLYFTLAPFLSYHGARLSFTCIYAILQVQV  
QFSLIGEYLFETYQVDDSKSWKYLQDTRYQHDIGESLRLCVEHHVALKKSIIKMMVDVALT  
CLPFLVLLGLSTLISCLAFIMNFWDTMDNILKLRFMWAAWIVLITIMFCRSGQQLIDATSDI  
FFTLLGGAPWYYWNLDNIKILLTFMANSTKNDSISLAGICLDYPLFVSVANTTVSYALVLYN  
LRESSLDSSNKKZ

>TcasOr200FIX

MSIQNTKKTLNGKEKHPDFIKFCFTDSNDSFLILKRVYIDFCYHKITKTCNLLVISQLFFYL  
IQIHFLLSRFSLELLARYSTIMMITTVALFGLILSFYLEEDIHELKILTEIAWPLDKASKKDQ  
QDLRQKSRRLNSLNLYFLGFLAFMIVIFLPIFGDEENLFLCIQVFDEYFGDRAFIYNLYFIGF  
PFLIYFSVQLCFMFLYAILHLHVQINLINHHICEMGASFELLSDWKKLHSVYQSAISQLLC  
QCIRQDIALKRFIVKLNETVQLGLPFFLPVSGLCGISVIFLLNYMCTMSLVLWLRVSAFFIC  
LVFVALIFSMSGQLLIDETGKIFDTLVKCPWHIWNVRNRKIYLCILTHCVRPNCISYAGITLN  
RIFLITVIFYKTVSNAFILYQVRNSZ

>TcasOr231

MEVTGKKVTSGBPFIITLKKLYIDLGYHKVTKLVNVFFIVFYGFVYLLQIYYLIVHFNFEIIA  
KYSTILLSTYLFNVMIIFSIIYEKCILDAYKTFSQIAWPCDNASKPLQIILQRSKTIKYLNYFF  
LGFIFMACINWPWLGDNDFLLCIQVFKKYFGSWSPLFLLFYYLGFPIIGYSAARIFFIILY  
GVLHLELQIRLITELFCKISRATLEDVRNAKYQRDVYWTLREGIRHDTALKKVLFDLNKE  
VKHGIPVFLIVTLLCSVSIFFFAITYLESMGFGIQIRTIAFVGAVIFVLFYSLLGQHILINQTSL  
LFDQLYECPWYTWNVKNRAIYLNFMNLNTRPIKITYAGICIDSRFFLSITRILSNAFMLYQL  
RNSZ

>TcasOr315

MTLVRKLQAAATNAFEIRIKDDILAEFNPFLVLDKSWSTKFAVFLTVYCVFETLACALV  
YSTLDVNMMGTYAIVIARFATTFCSSFFSFTKRKQYFEIINENFPHFWPLQSLGKSTFNRIK  
MRASSVKFYSLNVVVMLIGAVILISFTQDESEVYLSVKIYKDYVNKWTGTFVMFFYVSFI  
YIGLVVAASIFVLTYTAFHLIFQCFLNQLKQINDSIVENEQKQAKFDEKYQSFIYKELISC  
VKLHQRLLIFGKRINHLVYAPLLVYIFGGIVGVVALIYYLKSSVQHIFTSLILLIALLINSTTF

VINGQMLENEAENIYISLTNLPWYSLNVQNRVVYVMLMQSQKIIHMSASGLVSLNYQLTI  
VFFRCIYTGMTFLVNVGLZ

>TcasOr316

MTLMRKLQTAIRNLFEIQIKDDILAELLDWPTLVLFWSKWPKNFAIFSTIYCVFDTLVCTLVY  
STLDVEMLGKYAIFIAKSTIALCSFFSFFAKRKQYHKIINENFPHFWQLQSMGESTFDQMK  
KIATTVKFYSCLSVVAMLIGAVILILFTEDESEIYLSVKIYKDYVNKWTTGYIMFFYASFLYI  
GIVTAAVVFLTYIVFHLIFQCFLLNQKLLKINSYIVKNGQKLVKLEERNQNFYKELISCVK  
LHQRLIYFSNQINDLLYAPIFMYTFSGIVVGVALIYFLKTSIQYILTSVLSIVSLIITTTFVING  
QLLEDETENIISLTNLPWYSLNVQNRVVYVMLMQSQKIIHMSASGIVSLNYQLTIVLFR  
IYTAMTFLVNMGLZ

>TcasOr272

MTRTPTDDTTFDLDNFMKNDSMKLVRVIAYDTLKFKITKLILFITFLVHFSTTLIQVYFVCV  
DFNVYFFVKYAPAMFGSLFVMVSIALFVTAETDMVVRVFRKAQLRKLTVEDGPSFHFVQ  
KECKIFTVFFVLNLIIFSGYLHALPDDDDREIFYAFAFFEDYCSEWKDFCSFLYRITFLPV  
AYVMYVPINVFVYAAIHLKSQIYYLKEHLIQINEGYDISNNNDLFYDENYQRIIREKMIYLY  
KIHVKLFLAALDIRKLIRGFIALFAIVGCLLGISILYFVMLFQGNLFDKFGRLSTLTVVAFNSF  
AAVIISGQMIESSSSDDVDIIYNCNWYDWNEENKRFFLLIRMATMHPFKLQFSQNYAVNY  
QLGVAILKAMYSAFSLLKAIKNDFZ

>TcasOr302

MDFSEPAPFHADALWIVRLLAVDILNKPFRVFLMFTVLLFHVTVLLIQIYFICFVQTFGEFV  
KYSAIFCAMFYVNLSMITLLYEKNMVKHILEKCKLWALNSIDDKIYQDIRREALFGTVFVI  
TNLILVFVTTITFIAPLDRDVFFVYFFESYLDQTWGKILTLVYRATFLLLGFIIVTCAHQL  
FYTIQQFKFQIYLLKEHVENITNIEFFDEDDSLLLKNPSYQREVKRRVRFCIKRHIQILNGAD  
VGMKLVKKWIPLYSIAGILFFVSIVFSCISFDGSLEDVYLRVGSGLGVVSVTTFCSIIFVGESIA  
TQSDVLAQVNTFIRWCSLNRENQLFAIMGIMSKEPYVVKFSQNLAINYALGIKVVKLVYS  
FLCFLIQCKGVLYZ

>TcasOr300

MIGLTNGDYSPRSMEGDCLKILKFFAVDIFNPKIVRFFLWIMLLYHVFTLVTAIFYMLYVL  
SNSEIIGYTPAFLGNFYPMCLCVWSVLFISRLIYVKEDMPLWAIDTAGAKVQASIKRKIFLYT  
AFGIFNLVLSLSAGSFYLNKNSVSDVNVFLALRIFRDYFPNYYQVLDLIYRLIYFCFSYLMVA  
PSYLLIYYILHVRIQAIIFAAYVAHIDGHSYDGTIDLDNEEFQSEVERRFKFCIKRQIEFLL  
MESKKLSQISNLIAAFSLAGCLFGISIFHLFTGQLIQEYYFRIGLTSLAAIATFSAFIYTGQST  
EVQIELVDNAIDNLCWYNFNRSNKLLYLIAKADLARVRKIKFSGQWAVNYDLGFAIVKGIY  
SIISVVVSMWZ

>TcasOr276

MTMQFIVKRATRGIHDLRVLKFISSDIFDIKIMKLCLFITFLIHLTACAITIHAFMFNNFSRR  
EFISCAPVLFYGLLGLGTILFKPSMTRTLMLELKAWDITAADDAVSSRIKFEINVITVFC  
LVNYLLALVASFFYYMSFYGDEEIFYLIRFLEDHCPNHKRVLIKLYKISFVLLGYVMVSHA  
CQVLYATQHVRVQLILCAHFMANVTKQAKNIKDEHLPDDNNYQNMIRERLKFICIRHQEIR  
RFYFDKLEEMGNLIGGFALLGCFLGISFAMHMLTSEFLRYHFARTVSSIIAGVTTFATVIAA  
GQSVETEVDISTRVVKVWYTFNESNKRSYMLMLLNSMQTYKIKFSENYSINYELGLSI  
VRGVFSIVSVVQLDYZ

>TcasOr281

MDYSEKSLIQGDCLKLLKVISSDIFQPKLVKILLIVFGVHLVVDLLTLRALLVNELDKFEI

FYGPVFFGSFYGMMALLTLVLKDDFISNLKQEFRLWPLDCAGDEIYSQIKFENKIIKIFVVF  
NCIVTFIGSYLYFLPLDSDNETFYAVRFIEENYPDHRNLLHGLYRSTFLIFGYAMTVHVYQV  
IYNSQHLRYQIIIFTEYVASIGNPDKRKENELFYDKGFQKVYERLKFICIMRHQEFLLVSNK  
KVGDMRVFIVGYSLCGCLLGLSLTFYIFSGKFYREHFPRVSVACVGAVTTFFWAVITAGQAIE  
SEYDSSLSTLLGKIEWYYFNDSNKKNYLIMLINLMQPWKIKFSEEYAVNYELGLAIVRAIY  
SIVSVIASMHFEAZ

>TcasOr283

MLKFEPKPTTKDELLWVVRTIYVDLFRNKLIQFALKMLFYGSIIMAIYQGVLFLYEFIEHYF  
VKYSSMYCFTCFILLAAYSVPPIAEVATTAFTTIKCWKIDSGGALVENKIKQEAHFTNIITAIN  
CIFGLMVLVLFVFPFEDDNDFYFLFIAFEKYFPQWQQLLKWGFKAFFPCITILLQAPFYIVYI  
ACLRIFELYMWMEFLKNLNIVYEKSDICELVHDSEYQTEISKRLRFCIERQEHIYRSLLYG  
KKYVQQLDIYIFAYAILGSLGGISIIFVCISFEGNFFQGTYLRLSALTFTVTLTFMHVIWAGQS  
VETTSSDSYDILKQCDWFLWNLKNRKYLMCLNYTQRPLKAQFTQNVSINYVLGFSVVR  
TVYSTLTALNSLRKASKZ

>TcasOr286

MSVQKVSPDNLWLSAKICLHIFQYKAIKILKILSLSIIILTCIQTFLYLKRFDSEYFMKYLPV  
YAGSLFILASIFCIEHISHVILSTVEEFEFWDYADSKPEIRNWIKEALYINTFMVVDFAVAY  
LSGIFHAIPLEDDEYEIFYPLPIFQEFFPDWNTVLGWLYRSSFLIVPVVMTAPSLMIIYFTSRLR  
FQMFLFMDILENISEGYDISEANDLIENSTYQKEIKERLKTICKRHNEFLSAGGQVMKNGQ  
LFILIMSAAGVILGVSIIFFLFSFEGSFEEKRYPRVTLVISTGLTFTHVIIAGQLVENIATRLYEI  
LHFMDWHSWNQENRKILLIFMHNAQQELQIKFLDEVAVNYQLGISIGKAVYSMISVLSSEFK  
NLEESYNZ

>TcasOr289FIX

MLNFEEKLDENIFKNDVLWLSRKLKYDYNTKIVKILFVLSIRVAITLLQTLFLQRFDG  
RYIIKYAPVYAGSFLIFLSVKHIPLSLMLINSFKTITLWRIDSCGPEIERKIKKHAMWTNICLIS  
CTVVGLVSGIFHAMPLEDDEELFYPLAMFEEFVPQWKNLLSWMYRLSFLTVPFSMPIPVYI  
AIYVTTKSYFQILLFGHFLENLNTGFDTTLNHLIYNKYQNTIKKRLVFCIKRHAYFSRA  
MNELIKKTYVTIATFSIMGVILSISVIAFLFSFQGNFENRYIRVTTLVFTIVTVSTHILYAGQLI  
EDAAFQVYTTLKTVDWNSWNLENRKLYLVCLQNAQIIFSIKFTQDVSINYRLGFSMAKDI  
YSMISVMSKLRNVDYSKIZ

>TcasOr293

MISFEENIDHDIYKDDVLWIMRKISIDYFHYKVVKILLTLLSIGITILTVIQTFLFLERFEGRYF  
VKYAPAYIATFLMVVAMQYISFSIRLAALIKRITFWTINSARVETERKIKKHAMYTNIFFLGT  
VIMGVISALFHIMPLDDDNELFFPLILFEEFVPNWKNFFSWMYRLNFLAVPFTLPIPIYITTY  
HLIKSYQILLYLDFLKNINTGFDTTSSNNIESAEYQQVTRDRLVFCIKRHSYFYTQMREVN  
RKMSKFIAIFALISVLLGGSVLTFLFSFQGTFFENRYPRIVTLILTAGCIFAHVYAGQLIEEAAT  
QVCENLKVLDWYHWNCHNRKLYLIFLQNTQKPYKTQFSQNVSINYELGLSIIKTVYSLISV  
LRNLQDINZ

>TcasOr294

MIVYEEKIDQDVNGNDILWVMRKVCIDCFQYKIVKILLLLLAIFIAITLVQGFRFLERFDG  
PYFIKYAPAFIRTFVILVAIAFISFGMETAIVKDTTFWLIDSAGLESEKRIKKHAMYTNIFFV  
SYIVVGVISAIFHIIPLDDNDVLYPLALFEEYVPDWKNLFSIYRFTFLTVPFTLGIPLYTAI  
YIITVYQILLFVVYVKNINTDLVDENVKYQETIEKRLIFCIQRHSSFLKRMKESNRKMSA  
TVLVFSIVGILLGASVLMFLFSFHMSFKIWYYRIITMVLPTGAIFIHIFIGQSLANAISQLEAN

LKMVEWYHWNIPNRKLYLIFLINTQEKGVKFSQNVSVNYKLGVSIKAVYSLISLMSNL  
RSIDZ

>TcasOr287

MISFEEKHLTNVRESVWLWLGGRIMSLEIVQYKPMRFILNIIAVSIIALTLIQTYLFLQKFDGLY  
LIKYASVYTASLFILFSIIAAPFLTKFSTEALNNLEYWPISAGAQIEKQIQREAIYINTFFVVN  
MVVSLISGVAHMIPLDDDKELFYPLAIFEEFAPKWKWLEWGYRLSFLVVPVVMLNSSYV  
GIYTLNFRFQISLFNHLKNINFLNDNEQTIELMDDQKYQNEINKRLKFCIKRQTHLYKV  
AHYVTGKVKHLSFFVAILTILLIAVIVFLFSFQGTFFENRYFRIITLVLTAGNTFIHVIIMGNRI  
EEETEKIFENLKSLNWSSWNLQNRQVYLIFLHNNEEHFKVPISENASVNYELGISMAKTIC  
SMVSVMSQLKNIDYSKNZ

>TcasOr292

MQPNLQKNDILWLIRKLTDFDLFQLKITKMFLIITSVSIILLTIIQTFLFLKKNFYFIMYSAV  
YTGSLFILVSSLSVLPISKLIKTAWVKFSFWEINSATPKIERKIRKEIFYINCVFFNTIVAIISGI  
FHAIPLODDEELFYPLAIFETYTPPEWKDWFSGIYRASFLPMPIIMVAPAYTVVYLCAHMR  
QFCLLHFLLENINPDNENISDKKYQAQIKERLHFCIKRHHILFSKSRPVLEDLKKFVFLTL  
CGTIFCISIIIFHFSFQGTYEGRYPRIITIIIAASITFFLSILPGQLIENTSSEIFEVLNNTNWSW  
NEQNKKLFIILLNTRQIYKIKITENVSLNYELGVTMAKAMYSMISVMKQLZ

>TcasOr304

MRCYNHDVWLWLLRFWCCDIFQYKLLKFVIFVMLVANTVLMVLQGYHFLINFNLSLYFISYS  
PYWFGSFFIILSLTCLTISNIGPEGIKSATLWQIKSTDPKLNRIKQVKLITAYIIVNTVIALIA  
GLAHTFPSKNAEEICYVYKIIIEIVPKWKTELCWMYKASYIVMALALPATCNQVVYGATH  
IRFQFYLVLDWIRNNIIESGCDDLKLPNDKDFQHKITKNIIIVKRYTEFHRTFQAVNQRIAI  
YILLYAVIGLLGISILMFYFKFSDTLVISDYLAGHTLTVAAITTFMATVTSGQKLEDIFEELL  
YTWCSPWPYLFNKWKNQIYLMIMVNIKPINFRFTENSSVNYNLGAAIAKTIYSMLSLLTQ  
MSDKDVSTLZ

>TcasOr153

MAPNKSSKKDFLDMCRKYMHGSGLGPTSPKIKRFISLWLLFPVSLLLDVLVIYDFHFLDN  
DIFKTAELLESVSSFGQLPIRKFIPTYHSLIKLQNLLEDKRFKFSYEMFGETYKFLRRKMVL  
ATRLIQTMIFFGASVATLMFVSTLADDRKTVPLECWIPFKHSTHVVLVMQFCSLCEIYLV  
GAVDCLYVLTCDIKIQFLLLQKCLKTIQVGVKPMEECLNELTICVKHNNLLRSHKSLNR  
IFSEYFFVQYFVSVLAACVQLYILMYITASLEDIMKSIVYLSAVVFQVAIFFMPASDIEEEAE  
QFAVEIYNVNWECTSGTKFRKQLLFMLMKAQKPLYMLGGGMIHANRNEYIVLFRLAFSIS  
TLLGGMNENGRTDKZ

>TcasOr133

MEYLKYCQTYIKGTGLASNSSLFRNILAKYFFLPCCFLIIAFSHELWDTNNNDVSLVTEVL  
ECVASYTQLIRKYIVFTQSDLMVEIINDCGKLWPFDMFGSELGKKFKQQMKTCTWTLVKF  
LVVCGFATFFLMCISARAAERDNSLPFLCWVPDFPYATELLFFLQFMLLLELLYVVLATDAF  
YILICMDIQFEMMGKMLKSIKFGSEKECWKDLVELAKQHDRMLHQKLNQVYSKY  
VVQYFMTVGSMTVQAYNLKYRMVNIQTALKSIVYTFSLMFQCGYYFFPASNIEIEAENFS  
TEIYFLNWQNIGNIKIRKHILFMLMKSQENLAMMGEGMVHVNRNECLMMFRLAFTIATL  
LDGLNQVZ

>TcasOr136

MEYLKYCQSYIIGSGLASNSPVFRQFLARYLFFPLSLILVSLSIYIHKDANNDIYFLTEVMESL  
ASYTQLLRKYMIFTQSKLMVEIINDCENLWSLELFGPELGKKFKQQMKNCWTFVNVLVT

SGFSTVLLICITTLTDKEKSLPFVCWIPGPHATELIFLTQFVLLMNGLYYIKLTDAFYLLVC  
MDIQIQFKMMGKMLKTIHFGLLSEKESWEKLVELAKHHNKILHKKLNKVYSKYVYVQY  
VMSVTAMTAQAYTLKYIEVNIQLALKSIMYTCSLLLQGALYFFPASNIEIEAENFSTEIYFLN  
WQDHGDVKIRKHILFMLLKSQENLEMMGEGMMHINRNEYLMMFRLSFTIATLLGGLNQ  
LZ

>TcasOr138

MGASIHYFNYFYGHSQSSKFPTSSKSLKARIFNYVLYPISCTILAFMLYNFRYMNDNIFKIA  
RNCQSITSFGQIFTRHFIYAQHSFLENLLKNTAKNWKYDPKNPLFGHKTWTRVILVKSLLKI  
MSFFVVTFIILPFFCQDIDLPAQWVPGSGHKMQLLIYFLQSVCLLEPMILLDMVDSVFL  
TGVELEIQFILLRKAIKNVQISEQENQNFCMGKLYASYHQFLLDQHTVLKQAFSSFFFL  
QYLVSVQGLCVEIFVIKQASTIEQIFFSATYIVANAMFLSFAFLAASYLEIEAEALPHAIYSID  
WYNGDEKLGKHVLFMLMRAQKPLILTGAGMFAVTRNALLQVYRLAFSISTLLKQVZ

>TcasOr139

MSDHFVRYVSTIFKLSGYLPSLKTLLKTKILKYVFSPIMFTLITFIIYNFRYMHHDI FEIARTCEA  
LSTHGHVFRKLA VLKXANLIEQVINDRNFFWSYEKFGKLGQRFRQKLFFRDYVMKSLS  
AMSVLMLAYFYLTVPVFRSVNLPQASWVPQFSHATALVYFCQVVCLSEIPVAVIIDGTFL  
MGAELEIQFNLLKKTLLKAVEIGQNSGQKHEEKCLKQLKICASYHDFLLKEHVKMKTI FSEF  
FLLQYLLSIEGLCIELFVVNKAQTWGWQFALGAIYVVGII MQSSFTFLSASNLEIEAESLADSI  
YDWDWYNAKDPRIRKHILFMLMKAQEPLRLTGAGLFDVNRNMLLQIMRTGFSISTIMRQF  
Z

>TcasOr144

MAFNESQDNFKLCFIAFNLSGLGPSSKPFLKILSYVLYPWLCLLFVLVCVNIVFKHSNIWDI  
GEVTSSISIAVMMVVRKTILIKYSSVFAEIIELHSRFDYGLFGKATETKIRKKVDFFKILK  
CYIVSGITATSTRSIVPIFDKNLTMPQDCWIPGNNSIVKHIIYAFQVIFYAESISYFTFFDGLLI  
VTANLQAQFILLQKATGSINFETDSEETA WKKLVKCCCEHHKFLISVHKKLNTLYSYFYLV  
YFLVITMGCVSLFVIFDKSSTFAQLLES AITMVVLNVMIAMICISSEIEIEAEKLLTQIYEVN  
WYETPNLKIRKFI LFWLMQAQVSVETK GAGLLVNRSLMLQVQRFSYSVSTLLKGMNEZ

>TcasOr146

MKYIREVENIKAGIFSSCGIVAEQ RVEMSEKNQQDYFKIPDKCYNWSGVRVSSNALT K FV  
SLYILYPLMLILYFMIIYNIRFKKNISDITEVFISISTFTIITFRKTL LIRNGSIYEDILKKQSHY  
KY YMF GKPT EMKLRKSMFCVMVIKFLIASTTGSII FHSIISPIIEGKIVLPQPCWVPNDPV  
ANDIIFALENIFYMEGTNYLVVFDGLYLLMTANLKTQMILLRKAVASINFREDEKTTWAKL  
KEYCEYHKFLLRIHGKINKIYS AFFLMTYVFTIMGTCTPLFVIFYEEADMVLLGKSVFIALI  
LNTLLVMTFIPAGELEIEAEKLSFEIYSINWYETKNL KIRK FVLFWIMQTQIPVQMSGGML  
IVNRPLVLQVQRIAYSLSFLAGLSZ

>TcasOr154

MSNND ETDYFKIPLKFYNW SGVRITSK KIPKIISVYILYPM MIVLYGLMIINIRFNIDSLAKFI  
EVGISVSTMTI ALRKTLLIKNGSVYEDLLETQKLYWAYNRFGQAFESTQRKRMYFCLLV  
KFIIGYSCVSLSYHSIIAPIIMHEMILPQPCWNP GNTTIGRNIIFVENIFYIEGTSNFVIFDCLY  
FLLATNLRIQFALLRKELNSIDFKEDSEEKCFARLVKCSQYHKLLLSVHRKINTIYS AFFLLT  
YVFTITSTCTLMFVVFYMEADAALLGKSIFIVILNTLLVMTFIPAGELEIEGEKLAMDIYFM  
NWYETSSLKIRKFI LFWLMRAQIPLQMTGGGMLV VNRPLVLQAERVSYS LASFLANLZ

>TcasOr113

MLDAWERLTFFYPFKWISLGG LHPQNDRLVAKFLFLYNFAGFGTILGLAITQIYLSYENIYYT

IDSILTIVLYLHIASKYVNLHLHKDTLAMLQERSKFWPIDTFEMTVRQKCVRILTKSLTIKS  
YLGYSLLVVISFLIQPIITGQLPVFMYVPRGTYYIFFVIFMTITPGIMSSIWGVDTLFFSITTPV  
SIQFKLLAHKFETIDLKMDSKRVRHEFRKLVYHNFLINYCQNINRMSSGIFLTQYLVAIAT  
SCMQLFITSQPEFGLLNKIKCLTYFIMQIETGIYCFTAQLISESSENVGNNAVYKAPWYDFNC  
GTRRDIALVIVRSQKKVVFNGLGLVWIKMETFTKIFKTALSFYTYLNTMVYQNZ

>TcasOr115

MSNKQLDPTYIYLKIFKAAGVHPDVKVTPFLVFFFWMNCTIVSAVIVLATIGAIFGALDNDI  
NTVVECLQSTFIYIHILGKHFVLFYSKPILSHLLAQRTHFLQLETFDLSTIEQFQQLLKTSK  
FVNTFMFCTSCVVFVSYMQPYLTHGDLPSVYVDPGWYYYIHFGFWPLAPCIVASIYGS  
ALFCAISVPVIVQFRLARKIQNWKIENTKLNQKSRKIFKKNLDELVDHQNFLFEYCNEM  
NKFNNGIFLNQFLLSVGIIQVQFVVSQKGFKLPNKIKCVGYSFMEIIEAIFCFNAELISDA  
SEVDGNAAYDSLWYESDDPEVRHAITLIARSQNRIVFSGFGFVWINLKTFTQIFKTALSFY  
SYLHNVVLNZ

>TcasOr116

MPETLSFYPELMLKSAGLHPYTKLKIVKFFYHHYLNLFFFIFLLFLAILEVGVSVKCDIYRA  
IEALSSVLFMTLTLFRYVVNYRNKPSLAWLLEKRSNFWLLEHFEGQIRTDCAKIMHTSSNFI  
RNYKNYAIVLAAVFYVQPFIFHELQMKIYVPEGWFYLYLVYWYMTPLFVSVYGVVSM  
FCAICIPVTIQFKLLAHRIQNLDKSEKFQRDLDKHLVDYHNFLIDYCTRINRYSNGVLLFEFF  
ITISVCCILFIAANDYPFVDKIKYAGFIVSQFLDTAIFCYNCELISDASENVGKAAAYDSLWYE  
SESKIRRSLLIIVRAQKQVTFSGYGLVRINMMTFTQVFKATLSFTSYLNTVTVDEKMLNNZ

>TcasOr126FIX

MYNNKDSLLYDPLRFFGFIFHPIFNSLILKISFYSTTTLGLFIYTMAIIGIVKPEETNSFFTLE  
CLQTCILLSHTIGKQVNYMNSNKIVKFLQMTTEFEWFEFQGTIHPESNLFHTVRKMIR  
YYFLVTTFGFIFLINPPVCYVPEGWELFLRIVRALTFWSYYTSTMATDAFFVACGTLILLIQF  
KLLGHKFKNLDTQSQEKWNNLRQNVKHQIFLHSCLLNQIFAVVFLIQFLNSIAALAISIFIF  
SKPGSWNNRFTLFLYLVVLFENAFYCVPAELVSAEALKICDQLFASKWYESNVAQFRKS  
LVIVLCCCTQKVIKFSFGLVEMNLQTFVLISKTALSFYAFLNQLKRZ

>TcasOr127

MSPRTLEMIADLPKDIITDSLKMLRLGRHHPTGSIWWTIFFIPVNTFFCSLLIILSIVGIVRYH  
EDDVFLAVDCLGTCTLMLHAISKQIFLHAQKNAINVLLKMKSQFWNLDDDFDGEISKECEM  
ILTSKIAVRIYFSFTCAAATFYFLQPFTAHHLPSCYVPEGWFPFLAISYMYLIPTLVPSVV  
GLDALFWALGLSLAVQFKLLAQKFKLLGTCHENETAILWNQLKELINYHRFLIDFCCKLN  
KLFSFIFFVQSFITITSASVAVFIVMQPGNLSTRVKCLTFVSYILEMAFYCLPAEMSVNAAID  
VADSVYNSKWFRIKSTEFKKCLILIGRAQIPFTFSGFGLIHINIRMFQLVCKTFTFTFYTYLNT  
VQNRQZ

>TcasOr117

MDKNLDPDDLAYSPLKFLWYGRHLHPGLNPWWTKILVPVNVSVAFLYLVLAIKGIFSSYNH  
DTFFTAECVQTCILVVAIGKFSNFLVHKNLRLVAKKSQFWKLESFDGDLYNECVWIST  
FVKKITRFYYFLNLFVLISFDLQPFTTGYPVPTGCVYVPEGWFNFLTGLLWYLSCAVLFLPGT  
DGFFCSLATSIIQFKLLGYKFKNTKLYKNEPDITLWNNLKLVDYHNYLLSYSKELDATF  
KTIFLLQFMISIGSASVSVFIFMQPGDWSNRIKFLLYFVATMVQTAFYCIPLFVSSAKQIG  
DFVYESNWYQVKDIKFEKCFTLILARTQKNVVSAYGLIWINLGTFLVICKTVFSFYTYLN  
SVNKITSZ

>TcasOr120



MAKKFLDISADSLRLLWLGQMHPLSPFRRFVTFLLNLAAACWLMIALAIKGITISYKSDIF  
FVAECLQTCNLMFHGKFLNLYFQKNNLKSLENRSKFWQLDDFRSEKLYSQMQGITF  
VIKKVLRYYYLLVLCVVFDFLQPFATGLLPTGCYLPEGWFKGLTLTLWFLSVSFFLNIQGT  
NGFFYSQSVSLIVQFKLLSHRFKTTQFDKELKELVDYHNFLTSYCKQLNQAFAAIFLLQF  
FTSITSASLSIFIMQPGAWTNRKIFILYYSYTLVETSFYCIPAEILVNAASEIGNSVYDLWDH  
KIRINRVKCVIILARTQKTMVFTGYGLVNMNLQTFVVYVKTVFSFYTYLNSVRKIZ

>TcasOr123

MAKKFRSDDISADPLRLLWLGQMHPFSPFRRSVAFLVMNVSACWLLAALAIKGIITSYKN  
DIFFVAECLQTCNLMFHGIGKFNLFHRDNLKLLKNRSKFWKIDDFQSEEIYQELSEITS  
TVKKGLRYYYCGVVVVMLLFDLQPFATGSLPSGCYVPEGWFKSLTVMTWLLSLSFLNGV  
QGMDGFFCSISISIVIQFKMLTHRFKNMRLFHNESERKMWKELKELVDYHNFLTRYCKLL  
NTIFASIFLLQFLVSIISASVSIFIMQPGAWSNRKIFILYLA VVAETSFYCVPAEIVNSASEI  
GYAVSELDWYKIRINQIKKCFVILARTQRTMVFTGYGLVNMNLQTFVVYVKTVFSFYTYI  
NSVRKIEKZ

>TcasOr105

MKPALKLANVLGLDPLRNDNYTQLKKMFCALCIVSLFVSAYLEFFSNFTTFETYETAPESL  
IPHFQTMFKMYSLIFSRTEIVELIQMAEQFYKFSQC DERK KLT KLYKRVDLFFYVYASLVAA  
ACVLFIVTLIFKPKPIFLCYGGLHGLESPFEIYLVVDLIGIVIISVTPAFDGLFFYFALYI  
YTEFKLLKIAFKTMSGQELREAVKHDFLLKYIKLNSVYSPIFLYQFFCNLLAICFLFML  
SRSGIPPEMVSFSKYFLCCLAFLVQSYTFCSIGDLITELSEDVSNAIFYTDWLDDEAYENKT  
ARLIIMSRAQNPVMLTIGKFANMNLRTFILIVRNAYSFLAFVNHANZ

>TcasOr106

MESALKLIDIIHGLHPLKSDKYSTMRTISFLSLVILISAQLEFLSHLSVFEVYNSGPHSTIPP  
LQSLKMATLHFYKNELIDLMEKSKSFWKLDKFGDLYKQELSKLHRLVTIIVYIYIALLTAT  
CVQLAVLTLIFRRGKPIFLCYGGLYGLESPHYEISILDAIGIGVISIAVSGYDAMFFFFALDI  
YTEFKMIKS AFKRHS DQTVSSYNKQFIEAVKHDFLLQYINQVNDIFSPMFLQFFSGLLGI  
CFSLFMISRGLQDINTLSIYSAGLLGFTAQSYTFCLVGEVISELSEDISNEIFYTDWLDDEV  
YRNKTAILIVMNRAQESPKLTIGKFADMNLRTFIMIVRNAYSFLAFINNALDZ

>TcasOr107

MENPLKLLHIIGLDPRQSDKYSTIKKVISFLIVLAVLLSALIEFFLHHNESQVYDTAPQSTVP  
NLQALLKMFALIIYKKEIDLFTKGNHFWKLDKFGDCHKQKLT KLH KYVDLFFYVYAVIIT  
GAFLQLALLILIFEPGKPIFLCYGGLYGLESPQFEFYAVLDFLAIGVIAISVTAYDSIFFYFALY  
IYTEFKMIKIAFKRENCAQFIEAVKHDFLLQYISKVNEVFSVIFLTQFFSGLLGICFNLFMIS  
TQGTRDMKSFSTYFVGLVGYTAQSFTFCLIGELISELSEDISNEIFYTDWLDDEVYRNTTAR  
LIVMNRAQESPKLTIGKFADMNLRTFIILRNAYSFLAFINEVLDZ

>TcasOr112

MITRLMAQFAIKGRVGTGGYIMDKVKLAQPLAHLNIIGLDPLKNDRFSKIRT VITVAVFALC  
NVFSSELFLHYNNPHVIVRSSEVVPFFQNDWKIAIMLVYKKNLAQLIQNTSRFWQIDAF  
GKNYQYSMGIKHKYVRIFYLVYRLMLMFSCSQYILLTIGSDRPMILSFGETGGLGSGALLF  
YLIFHIVYLLIIFNVINGFDGLFFFLVAHVLSLQMVKVAFSSSKVITFWNHKRRFKSAIQHH  
RFVLDYINRLNSIYSILLNQHISCLFGICFGLYLFISDGFPPDYEHISKYVPYVIYYITQVWV  
FCFAGQLIIDWSVNISDEIFYHDWTLNRTYENKTDKLI IQRAQHAARLSLAGYGNL DLQSF  
NLVLKNGLSFFTFVNAVIHKZ

>TcasOr109

MGKVKFTEPLEFLNVVGLNPENCSNFSLFRRVISLGGFLVVITLGLLELLLHFEGLETCSRA  
SEAMIVQYQLFIKIAVLLKHRKNLVVLMQKTRKFWPLDKFGQDAKIERPHKLLKAFFAY  
KLIMILMALQYILRKFSKNGKPLAIAFGESKGLSPKVDHLYFVLHSTSTFVVLHAVTGFD  
RLFFFLIGHVTELKLVKKSRYRLTQNRREKFLETVQHHAFALEFVRKLNRIYSQVLLNQHL  
SCLFGICFGLFLVSKDGIPDLGHVTKYVPYVISFITQTFTFCFIGSLLITWSLQVPDAIFYND  
WGKNQAYKYKTDKIIAMIRGQRAAKLTLGGFGDLDLESFNLVVKNAFSFFTFFVNA MNQK  
Z

>TcasOr110

MDKVEFSDPLFFLNVI GMHPFKADKFSKFR LAFSIAVYFAVIFSGVLELIVNSQGLEYARA  
SDTLIPQCQLVCKIFVLAKYKKQIARLLNGSQRFWDLGQFGARYGNSFGKTHKYLSFFL  
LYKVMLTFTCLQFLAVKIIFKIPKPIAISFGETKGLEPLYDHLVYLHAMITLV TINLVNGFDG  
LFFYFIGHVTELKMKVAVAFGDSP IETNWSEEKRFKFAVRHHRFVLD FIEQFNIVYCTMLLV  
QHLTCLFGICFGVFLMTKDGVPDDLDRASKYLPYIVTFIFQTFTFCFAGNLLLSWSLEIPNEI  
FYHDWAKKTTYENKLAKIISMKRGQRAARLTLGGFANL DLSFRMVLKNALSFFTFFVNA  
MMNKKA VTSVZ

>TcasOr73FIX

MTRKHIFLNFTVTILKLSFLWPSNDNYDQWRLVKDASLIVSLMPCALPILAHFVLQITGDV  
YNMVTITENLIALICIIGMIYMTICFVKNRKLKTLVKNLPAFTKYSKTTDIILTDK KANLYT  
KIFVFGVIGNVVYMIMPYLNIEKCQQRQNNDVPCGLVTRCWFPFKFDYSPVFEIVFVHQ  
FYTCLMVSVIILDLTMLICGFLMHITNQLKHLRGGFIKRFDCSSQKIAEDVIYCVKFHTAITY  
SEKTNEAFGTMMMLHITLTSLVISALGFEILVDNFNDSL RFTLHLLGWLVL LLLLICYYGQL  
LIDESIAVAEDIYYVPWHLAPVDVQKDIYMILMRSQKPLTLNAANIGVMSFPTFLRVISSAY  
SYFTLLLNIKSZ

>TcasOr102

MQNQSKPCQLDMMDETYLQFFVKSFTYLNMLPEKTTFC TTIQQYYVSVIITITTFPILADL  
VSQFYEESISFTSVNENFVALSALFAVIYVSVCFINRKHKIRALIADLALFETFSSKAVITETD  
KSVKFYTKLFIVYGIVGNLCYGLLPILGYKKCHESKSVHMTRYGIPCGLVVRFLFPFKFDY  
SPLAELVALYEILVCILGTSVVIVVTTLICGVLIHITVQLQCLRKIILDLSQVNDLEILEHKMK  
FCVKYHTAILDYGIRTDLAFNQMMLLHITWTGFIISVLGFEISTDDYVEAFRFFMHLLGW  
LGMLFVVCYYGQKILDESLAIADAVYTFWLWYKKS VIVQRYVLLILLRSQKPLTLRACGVK  
VMSLATFLGVLYSAYS YFTLLLKLKPZ

>TcasOr76

MMESTVTRLKRMYLWPTASVTSRKP AFFLITFSCFLLYG SVMHLIVNDISMEEVHV IETTA  
GQFGVLYYLTFTIYRK GILEIYADLSNFTKFGKPYNFDKRNKQLNQWSRWFSV VLYFFVI  
SVFAWP GIFTQSCEDLNVALNKTEVCGVVSPVWLPFRFDYKPMKQFVYFWQSFCCLYSN  
GGAGTISFAMSETIEHLIRVEDLKILFPKIVAERSPEVRRKMLAKWVDYHLWLLSIGKLM  
NDTYRYSFSVIVLCAGTLFGCIGYTMKNASTNFNSSIFFGWMESVVICVCGQRLMDA  
FHSVGTTVYNSEWC DTDVDFQKGVILITIRAQKPVRIYAGPFSYVSHLLILTVFQTSYSYIN  
LLNASSZ

>TcasOr77

MKYILMKKTIAFLSVTGFWPKTKESTKTRAF CILFSSSFLFGSLGYLIVYRKFGSDDIDSIE  
TATSHFGVLYFMFFWILKRDGLVHIVNLLSDFS KFGEPFFNDRNRQLDYLLQYCIFVLSVA  
TGGVFLCPIIFVKNCEMVKQEKNLTKVCGLVSNVWAPFDYSEYPMKRVVSLWESYCCFIN  
FGCGGIMSFTMIKTMEHLHIRVEQLKDMFPDVVNEKNLAVRKQKLEKWKYHLHLYDIG

ELMNNTYRYCLSVIVLCV GILFGCIGISTMQPGSSHNSLFLFMGWFQ SICILCMV GQRLLD  
VFLSVGVMAYDSAWYEKDVDFQKAVLMIMIRARRPVLIYAGPFTNL SHLLILGVLQTSYS  
YINLLNAKZ

>TcasOr78

MGHAIMTEILTYLTLMGFWPRSPKSSKASAFIILSTSFLFFGILFYLVNRQFGSSEIDSIETI  
TSQFGVLYYLILFTWKRNDIVEIVELLSDFSKFGKPPFFDQRSTRNLNYRLSCIVLILIVANIVV  
AALPVIYIDSCHKANEQLNLTCTGLIAPVWLPFDYNEYPRKHLVFAWEVYCCVMNYVG  
SGIGALTMVGTMEHVIRIEQLKYIFPKILDQPNPIREQMLKNWVRYHLALFEIGRLMND  
AYKWSLSVIVLCV GALFACIGISMLQSTASQINSICLFFGWFPSIAFLCMWGQRLLDSSLSV  
GTAVYSSRWYDMDVAFQKSVLMILIRSQKPIRISVGPFTHLSMLLLLGVFQSAYSINLLNA  
TSZ

>TcasOr79

MGHVIMNEILTYVTLGLWPRSRKSTKTISYLILSSSFLFFGSLLYL VVHRKFGSNEIDSIET  
VTSQFAVLYYMTFFTLKREGTVRIIDQMSDFSKFGKPPFLDQHNKRLNYLLSYFVICLFAI  
VGVVALPAIYTG SCHKANEQLNLTCTGLVAPVWLPFDYNGYPLKFLVFAWEGYCCIITYA  
CSGISSLVLVGTMEHLIRIEQLKLMFPEILNEANRHIREQKLNWVQYHLALFGIGKLMTA  
TYTYCLSVIVLCV GILFGCIGVSTMQSASSNNSVFLFLGWQSLIVLSVCGQRLLDTCLSVG  
IAVYNSRWYDMDVSFQKSVHMILIRSQKPIIYTGPFYSYLSHLLILSVLQTAYSINLLSARG  
Z

>TcasOr87

MKHVIMDELLIFLTLGLWPRTPTSPKIISYLMYSTSFLFFGSSIIYLILHRKFGSDEIDTIEIIT  
SQFGVLYYLLLVVKRDGITKIVNLLSDFSKFGKPPFLDQRSRRLNLLLRLFVTVLLAATVA  
IVSVPVVFINSCKQNLQNLNATKICGLAAPVWLPFDYTNPRKYFVSAMEIYCATMNYAG  
SGSGAFLVIGTMEHLVIRIEHLKNMFPEILNEPKQIREKRLKKWIEYHLSIFEIGELMNETY  
KWPLSVIVLCV GILFGCIGVSTMQSVSFQNSSVFLFFGWQSFVLCFWGQRLLDSCLSIRK  
AVYNSKWHEMDV SFQKSVLMILIRSERPVIHAGPFYSYLSNLLVLGVLQTAYSINLLNAR  
SZ

>TcasOr89

MKEAVLQQSKKEMHLLNLWPKGHVKHFRFRYVITLIIVSPFTLGLTLTHFINVLKENLDVDL  
SGDISVIAVVTGLHFMLITFVWGHKKIAYLWENLGPHEYFGKPDNFEKRCCKLNFYSRLYA  
YYCYLGLTVYIIMKNRGGIECRRLNVERNLTICGLVTTFWAPFDIDFFPFRQILFVDQVFAT  
YFIVKGGAAISFTTLEVGEYIILKIKHLKRLVKEVFDDPREEVQRKKLVFCIKYHQYIISIQE  
LYDGRYKHCNGCYILMVGIIASLSNEIMKNHNIEALLHLVGWVFSFYICCFSGQSLLSESL  
TIPDAAFESKWYEAPVYMQKDLLLMMLRSQKPLMLHATPIGVMSLSL FITLVKTSYSYFT  
LLNQSTZ

>TcasOr90

MAKDTSPVLRESIEVMKYLQLWPQNERTNLRRRYFIVIFLCSPLHLGLATHLVVCLKDNLD  
VDLSANIAVLSAVTGLTYMLIVFVWSQDKLVHLLAKLDTHEIFGTPDNLTKRSRRLNFYAK  
LYSYCYFGIVYISLVQIIEMPQCRKMNEEKGLSEICGMIVPFWAPFDIDWFPLKQIFWLNQ  
LLGIYIIKGGAAVSITTFEVAQYICLKIKHLNRLLEAFDDPCDVVVEQKLLHCIRYQQHIIR  
TNELFNVCFKHCNGCYVVMVGIIASLLNQILKEKSVGALVHFAGWICSFFICCHAGQAVIS  
ESLTIPEAALDSHWYEAPVKYKKVLLLLLVRSQKAFNLQATPIGIMSFDLFIALLKTSYSYF  
TLLHKSTZ

>TcasOr84

MTEEKELRLCLWSCYYLKLSLMWPLKREEFKSSKGLYLRLLVFVIISGSTFTAMIFMHLYK  
SLKVGSYDVSEDLAILASNIGYVLMMTMYVSRQKDLELLLLDLSDFKTYGKPPNFDKVR  
KRMDLYAHLIFFYSMFGSFVYNMDKIILIDKCKEARRINEVCGSAIPFWTPFETEDLFTLTL  
VITYVLINIFVVKVAMTVSVQVLEISSHINLRIEQLKIFIAGCFDRDFKASRERLDFCIRYH  
NVIIDFSERFSRCFSYVMFIHLAITGIIIGCLENQIVQEHQPEAMLHMGGWSTATFIACYGGQ  
LLMDASTSIADDEFYNCPWYEADVCMRKDLILILRAQKALFVSTGPFNVLSFALFVSIMKL  
SYSIFTVLSZ

>TcasOr92

MKNQEIKICRATLTVLKYSLIWPSEADEMNPGKWYYIRVVTFILFTCPWVLSVFMHLIVSIR  
NNADIHLSEDVALMVAFTGVYYMTIYVKKQPKVAFLLRDLSYFQFGKPPGFDETERILGF  
LSKLTFCYSVMAVVIYNYIKYRQKPECERMNKLKGLKENCGMLTPTWWPFEINYSAPFQL  
IFLYIFTSTQVMMKLSLMISFNVLEMAHHILRINHLKTMILESLEQDYEASKRRIKTCILY  
HLEILGFAERMDDCFNSGMFAHLTITAAICGCLEKQFVDGDNQLGSLHIFGWILALFLAC  
LGGQHLINASETISDAIWSSKWDADLRLRDKDLIFMMARSQVGLYLVNCGGFGILSYALFLS  
VIKMSYSILAMLTSZ

>TcasOr94

MAIKICKFTRKNMQISLIWPREFEEINPGKWYYIRIVIFLITYGVFPFCTFLHAVVVIHNNLDI  
RISEDIGAVVSNIGISYMAIYVQQNQIAYLLKDLSDFKDFGKPPFFEEENKRLNFWISICTF  
IYPTCGASLYNLSKILEKSECNKINEENGLPATCGFIFPIWVPFNINYFPLFHIMLISTWFCTT  
MFVRLHLSISYNAFEIAHHILRIKHLNGMIITCFDCQDYKISRQKFTTCVLYYKQILDLSNR  
LNQSFSSIMFVHFTMTSAVCGCLEKQFVDGEYVGGFIHLVGVIIISLFIASVGGQDLVNASQ  
SISEAIWSSKWYLADIRLKKDVLFMLMRSQKDLHMSVGSFGVLSYAFFVSVLKMSYSILA  
MLTSZ

>TcasOr97

MNNQKIQISNMTRKVLRYSLWPKTNEELNPGIEYQFSVLGFFLVTGVVLVCITIRFFITIKA  
VHEVDAEVLAILIASYGSYYMICAHKLNQHKVALLMRDLSVFNNFGKPPNFDKRNNQLN  
FVAKLLALYSFLATIFYNGEQLINKTECKRINKEKGLSDHYCGLLAPCWLPFEIDYFPVFHL  
ILYAFTSGYLLIKMAIHISYNAFEIVSNIVLRIEHLKAMILETFENRNKQVCHKKFLQCILYH  
IEILDFAARLDDSFNSMFGHLALTGGICACLEKQIVSGVNVVAGTLHFHIFGWILALFIGCVA  
GQYLINASEILPSAIWTAKWYDADLELKKKVLFMLARSQKSLFIRAGPFGILCYPLFVTVL  
KTSYSILCMLTSZ

>TcasOr98FIX

MVKKESEIKISRVRTKLLQYSLLWPTEGEELNPGKWFYFRIFAFLSFTSLWCIAICMHFIFV  
MKDKPDWDPTEEIAIIAIYGTYYIVLAYVKNQRKAAGILRDLSNFDKFGVPPGFEEEEQRL  
RVYIICVFIYGFITITFYNFYKMSQKKSCERFNIEHNLHENCGLLSPVWIPFRIDKFRYELVF  
LYLLTCCHLLMKLPLIVSYNALEMVHHIILRINHLKIMITECFDDPDYEISRRKLTQCILYHT  
EILEFATRVDDCFNSCMFAHLTLTGTCACLEKQIVAGFSRFGAILHFFGWILALFIACLGQ  
QFINASDTIPEALWASKWYNADLRLRGDLLLLMMMRQRDLHITAGPFGVVSYALFVSVLK  
ASYSILCVLTSZ

## IR sequences

>CbowIR6

MNLRTKMGLYKNILLFQLLLGYCEGQTTQNINVLVFNNEEGNEVAEKALDVALTYLKKN  
KLGISVDIRKVVGNRTDSNAFLESLSCTYSSMLDAQAYPHLVLDTTMTGLGSETVKTFTQ  
ALALPTISASFGQEGDLRQWRNIDDNEKDFLIQISPPADIPEIVRTLVLNQITNAAILFDKS  
FVMDHKYKSLQNVATRHIITAIKDGNQVVDQLSQRKLDLVNFFVLASLKNIKRVLDA  
DSVGGFFNRKFAWHVITQDDGEIKVCVRNATIMFVKPLPNAAYQDRLGTMKRTYQLNVEPI  
ISSAFYFDLTLHSFLAIKEMISDGVWKSVTNYITCDDYNTENVPKRNGLNKKYFNKESTE  
SPTYGPITVLSNGLSYMETFQMLTSVGVVDGASDKSTILGTWSAGFYNNLTIVEQQVMVN  
LTADVYRVVTVEQKPFMFRDESSPRGYSGYCIDLIEKIADILKFDYEIATVDCFGTMDEN  
GKWNGVVKELMEKRADIGLGSMSVMAERENVIDFTVPYYDLVGITVLMKLPETQSSLFK  
FLTVLENEVWLCILAAFFTSFLMWVDFRWSPYSYQNNREKYKDDEEKREFNLKECLWF  
CMTSLTPQGGGEAPKNLSGRLVAATWWLFGFIIASYTANLAAFLTVSRLDTPIESLDDLSK  
QYKIQYAPLNGSSTQTYFERMANIEERFYQIWKDMSLNDLSEVERAKLAVWDYPVSDK  
YTKMWQAMKEAGLPNTMDEAVAKVRASKSSTEGFAFLGDATDIKYMELTNCDLTVVGE  
EFSRKPYAIAVQQGSPLKDQFNAILQLLNRELERLKEKWVNKNPEKKDCEKADDQSD  
GISIQNIGGVFIVFVIGLACVTLAIEYWWYKYRKGSKIIDVREVAHNPTKPPTFPKQKFSE  
HNPDNTPKPLPKRSKF

>CbowIR75q

MLNSLTLFMILFLNFSSAMKNYTEIINIVDELTKQNIPSEVTAYLCWSKVLKANLFRKLSA  
SNILTKIIATDDIVDLFPSEYQIYLVLDCEGSNEILKKAQRKKLFSRPFRRWVFCGNIEQPLF  
NDLYFGVDSRIFIDNAGSEYHIKMPYKREKNSKKFTVNDLAEWNSLQGFTRFDEFAAR  
NRTDLFGMNINISCVYTDSDTLNHLEDYRNIHIDPLTKLSWILVHHLMSILNASATVIFRNT  
WGYRDSNTSLFSGMIGDLQTGEAELGGTASFFTIDRIDVVEFYASSAPTYMKFIFRAPPLSY  
VTNVFTLPFHTYVWYCSFLLLVLIFFAIYVIVKWEWKDVVFREKLERMHDGSIPLRPTFF  
SVLLMEIGAITQQGTDEPKSNAGRIATIFTFIALMFMYSYSANIVALLQSTTESIRTLEDLL  
NYRISLGVQDIVYAHHYFEVRIQLSIDSYPNQTPGLKWLNTQDLGKLWR

>CbowIR8a

MRNVKIILLENEGQDTILTWYRSIVQAFKSPIKFEEFLISVDGEEFDRERICQAFSNGAMMIL  
DLTWTGNDLARTVSMEMDVPYLRLIDVSLSPFFDLLHEYLNFRNSTDVALIFDDPSRIDQAI  
YYWIDNVQIAMSISESLDAMAAKLRDFRPTNSFAIFAETKNMEKMFKIALEENLVTLP  
RWNLVFLDFHHKSFDRGLLKKMPVNLTLTLAGLCCQLLNLSYCECPSRFNTSKMFLKIA  
LNMLVTAIEELFKDDFKFHDNIDCDSNFTKDNEESVRKTFEEVLNKAVGNDNLIRLDNSSN  
LRLKTTGSIEIGTDVGTVEFAKYENEAITALRNKIVKPIKAFYRVGITHALPWSYQIKDPVT  
KKLVWTGYCVDFTAklaEKMNFDYELVEPKKGTFGKKHNGVWDGVDGLASGQTDLA  
ITALIMTADKEEVIDFVAPYFEQTGITVMRKPVRKTSLFKFMVTLKLEVWLSIVAALIVTG  
FMVWFLDKYSPYSARNKAYPYPCRKFTLKFESFWFALTSFTPQGGGEAPKALSGRTLVA  
AYWLFVVLMLATFTANLAAFLTVERMQAPVQSLEQLARQSRINYTVVSNSQTHKYFINM  
KFAEDTLYRMWKELTLNASTDDSRVYRWDYPIREQYGHILLAINDSNPVANAEEGFKNVN  
EHLADYAFIHDSSEIKYEISRNCNLTEVGEVFAEKPYAVAVQQGSHLQDGISKMILLQKD  
RFFEGLQAKYWNSVKGDCPNRDDNEGITLESLGGVFIATLFLGLALAMITLAGEVLYYRR  
KRKTKELNIKQSKVFPEKPLDVFPKPLLLGNNQITIGNTFKPVNLKEKIRKEREAMKISHI  
SLYPRARKPINPFEIK

>CbowIR41a

LFLPGDNLLENLSHIYSMQELKYIADIVIVNREYKDEDSQGLYMSDNVFLSWTHSYRGMD  
ENAKRMFLDLWFSKNQSFMLDENLYPDKLVNQMRKLEMATFQYEPYSIIGSSETESKGS  
EMVTCLTFARHYNMTPVLVVDNDEGYWGDIFDNWTGYGLLGNLVEDKADIGFSALYWE  
SDYYFLDLSKPLVRTGITCLVPAPSLAAGWTTPLYSFSTTMWAAVGSMMFFVCIFVQFFMHY  
FHAKIYDDTNQSLKLLDRSILCVLKLQVQVTTRETTPPGRSGKYFMGLLFTFSLFLSSSYS  
SGLSSIMTIPRYGRPINTVEEFAESKISWGATQDAWTMSLKGVEDP

>CbowIR5

MGLIEFVVASLCLNATCEPEDAVVPGVSTHLLKLNELAEELKEETLTVTTFENGQLSGYISQ  
NGSFLGTGVAFDIFHILQEKFBNYITVLPDADIFMDGFNKKGAKSLLEAKQADIAVSFLPV  
IESFRNDVVYSRVFDIAEWNVLMNRPKESATGSGLLAPFTTAVWILIFSVLVVGPIMYLM  
LIRAKMCKDDNNKIFSLPSCMWFVYGALLKQGSTLNPKSDSSRILFSTWWLFILITAFYT  
ANLTAFLTLKFTLPITDPTDISRKNYHWVTNKANGLRDYIEYEKHDRLSNGRTLVDIGK  
DRYYADMKDLIDILEEYVKKRNMMFIREKTLIKNVMYRDYQEKTKRGVDEEKRCTFVMA  
DFPITMFSRGFAYTHDFKYAELFDRTFQYLIEAGIIQFKLRENLPDAEICPLNLGSIERKLRN  
TDLMLTYVIVASGLGIAASVFLLEILWRMSKAKYKRTRKRKATTWLEKNNNLMKAKCLH  
LHTNSSPPPPYQALFRPPFYSDRDGGQKKTINGRDYWVIDKSDGLREIPIRTPSALLFQIS  
N

>CbowIR21a

MDYIIRANYTSKSKRTVLHVSSQCFALFKVAVIFPKKSIYGETLSQGVKLMIQAGLLSKIRS  
DVEWDMIRSPNGKLLAANSRTTGLKIISYEDRALTLDDTQGMFLLGAGFLIGAAALTSE  
WFGGCLKLFKRIRPPSSDSSIASNPRVHTGRMPRKK

>CbowIR2

MVTEFSCDKLGSFEFLKKLITQGIPTRILLIDKDELSYLFPPNCQIFIVNLQCENSTNILKKA  
NSLKLFSFPFRWIIYHHEPINETIFEESFLSLDILVDSVTLLEENKNKSVSATKIYKRHRNHP  
LVIEKMGYWTKTAGLRDDREKIMVRRRKNLQQIPLNTCIVITHNDSLKHLTDKRDKHID  
SIKVNYYVLVEHLSDIVNVTLNYSIQNTWGYKNNKSEWSGMIGELTKNEADIGGTPLFFII  
DRVDIIDYIAMTTPTRSKFVFREPKLSYVTNVFTLPFDDYVWASTIALVCIISMVLFILKWE  
WKKKDLPSEKSDSNVPELKDSLTDVILFSFGAFCQQGAPSIPFSVPGRITTIILFVSLMFLYT  
SYSANIVALLQSSSTSIQTLEDLLKSRLQVGVDDTVFNRFYFPNASEAVRRAIYLQKVAPPG  
KKENFMSIEEGVKRMRQGLFAFHMETGPGYKLVGEMFHESEKCGLKEIQYLQVIDPWLA  
QKNSSYKELLKIGLRQIQESGLQTREVSIIYTKPICTSRGSSFISVGLVDCYPAAVVSAGG  
AILALIVWILELGLYRPMWISVKKVFAKSHEKIPGSIEQWPEWPYLK

>CbowIR64a

MDPPRTIFTLKDLAESQLRIGIEDILDRNYFVQTTDPDAITLYEKKIKGQSNSSGFYSPSEGI  
ALVRNGGFVAFHVFETSTAYPIIEEIFTNQEICELDEIQMYRTQPMHTNLQKNSPREMMNFC  
MLKLVENGNMDRLRKHWDARRPNCIESAKKQEIHVSLSEFCCSPIALTLGVCFLIFLVE  
CSINYKERLKKVWTFKNHSSKQYPFME

>CbowIR68a

LYTYGMLLLVSIPKLP TGWSLRMLTGWHWLYCLLVVTSYRASMTAILAKPAPKV KIDTLQ  
ELVSSQLTCGGWGEMNSEFFKSSDDPLVTTISQNF

>TcasIR40a

MRRDHGGDLVSASFVAGFLFEEICICFDKNTNINFLQHLLVRFVSNNAIKLFNITTVVQ  
DKYFAFLNYQVTNHLGANTIFFSSHKFYEHVLEINERDFIRRNLIYIFNWGRRPFVSRVFR

NIINVMKVFVITNPRNDTFRIFYNQAVPYKHHHEMNVNWWQHGVGLFNHPTLPAKYNNV  
FKDFKENVFKIPVIHKPPWHFVQYGNDSIKVTGGRDDRILSLLSKKLNFRYDYFDPPERIQ  
GSSASENGTFKGVGLIWKRAEFFIGDVALSHERANYVEFSFITLADSGAFITHAPSKLNE  
ALALLRPFQWQVWPAIGVTFVVVGPVLYAIIALPNAWRPRFRVRSARLFFDCTWFTTTV  
LLKQTGKEPSSSHKARFFIILSISSTYVINDMYSANLTSLLAKPGREKAINNLNQLKAMAT  
RGYDLYVERHSSSYSLFENGTGIYSRLWQMMNRRQTHFLLESVEEGVQLVRDSTNKAVIA  
GRETLFFDIQRFGASNFHLSEKLN TAYSALQLGCPYIEEINKILMAIFEAGIITKMTENEY  
EQLGKKKQTTSETEKELIPGVKKENRRVAKVSEDNEKLQPISIKMLQGT FYLLCIGNIFSGF  
ILLAEILVYKHKTYKHKRRHRFVYLRKIRHSVASKFGAVVDAVRRVYRRAMHDAFVAT  
LEYLE

>TcasIR21a

MQRGLIVLKLCLTALALKSLDKRALQKSHEKSQLEKWEDKFLNRDPSFDQTASLVNLISK  
VALDELSGCSATILYDKFTETSSDLLLEKLFRTFPIPYLHGQITDKYHMKVPKLQTSQDTCT  
GYILFLKDV MRSKDVVGPQTNNKVVLVSRSSQWRVYEFLASEQSQSFMNLLVIAKSEKIV  
SSSIARLICLALHLKFGTALAIYAPNGGKSAVYPSVIANVPKLGFRSAESVTSVITQNGANL  
GIGGLYITDTRLKATDMSHIHSQDCAAFISLASTALPRYRAIMGPFHWTVWLSLTLVYLFAI  
FPLAFSDKHTLRHLLDKPEEVENMFWYVFGTFTNAFSFFGKDSWSKTDK FATRLLIGFYW  
IFTIIVTACYTGSIIAFVTLPVFPATVDTPEQLVRGKYTVGTLDKGGWQYWFENSTDPITQK  
LLTRIDFVPDIESGLKNTTKAFFWPYAFLGSRALDYIVRTNFTTINKRSLHISSECFVFPFG  
VSIIYNKNALYSKIIDQGV LQAVQSGIVDKIKNDVEWETMRSASGKLLAANSYGKSLKALT  
VDDRALTDDTQGMFLLLIGIFLLGGASLLSEWMGGCLHLCKGNRNQSATSISQSNYRSHE  
VPTPREKLDSMQFNSFENHKIEEEIVEERNCIHRQDDDDIEEHINRLDFEGVFGEANPDS  
RTGPEEELSFKNTTKAFFSLYAFLDSRALDYIVRTYFTSMNKRSLLHISSECFVFPFGVSIY  
NKNALYSKIIDQGV LQAVQSGIVDKIKNDVEWETMRSASGKLLAANSYGKSLKALT VDD  
RALTLDDTQGMFLLLIGIFLLGGASLLSEWMGGCLHLCKGKRNQSATSISQSNYRSHEVPT  
PREKLDSMQFNSFENHKIEEEIVEERNCIHRQDDDDIEEHINRLDFEGVFGEANPDSRTG  
PEEELSEENGKK

>TcasIR76b

MGLFEIALAALCLNATCPGEEEPPEFPEVQYLAPDSNDRKTLFAQLTEQLKNENLIITLKN  
DRLSGTEKRNTILGKGIAFDLLNILQDKFQFN YTLIEPKANVWGAEKFGVLDLLKDKKA  
NLSAAFLPVLTQYSNHISYSPSLDTGEWVVL MKRPKESATGSGLLAPFNLPVWLLILLSLV  
VVGPIYFIILYLAQKLCDDNNKVFP LPAIWFVYGALLKQGTTLNPMTDSSRLLFATWWI  
FITILTAFYTANLTAFLTL SKFTLPITEPKDIGEKRYKWVTTKGNAL EDTVTVNESLTELGI  
LGQPQRYLYVSDSDILRNYVHKRNWMFIREKPIVEYV MYDDYKEKTRNQIEEAKRCTYVI  
TKFSVVSFSRAFAYSKDFKYKPLFDSTLVQIVKCHKCF SLLSRIQYLVESGIIKFKLREELPD  
TEICPHNLGNKERQLRNSDLLMTYEIVGGGFII SAIVFII EVIIRRQKKPKTKSLPLQNP NKH  
TFEINLNNY EKFGHFPYSSKFVTPPPPYHTL FNPPHKSDNMKKNRNFNGREYWVYDSISG  
ETKMIPMRTPSALLFQYTN

>TcasIR93a

MLELVLSAFVCVIRGDSFPSLLTTNATLAVIIDREFLSNEYEVIKHAIESYLVFAKREILKH  
GGVNVQYYSWTTINIKKDVTAIFS IASCPDTWRLFRQARDANLLHMAISESDCPRLPDEA  
ITVPLITRGEELPQLLLDLRTRQTYNWN S AFILYDDTL SRDQVTRVVK SITAQYSNLRVNA A  
AISFVKLETRLPMDEIRRQVKEILSSVSIKTVGGNFLAIIGYELVELLMEYAKMFLVNTRT

QWLYIISNTHFRHKDINRFRQLLSEGDNIAFLYNNTVNNDTCTGGIQCHCEEILSGFTRALD  
EAILFEWETSSQVSDEEWEAIRPSKLDNRNSLLQGIKTFLLRGQCDNCTSWLMKTGDTW  
GREYQQNGTDSGGLISVGNWRPSDGPSMSDELPHIVHGFRKRNLPIVTFHNPPWQIIRSN  
ESGAVSEYAGVIFELIKELSKNLNFTYTVELAKIGQEFSANLTKNEAQVVTNFIPDSILDMIR  
NKSVAFGACAFTVTEESKRLINFTSPISTQTYTFLVSRPRELSRALLFMSPFTGDTWLCLSA  
SIVSMGPILYIHKYSPVYEYKGLSKRGLSSVQNCIWYMYGALLQQGGMHLPQADSARII  
VGAWWLVLVLLATTYCGNLVAFLTFPKIDIPITIDELLAHSGTVTWSMPKGSYLERTLKY  
TTEPRFRYLFDDKVEVGNFKNMIEDIENGKHVIDWKIKLQYIMKQQYLDSRCDLALGL  
DEFLNEQLAMVVSQDTPYLEIINDEIKKLHQVGLIQKWLTDYLPKKDRCWKNNRHIVEVN  
NHTVNMDDMQGSFFVLFLGFLLSFFITIGEKLWHKYVTKKKMKIIPFTT

>TcasIR64a.1

NKISLILVILSKTETYIHKSCLSNAIVDFAILANVAFSLRISCYKLFMHKLIANVFYNQLDQV  
LNRNHYHLAVIIDS GCIDYADFAIQDKKYFYETYHVLVPTTPQNLNNSLNFQKSPLNINS  
DVNVAILNGEGTKWSILDVYNPASHHGQFTVTKLGLCDETNGYQAKIAGNKYWSRKN  
MTGVQFKSAVVVPDPSIKLNDYLTSDKNRQLHSMHRFQSVTVNYCREMYNFSLEIQRTNS  
WGYLTPNGHFDGLVGLLERRLVDFGSSPLIYKLDMPVIDYSYGNWVLRSTFIYRRPKIIE  
ASYKIFLRPLSRTVVICIVLMMVLLMLFLKVVSREKRLQKRNLDSSWSFLFLFTLGAF  
CQQGATCHPQLSSRTLSIFVFLFCILTYQFYASIVSYLLIDPPRKINNLKDLSDSNLRAGIE  
DILIDRNYFVQTTDPVAIELFNKKIKFSNNNSGFYEPWDGLDLVKQGGFAFHVETSTAYPIIE  
ETFTNEEICELEEVQMYRTQPMHTNLQKNSPFREMNYCMLHLVENGLMYRLRKYWDA  
RKPMCIESA KFTFNVLKEFSSGLIVLSYGILISLGLLLREVIVHKK

>TcasIR64a.2

MSPPLPFMILLSVLTQTHALLDINLIENYFTEKSIKSATVFGCFRKTEQLNLVKIFSRGSSPIS  
VLNLNQAGVYQSIKSNHQIGVVLGDGDCPESESFLITVSPGFTHIAPNVVFISVRSTETXFD  
VKHHWLILSKSIQFLEKIKNAVVNINADIHVAVQSGTNWTIFDVYNPASEHGGSLKYTRVG  
FYSRGRGYNAQTNEAKYWRRKDMTGVTFTKTMVLLVPFEGPLEDYLHNDNRNINTFN  
RFQNKLLRFRCDYYNYSMIVELGSSWGYPFNGSFDGMVGAMEKKLIDFGSSPIFVREDR  
ARVIDYGRNTWSWKAGFLFRSPKSRTSIEIFLPLSTSIWLITGVLATASIVILKMVTTFERN  
RYHSTSETSWLSFLFTLGALCQQGSPWVPKMACGRITAIIFLLSLIYQFYASIVSHLLM  
KPTNKIRNLKDLTDSSLKVGCEDIYNKDLFAHTT DKVLKDLYAKKIYGKGN TSHFFPPEK  
GLDLVRQGGYAFHIEVARAYPIIETTFPDNAICELREVKLFKNTDLYNTMQKGT PFRDMLE  
SCFQRLAEQGILDREKKHWHPRKPECIQSSQAFVTFHVGLDEFYPALLVLLIGIVISLTVLV  
VEKQIHIAREKMEREGVVF

>TcasIR64a.3

FQLRVLMERLFFLSVLAVIITNCTDNHDIITSYIKEKSVKYATVFGCFTKKEKINLVKIISH  
ICPISVFDINRLNIENRMESRHFHTGIILDGDCPSAEKFLINCGRSYLFDVKHHWLIVASSEKI  
REKFNNVILNINADINVIIEKPSNWSIIDVYNPASQHGGLVNFTRVGFYKXHDGYKIKYTG  
VKYWRNKNLTGVTFKSMVVVYTSKTXKNSAYTIFQLPVPFEGTLQHYLSDDDNRDNTF  
NRFHSRLISFCRDYYNFSLDIEVSKSWGYNEDGTFDGMVGALERKIIDFGSSPLFLREDR  
ARVIDYGRNTWILRSLIKQQFRIISNWGFSAAFIFRNPKVRTSLEIFLRPLSSVWLITGLLAI  
VSIILKLATSFERRRYVYDVETSWSISVIFTLGAFCCQQGSPSTPKMACGRIATFFIFLLSVLIY  
QFYASLVSHLLNKPLTKIKNVRDLLSPLKAGCEDILYDRDYFLHTT DKVAKELYAKKIL  
GKSNSSNFHTPEAGLKLVAEGGYAFHVETATAYPIIESTFQDQAVCELREVPLFRTQPMHAN  
FQKKSFRDMFDTCFQRLAEHGLLVREKXHWHPKPECIQSSKSIRFNVGLDDFYPALVIL



LVGIVASLLILVIEKEFRILTENPA

>TcasIR75q.1

SFLGTILT VYKQLAEKKIVLNVLTNHWKINQTKLSQHTFLVGD TLC PQFN SLLSHVSKFFC  
YQNSQQTLGQIITSSXKWL VFDQNSTVNTNDLLLD S NFAVASQISNGRFHLKLCYKRAPNE  
TIKFNEIGVFSNGFEYYNHFIPTNRSDLSGVNITVS YVVTKPDY PFDVEDYRFRHLEAFSK  
LSYAMVYPMLEMLNCTKKFIQRSSWGYKGANETQFVGGMFGDIQNGTAEIGGTVSFYTV  
DRMSVVDYLSVTTPSDLKFILRAPPLSYVNNLFTLPFDTKVWYCLYFIVGVTVLILYVIVR  
CESTYENALERRNNIDNIKPKFFDVVMLQIEAITQQGSENEPKTMSGRIAVFIVFLVLMFLY  
TSYSANIVLLQSTSANINTLQDLLNSKITLGVEDVVYSHHYFETQTEFTRKSIYEKKVAPK  
NQKSNFMTTEMGIEKMKDEFFAFHVETTAGYKQIMDTFQEHEKCGLIEIDYLNVLPSITI  
RKNSPYKEIVKVNFRKIYESGIRHRQLNRIYKPKPHCVGKGGSFKSVGIVDIYFSVEIFAIG  
CFMALWLLLLEVLFKKKIKFLVQ

>TcasIR75q.2

MKILIVFICLLINETTQNNFTDNLIVNTFNFIKILNVPVKISAHICWTRGKFD SLLMKLYXTV  
LANTIHFIKSISDKYNTNLIK NVSPKYANPEHQLFIIDLKCNDSLSVLQQA EKFKL FKSPFK  
WLLLGNSESLPNLYFGTDSQIFVTEPRS QLDDIKTIYKYSMPVPRFVQHSFDRFYTNTKRT  
NLMGTTIKISYVITNLD SLNHLWDYRLQELKKKLYHFLICRN SHIDAINKLN IYLVHNLMD  
FLNASRQFTMQPTWGYKNSTTGLYSGMAGDLQKGLADLGGT PLFFTPDRIDIIDYIAATP  
TYMKFIFRAPPLSYVTNVFTLPFDSAVWHYCFVMVAVVVVCIYVIVVWEWKETKFEEKD  
THSHIDTLRPNIFDVVMFEIGAITQQGTNAEPKSNSGRIITIFSFLTLMFLYTSYSANIVALLQ  
STSDSIKNLEDLLNSRIKLGVEDIVYAHYYFENAQEPVRKAIYQQKVAPKGQKPNFMTAEE  
GIRKVQQGFFAFHVELSTGYKIIGEVFQEGEK CGLKEIEYVNLIEPWLATQKKSPYKEVMK  
IGMRKM HETGVQNREIRKIYTRKPQCHSGGSNFGSVGLIDCYS AFLTFGVGIAFAFLLFVM  
ELIVRRYFIRREKERLK

>TcasIR75s

IVLPMINDLIEHFNKTQIILAYLCDKNGTNLLLIRNNNNTNFRRLSGSEPLFXKKLYQVNVL  
SPNSRDMPYPTPPAFLTYVLDAGCSNTKQLLLLLVPVITHXLIFGNNILKASEQKQFATPFKW  
IVYYNPNVELSFFIDEYFTKTNILVDSVTLATINPTSGTFDLNKIYKRKINGSIIHENIGIWGR  
GLGVTDGTGYEKITYKRRRNLTKTVLKSCIVITNND SLNHLTDKRDIHIDSIAKVNYVLVQH  
LSDTINASLEYSVRGTWGYKDNKSQWSGMIGELTRNEADIGGTALFLTSDRIRVIDYIAMT  
TPTRSKFIFRQPKLSYVANVFTLPFDASVWASVCGLLVIIAGLLYVVVRWEWKKKDYVQV  
VVFFAFWVDFPSSVFCRTNRTSRKFTILGSXVFITFGALCQQGSSSVPF SIPGRITLIFLLVSL  
MFLYTSYSANIVALLQSSSSSIQTLQDILNSRLDVGV DNTVFNHFYFPNATEPIRRAIYQQK  
VAPPGQKPKFYPIEEGIRKMRQGLFAFHVETGPGYK FVSEIFREDEK CGLQEIQYLQVPDP  
WLAIQKNSSYKKMLKVGLRLLQENGIQEREVGLIYTKKPQCLARGSSFISVGLVDCYPAA  
VVLAGGIGAALAVLILEIYVHQRFVGFLL

>TcasIR8a

MVISENLDKTTANRLKAIRPIPNFAIVATSSNMEELLQTALDENLVTLPERWNLVFLDFQY  
QQFDKKRLKNMPINLLHMDEEICCRFLQSEKCECPHDFNLQENFLSLATNTLAKILKTLTM  
ENLLRADLNCDDSR YSEATRTRFYELLQQEVD SNDLVFKENFGLHVNINGVIETGDEKVAE  
YNYKTGVTVLDGKKVEPITPFFRIGITHALPWSYKETDSSGNTYWTGYCVDFTEELSKLM  
GFGYEFVEPKSGTFGKKRDGVWDGVVGD LATGETDLAITALIMTADREEVIDYVAPYFEQ  
TGITIVMRKPVRKTSLFKFM TVLKLEVWLSIVGALIVTGFMVWFLDKYSPYSARNKKAY  
PYPTREFTLKESFWFALTSFT PQGGGEAPKALSGR TLVAAYWLFVVLMLATFTANLAAFLT

VERMQTPVQSLEQLAKQSRINYTVVKSDTHKYFINMKHAEDTLYRMWKELTLNASTDD  
TQYRVWDYPIREQYGHILLAINDSNPVANASEGFRIVNEHTDADFAFIHDSSEIKYEISKNC  
NLTEVGEVFAERPYPYAVAVQQGSHLQDEISKILNLQKDRFFEQLQAKYWNHSGKGCPTT  
DDNEGITLES LGGVFIATLFLGLALAMITLVGEVLYYRRKSKIQNSETKKPKTVQTSENWKT  
DTLMPVSLINKDKQSVTIGTEFKPVNRNRDLSEFGHITLYPRARNRITQTSNE

>TcasIR25a

MASSSAIYRIAIYSRIATAHLNYSDFLNNVLTETHKMLKLVAFIFYCTNLANGQTTQINIVL  
FVNEEGNLVAEKAVDVATNYIKKNNKLVNADPVKVVGNRTDASGLLDSLCSYNEMIA  
NSMNPFLVLDTTMTGLASETVKSFTAALGLPTISASFGQEGDLRQWRNIDENEKEYLVQIS  
PPADVPEIIRSLVLSKNVTNAAILFDDSFVMDHKYKSLQNVATRHHVIAPIKEADKIGDQL  
RQLRKLDIVNFFILGSFENIKRVLDAADSVGFFNRKFSWHAITQDKGELKCNCRNATITLA  
KPLIDAQYQDRLGLIKTSYQLNAEPEIAAAFYFDLALYSFLAVKEMIADGVWKRNNATNYI  
TCDDFDGKNTPRRAGLNLKKYFSKEVSETPTYGPISIVSNGYSFMEFTMQISAVGVRESSS  
DKSVPLGSKWAGYDNNLTLVDPQIMKNYTADVYRVVTVVEQKPFIIKDETAPKGYKGYCI  
DLIQRISEILNFDYEITPVGDQKFGNMDENGKWNQVRELMEKRADIGLGSMSVMAERE  
NVIDFTVPYYDLVGITILMKLPKTPSLFKFLTLENEVWLCILAAFFTSFLMWVFDKRS  
PYSYQNNREKYKDDEEKREFNLKECLWFCMTSLTPQGGGEAPKNLSGRLVAATWWLFGF  
IIIASYTANLAAFLTVSRLDTPIESLDDLSKQYKIYAPLNGSSTMTYFERMANIEAKFYEIW  
KDMSLNDLSEVERAKLAVWDYPVSDKYTKMWQAMKEAGLPNTLDEAVKRVKDSRSSS  
EGFAYLGDATDIRYLEITSCDLQMVGEEFSRKPYAIAVQQGSPLKDQFNAILQLNRRELE  
RLKEKWWSKNPEAKKCDKQEDQSDGISIQNIGGVFVIFVIGLACITLAFEYWWYKYRK  
GGKVVDVQAKHSDVATKINDGFHAKINKLYPRSRF

>TcasIR144

MQVSKILLSSLLLNRDETSKCLDAIFKQPVVVLGRVPKNLQNFDAWKPETYLILAPNATV  
LEQMLEKWSTRIESFNPRAKFWLLTHWHEIKPKTLTILAKFYIVNVAIVTRTGQVFTYYPYK  
YENIAQPDTKPVLLGQCDNVPSFPDKLPKFWRNNTTVQVLTCLLPYVDCSDLQDQLETQI  
FDLVQEFLKFKVRRIFDKSFKFLAKINGSYSASFRFLQEREVDMAMGSFRSVGSTQFRDF  
EFSTNHMEDKLVVVPKARPMVHVRLVKIFEPSFWGLLVVLTVMARVFEKMARFTD  
EPMGIYRKSGFRVAVLILIGSYLKKTPKRFEMRIIFWYFCMVLNIVFNSNLTNVFFGTFN  
TFQVNSFDDIISNLEMGLTDDVMHILSQEQNWPEITSTKVISSCAFGPACLNRTIFQRNLV  
CCWGERSIKFRMAKFYTTQVHYVDDHLLFFYLLFYFVKGYPIVPQISKMIVQLKSAGFVQ  
FIKSKVDKLEPRQGNELTTKILTILKRLEGPFYFLLVGVVGGIMIFGYEVVTYERKRRKKVR  
QEVTKILKKKKMRQNEKVKILEI

>TcasIR41a.1

TKMLFNNFCINILVNFIIINNYHKNSRCLLIFTDGDYKGEIPTVRIKATNGSFNSYLIFNYH  
GCQSVIIYTSNVTALLIKFETEIRLKMERFNERKFLIVPQNPSDFDKFFNLKQLYFISDLLLV  
LPTHNDTIFDLKTHKYVGVINDNEPVLDRWFSSQNSFLFGKNLYPNKLQNLGRPLKM  
ATFTYEPYSIIGNVFEQFFENDFILQKSVGEHHGSELMSAVQFALKYNMTPVPVINEKDY  
WGDIFPNWSGNLLGNLVDDKADVGFSAlyTWEFCYHFLELSKPLVRTGITCLVPAPKLS  
ERWLTPLFSYSSYLWFCIILTLVIAIFVLSLVLCYNHNKTLNLYPLKRKTTYIHFLES AVTI  
VLKPVFQQSLTLRELPIEIASKLLMGLVLLALFLTSSYGSLATVMTIPTYENAINTVEDFA  
NSGLDWGATQDAWIMSIQNAEEQRYVKIVSKFHPISEEELFQFSKSGKFGFSIERLPFEDYA  
IGDYIKEDVIDNFHLMKEDLYWEQCVMILRKNVLLPALDLFILKIFEAGLISHWQNEAVD  
LYMNPVKVQRAVKFYRQGEHTVVKLQWSHVKGPFALLLIGLCISFIIFILELTLKKRNQF

>TcasIR41a.2

TLGCLTMTNLNVLLQILLKTYFLNTRCIFLFTDSTIDLQVETPIVYFKVSNTLNP SLIFQHHG  
CQNILIHENASDIFVQFENLIRLNNERFNERYIVTGHNSLKILLTKQLEYVSDLLL VVPK  
QTGHYELITHVYRHQNRSKINEPVLLDVWYSQNH SFRQENDLFPNKL TNQNQRVLKIGTL  
SYEPYSVIGKLTVN XSPYYLNLGKDDYSFDGTETSLVYEFVHKYNLTPSFTIMGDDLWGD  
VYANWTGIGLFGSVLNDEIDIGYAAVYTWE EYYKFM DYTKLIRSGVTCLVPAPQLAAGW  
VTPLRSFSLGMWIALVIVLLSNTIVLNL LFYRNQKYHXNQLFQILLFNAFSKRFFIDSLTTAI  
KLYVQQPLTLTLKRGLLKYFIVTNMIMVLFISSYSSGLSSVMTVPRY GKSITQVKDLASSH  
LNWTGTTDAWIFSLRQVEEANYENIKNR FVVK TQNDLVTASKQYNFGFSVERLPYGHYA  
VGPYIQRDVICNYRIMQEDLYWGQCTFLLRKN SVLLPLLDK LILRVFEAGLEAYWENQVK  
CFGRKNMNL RDFLGCLPIHGHVCPKRHYVLYT TYXEHDTIKLTWEHV EGAFAVLVLGYA  
ASIFTFVIELILDK VRS

>TcasIR68a

MIKNLLPYKCVVLISDDIYGGTFTKSWYRRFGPFITFVIRVDEYEDLLSPFEETQA CLDTA  
KNEGCQMYLILLSNALQVSRLLRFGDKYRVINTRAKFVLLYDNRLFDKPLFYLWKRIINVI  
FIRRYSGQKSDTKKNMPWYEITTPFPPTQITSILIPRRLDIWTKSKFRKGIDLFRDKTSDLRN  
QTLKVAASHIPGTTKSLQEKTARTVIGNFSGTEVEILQTVSAAMNFHCELYEPVNV DVDL  
WGGKQSSGKYTGLVGEMVSTNADIALGDLYTPYILDMDLSIPYNTECLTFLTPESLTDN  
SWKTLILPFKYFRPAMWAAVLVCLLICGAVFHALARFHETISQNK SQVLEIHTKRKKIILSI  
CPEIEKLD SNLKYTKMREYKPPRFEGQSIGLYQFSEPFNSVLYTYSMLLLVSLPKLPTGWS  
LRMLTGWYWLYCLLLV VAYRASMTAILARPTPRVTIDTLQELVNSRLKCGGWGEINRQFF  
KSSLDPITKLIGENFELVND SNEAVDRVAQGVFAFYENSYYLKEALVKRQLRFQIARTTQN  
QSEREMRDIAREDRNLHIMTDCVIKMPISIGLQKN SPIKPRVDKYIRR VLEAGLIKKWLQD  
VMASILNAEVQSTQEEMKAIMNMKKFFGAI VALFIGYFISVVVLIVENVYFHFFV KRNP HY  
NKYTRSIIHHVKKAE

>TcasIR1001

MPRKLFLWIFFLLVSCYGNLSETHLQFLKRYFVSANSVAISMLQTHHQEVKIRDLAEVISR  
KLNSIGTPVVVHENHKSGLNIIMIVWSLKILRQFLDSLVPPEEKGTYYIIILEQDCATVHSD  
FAQILEQFWCEHNVLN VVVQNPCSGGTFYLF LFPFEHRDNFWG SCKSWDFNEQMPNKL RN  
LNQFPLKISFLYNPTLIAKLPKGLKTNPRYHNLSASKGYGGLDGFLRELVDYFNFDPVIV  
ENLEEYGRVLPNGTAFGSLGDVVNQRVHFSINSRFLMDYGTKEIEYTFPYISDEICMLVPKS  
LKVPTWKTLLKCFNTLSWVLIFVSCLCSTFAWYFVGPSKNLHKL IWQIYCFIVGIPQKIEPS  
FSQFVLLSFFFNV TIFGIIQGSYFTEFATTSFY PDIDTLEELYESNLPVATHFWFLLDGDS  
DLMTKLKTHKIEATGDCLEQTARQRNIATLGRKSESDLIIRTKYTSRDGTPLVHIVEECHTS  
LYLCGIVPKGSHFLAPFNQIITRLFEGGFTTKWYRDVFDGIISEEKPLDET VSFNSLNMND  
LQTAFHILTIGHLFSIMVLIGE VVIK GKHNK KLLT

>TcasIR100

KVTIIILIMMCLSLPKIQTCPKINHLKEHFKQVKSARIMILQNEIIVTDWLIMELIKDNKITV  
TVQKAIRNFEPFN TSNLTRFEALEFN D TIPTLQTDSTCGHLIIVKNEERLYQYLKSDPGFLIL  
NPRHFYAI VAMELFKTNV LREFWSLQVSNILL LDCDTSYTVLPFNGTTIRINAYTQRKLLR  
NFHNYFLQVSMQPKPPTAIVKFPKPLRENPIYKDLV PFKDYAGLDGCLLKVLTQRLNMKY  
VIVGNGQKYGTVLKNGTTTGT LAWIASNKVQISTNGRFLMTYGTNKLEFTVPYSSDQVC  
AVVPKALKIPKIIMLAKSLTPSSWFMIFLIYVICVLIY TLMGSTGSTWTLY AIFHGFPVKIVPT  
SRQSFFLTSCMLFSIIIMTIIEGSFFKTFTTTTTYYKDINTLEELDESELPIAETFFSFTNDKSRIM

TSLKRKKLVINRDDILEQVARKRNIAKLERKRDIKVRLKTEFLDEEGESRLHVVEECFTTF  
YIGFIVPKNSIFLPTFNNVIRRFESGLTQKWYGDVEFSIFLEKIFKLENNIKHHSFSFDNIVSA  
LCVLFIGLSLALLVFFWEVTKXKQITLIYVSLIYCIISRH

>TcasIR100j

LTLVQVVICLLEVSHYDNEKFVNVYQHFTLVRYLTLTFLNDGVHRIDLNNLVVDLMSRLN  
FSMMIKEKRLGKNSTTFQESDPFQGHIMVVYDVKVLLAFLEESTEVPKARGSFALFTSL  
KCPHETNHALKQLWTNHGTANLIAFCDNIIYVYHPFSKNDSTWGATLDYSPATETPNLF  
RNFNGYLLRVSLFKRPPTALKQVPSYISNNPIYRDLKPGDFAGLDGTLLRFLSNYLNFTVVI  
DESHPTHGRVLKNGTITGSLSDVVSHRVDFSANDWFLIDYQTPEIEPTVPFSYDQVCPVVS  
KALKVPQWKAFFIFDLTSWVLIFFMWLCCVFWVHVLNPFRLDSTIWEICSVLFGNPVNV  
VPLSNQHMFLGSCMVLNIIIMGIIQGSVFTDFTTTTFHKDINTLEELDEAGLKIASSAWYLD  
FDTDLIKRLKTKQIRNYIGSYKDTAFKRGMAVLGRKQDVEHMKVEFVAEDGSPLLHVT  
SECLQTFLLVSLFPKGSFPFLPTFNNVITRLEAGLTVKWKYQDVTSTGTMLQQMKNFANRRP  
TGLFSLNDAKLAFYALFVGYIASFVTFLEILTKNHHNNVHNHVDVLKAQHGGQVQVDQ

>TcasIR100n

DTFWIVYQTHFLLDYTLHILETEDHKFELRQFTQNILKRVNKYGYFLSVRITKSSLNKRN  
KSYHFPSTAYAPSQNLAKLSDDQEFYKAKRLSTDSKHGFALIVWDLTTLHLFLDQDYRTIV  
PEGRGTYAIQVVSQKCDVKNEIAFTLQRLWTEYQVINVVAQTPCSCDKTHIFIYHPFVKRE  
GFWGLATSHTLQIKGDSRLISNTLSDFNGFPLRISIFPRTPTAMQTLPKLLHYNPIYRNLTW  
SKGFAGLDGLVLATLAEYFNFEVVLVGSLEDDFGKVLPNGTTVGSADITERAVYNAN  
ERLVAYFNLDQIDFTVPYTREDICLVPKAAKIPKWKILFQSLDPQSWCFTLFAYVSCFMF  
WYNIGPSRSLPKVSWQMFSFFLGIPTKSFARKLDQVFLIPCMIFSVMVGVVQGSFFTKL  
TLFSFYQDVNTLEEMADLELPIGAFIWNLIRDDSDVIRRLKSKSVKPPDNIFDMIAAHRNIA  
TIETRARAQLLIGSKYVDDDGFPLLHIVNECLTTFNLNANIVPKGSALLTVFNAVGLKLFESG  
LTRKWNNDVVDSLIAEKMISVNRKRVRTKSFSLYDAQGAFFVILVGYACSVFVFLCEIVLK  
XDKICYLALIINKT

>TcasIR100e

DDFWRVTKNHFLVNSLTIQVLQTEEHQYDLNQYTVTLLKRLNSLNLVVALRMQEKFLSG  
RNFPKHSVTNHTFSTTKPKFDPIGGEELTQLKRLSSDSSKGYFIVIWDVESLHNFLDEDFQV  
VPEARAXYMIHFAFTYSTEACKIVKLQVSSVLRWLWIDNNVFNIIAQTSCLCDLEVYVHR  
PFVVRGGFWGLTNSYQMSEIVENPRIANPLINFNQFPLKIGIFPRPPTVIETLPKLLTDSPIY  
KNLSFSKGFAGVDGLVLGTLAECLNFDTTVITSKPNSYGYIYKNGTATGAIADVIDRRMVF  
SANSRFLLIYNTDQLEFTVPYTAEKMCLAVPKALKVYKWSSMFRFCFNKLTWVSIICSGIC  
TIFWYLLKWQKLVTAALATIAQFLLGVPANVRPNVPQMLFLNSCMGFNIVIMGIIQGFLFQS  
FTTTSFYPDINTIEEMVDSSELPLRSSIFYFLRIDNSSLIHKLKSRTMAAPPNVYDLVAFHRNIA  
TTDIKSHVDFMVRSLYLDDEDGWPLIHTVDECDEFETFLIANIVPKGS AFLTVFNNVITKLLEGG  
LTQKWYEDVINSLILENWINLNRNKS KTHAFSLYDLQVAFYVIIMGCAVAILVFAEIVHKR  
RXNXXCCNNHHKNIIFAA

>TcasIR100f

DDFWVIFSTHFLATSLTFITVQTNSKQYDLRLLAQAIISMDKDQVMTTRHVILHNYAEN  
INFNVVFKTGTKKNARDFVTDLLAKTKKLASDSREGFVIITWNVNVLQKFLAQHISEINPR  
TRATYLFILISSDSLKIKHCLHFLWHKYDILNIVVHVLGCGTTTTLIYRPFCKTKNSWGEI  
TAHQIEEIVQQPLLLTNSLQDLNQYPLQVSLFARDPTALTQLPKLLQNNPIYKNLASFYGLD  
GSMLSTMAKILNFEVVIVENHDRLPFGRVWPNGTASGTLGDVVNRRVALSSNSRILADYN

TQEIEFTVAYNGDSICVAVPKSLKVPKWRVLFECFDAASWLLTSLVFIVCLCFWYCVALKN  
FARILWDVYSFLMGIPTRIVPSRQYFFLSSCMVFNVIILQLLQGWLFATAFTKTVFYPDLDTL  
EVLEKTNLPVATNMWFLFKDNSEVIQKLSRIGKTPNSLDLVAYSARNICVLDKRQDLELY  
SQAQFVGPDGLSLLHIVNQCLTSVLLVNIIVPKGSPFLPVFNDIMSRLFESGFTKKWYSDVV  
TSRVTEKMVSLGRKERNFSFKIKDLQAAFYVMMAGCVFSLFVFGELVTHXVFVMNKSS  
QSKSHRFLLCNYGV

>TcasIR100g

TLFKIAEVTFFMVTMHEEFLLSLLFGNYHTNLYQTVKIQEKFARTNNKTGAWYENVALDQ  
KLDPPIDQNWQRVKLRSDSFEFGFIIIVWDPQTLQFLNQNFSLVVPARATYFLLFVFSIY  
ENCKLVNHILKRFWSEFVNLNIIAQTPYCCNKVYIHRPFVKTTSWGWVTSYTLTEVTQNL  
ALITNPLLDLNQFPLRIALFEKNPTAIRKLPKALQNNPIYRNLSRSKGFAGSDGFLLSAMVE  
YLNFDPLIDETLEPMNFGHVLPNGTVCVLAEVVHKRTDYAGNCRMLTYFGTDGYEFTA  
PYSSEKIAMVVPKAGKVPRWRSFNCFNALSWSLIFSIAIVSTVFWCFLRRSQHLKRASWE  
MFAHFVGPICRVVPSRGQFMFLTACMMFNIIILGHIQGSFFDFTTTSYYPDLNLTLEQVLDN  
LPIMAFAWRLLRTNSSPILQKLEQRSIPYEDNVYELVALYRNVAALDRRLDLELEIKTKYSG  
RDGVSPLHIVDES�VTFLLTSLVPKGSFPLVFNHVIRSMFEAGLTAKWYDDVVTSLIIEHK  
HKTPSFGVKYRPFTLQDVQAAFYVIAFGYSCSVFVFWCEIIVKFSGKIKHFHYFVLI

>DmelCG3822

MRSSGVLVPLLLLLQLILNCRKAQSLPDIKIGGLFHPADDHQELAFRQAVDRINADRSIPRS  
KLVAQIERISPFDSFHAGKRVCGLLNIGVAAIFGPQSSHTASHVQSICDNMEIPHLENRWDY  
RLRRESCLVNLYPHPNTLSKAYVDIVRHGWKFTTIIYENNDGIVRLQELLKAHGMPFPI  
TVRQLSDSGDYRPLLKQIKNSAEAHIVLDCSTERIHEVLKQAQQIGMMSDYHSYLVTSLD  
LHTVNLDEFYGGTNTGFRLINEKIVSDVVRQWSIDEKGLLRSANLTTVRSETALMYDAV  
HLFAKALHDLDTSQQIDIHPISCDGQSTWQHGFSLINMKIVEMKGLTNVIKFDHQGFRTD  
FMLDIVELTPAGIRKIGTWNSTLPDGINFTRTFSQKQEQEIEANLKNKTLVVTILSNPYCMR  
KESAIPLSGNDQFEGYAVDLIHEISKSLGFNYKIQLVPDGSYGSNLKLTGEWNGMIRELLEQ  
RADLAIADLTITFEREQAVDFTTPFMNLGVSILYRKPIKQPPNLSFSLPSLDVWIYMATAY  
LGVSVLLFILAKFTPYEWPAYTDAHGEKVESQFTLLNCMWFAIGSLMQQGCDFLPKALST  
RMVAGIWWFFTLMISSYTANLAAFLTVERMDSPIESAEDLAKQTRIKYGALKGGSTAAFF  
RDSKISTYQRMWSFMESARPSVFTASNGEGVERVAKGKGSYAFLMESTSIEYVTERNCELT  
QVGGMLDTKSYGIATPPNSPYRTAINSVILKLQEEGKLHILKTKWWKEKRGGGKCRVETS  
KSSAANELGLANVGGVFVLMGGMGVACVIAVCEFWKSRKVAVEERLSAILNE

>DmelCG5621

MISTEASFPLGFILTSLLLAFPGCRGERTNVGLVYENTDPDLEKIFHLAISKANEENEDLQLH  
GVSVSIEPGNSFETSKKLCMLRQNLVAVFGPTSNLAARHAMSICDAKELPFLDTRWDFG  
AQLPTINLHPHPATLGVALRDMVVALGWESFTIYESGEYLPTVRELLQMYGTAGPTVTVR  
RYELDLNGNYRNVLRIRNADDFSFVVVGSMTLPEFFKQAQQVGLVTSYRYIIGNLDW  
HTMDLEPYQHAGTNTGLRLVSPDSEQVQEVAKALYEESEPFQNVSCPLTNSMALVYDGV  
QLLAETYKHVNFRPVALSCNDDSAWDKGYTLVNYMKSLLTNGLTGPIRFDYEGLRTDFKL  
EVIELAVSGMQKIGQWSGEDGFQENRPAPAHSLPDMRSLVNKSFVVITAISEPYGMLKET  
SEKLEGNDQFEGFGIELIDELSKKLGFSYTWRLQEDNKYGGIDPKTGEWNGMLREIIDSRA  
DMGITDLTMTSERESGVDFITPFMSLIGILFRKPMKEPPKLSFMSPFSGEVWLWLGLAY  
MGVSISMFVLGRLSPAEDWNPYPCIEEPTLENQFSFANCLWFSIGALLQQGSELAPKAYS



VSDPLEKDDYNWLDMVHWSNFLAYAPPLPHIQDQFQSPVPGLTFAVNISAGYYSSEHEAK  
TDLAAWSSVGEMRLLNETISPARRFFRIGTAESIPWSYLREEGTGELIRDRSGLPIWEGYCI  
DFIIRLSQKLNFEFEIVAPEVGHMGELNELGEWDGTVVGDVLRGETDFAIAALKMYSEREEV  
IDFLPPYYEQTGISIAIRKPVRRSLSLKFMTVLRLEVWLSIVAALVGTAIMIWFMDKYSPYSS  
RNNRQAYPYACREFTLRESFWFALTSFTPQGGGEAPKAISGRMLVAAYWLFVVLMLATFT  
ANLAAFLTVERMQTPVQSLEQLARQSRINYTVVKDSDTHQYFVNMKFAEDTLYRMWKE  
LALNASKDFKKFRIWDYPIKEQYGHILLAINSSQPVADAKEGFANVDAHENADYAFIHDSA  
EIKYEITRNCNLTEVGEVFAEQPYAVAVQQGSHLGDELSYAILELQKDRFFEELKAKYWNQ  
SNLPNCPLSEDQEGITLES LGGVFIATLFGVLAMMTLGMEVLYYKKKQNALEITQVRPVN  
DSSGSGGNSSTAPPTATSTTKQAWHIPVLEAEEKPAKVSPPPSFETATFRGKKLPARITLGDG  
KFKPRHGLYARRNLGASDSHSGYME

>DmelIR25a

MILMNPKTSKILWLLGFLSLLSSFSLEIAAQTTQNINVLFINEVDNEPAAKAVEVVLTLYLKK  
NIRYGLSVQLDSIEANKSDAKVLEAICNKYATSIEKKQTPHLILDTTKSGIASETVKSFTQA  
LGLPTISASYGQQGDLRQWRDLDEAKQKYLLQVMPADIPEAIRSIVIHMNITNAAILYDD  
SFVMDHKYKSLQNIQTRHVITAIKDGKREEREEQIEKLRNLDINFFILGTLQSIRMVLES  
VKPAYFERNFAWHAITQNEGEISSQRDNATIMFMKPMAYTQYRDRLGLLRTTYNLNEEPQ  
LSSAFYFDLALRSFLTIKEMLQSGAWPKDMEYLCDDFQGGNTPQRNLDLRDYFTKITEP  
TSYGTDFLVTQSTQPFNGHSFMKFEMDINVLQIRGGSSVNSKSKWISGLNSELIVKDEE  
QMKNLTADTVYRIFTVVQAPFIMRDETAPKGYKGYCIDLINEIAAIVHFDYTIQEVEDGKF  
GNMDENGQWNGIVKKLMDKQADIGLGSMSVMAEREIVIDFTVPYYDLVGITIMMQRPSS  
PSSLFKFLTLETNVWLCILAAFFTSFLMWIFDRWSPYSYQNNREKYKDDEEKREFNLKE  
CLWFCMTSLTPQGGGEAPKNLSGRLVAATWWLFGFIIIASYTANLAAFLTVSRLDTPVESL  
DDLAKQYKILYAPLNGSSAMTYFERMSNIEQMFYEIWKDLSLNDSLTAVERS KLAVWDYP  
VSDKYTKMWQAMQEAKLPATLDEAVARVRNSTAATGFAFLGDATDIRYLQLTNCDLQVV  
GEEFSRKPYAIAVQQGSHLKDQFNAILTLLNKRQLEKLEKWWKNDEALAKCDKPEDQ  
SDGISIQNIGGVFIVFVIGMACITLVFEYWWYRYRKNPRIIDVAEANAERSNAADHPGKL  
VDGVILGHSGEKFEKSKAALRPRFNQYPATFKPRF

>DmelIR21a

MSYYWVALVLFQAQAFSIEGDRSASYQEKCISRRLINHYQLNKEIFGVGMCDGNNENEFR  
QKRRIVPTFQGNPRPRGELLASKFHVNSYNFEQTNSLVGLVNKIAQEYLNKCPPVIYYDSF  
VEKSDGLILENLFKTIPTIFHGEINADYEAKNKRFTSHIDCNCKSYILFLSDPLMTRKILGP  
QTESRVVLVSRSTQWRDLDFLSSSELSSNIVNLLVIGESLMADPMRERPYVLYTHKLYADGL  
GSNTPVVLTSWIKGALS RPHINLFPSKFQFGFAGHRFQISAANQPPFIFRIRTL DSSGMGQLR  
WDGVEFRLLTMISKRLNFSIDITETPTRSNTRGVVDTIQEQUIERTVDIGMSGIYITQERLMD  
SAMS VGHSPDCAAFITLASKALPKYRAIMGPFQWPVVALICVYLGIFIVFTDRLTSLH  
LMGNWGEVENMFWYVFGMFTNAFSFTGKYSWSNTRKNSTRLLIGAYWLFTHIITSCYTGS  
IIAFVTLPAFPD TVDSVLDLLGLFFRVGTLNNGGWETWFQNSTHIPTSRLYKKMEFVGSVD  
EGIGNVTQSFFWNYAFLGSKAQLEYLVQSNFSDENISRRSALHLSEECFALFQIGFLFPRES  
VYKIKIDSMILLAQQSGLIAKINNEVSWVMQRSSSGRLLQASSNSLREIIQEERQLTTADT  
EGMFLLMALGYFLGATALVSEIVGGITNKRQIIKRSRKSAASSWSSASSGSMRLRTNAEQL  
SHDKRKANRREAAEVAQKMSFGMRELNLTRATLREIYGSYGAPETDHGQLDIVHTEFPNS  
SAKLNNIEDEESREALESLQRLDEFMDQMDNDGNPSSHTFRIDN

>DmelIR31a

MNLLISMFILILAAGEGEIIPSMEE SVVTNFVKS LSVKTKQAIVFSCLFKDFKEISLALMRINQ  
FVSVVNLNQSYSLTSILTREN YARTSVMVNARCSGSSELLFEASENRYFNKTYQWFLWGV  
DLEVQSLFPLNLNYVGPNAQITYVNETADGYAYWDIHSKGRHLKSNLEINLIATLINDTLNI  
ARDIFHLQSIDFRGQFNGLTLRGASVIDKEDIISNEQIESILSRPTKDAGVAAFIKYHYELLG  
LLRERFNFTVNFNRNRGWAGRLGNTTFRLGLLGIVMRNEADIAASGAFNRINRFAEFDTIH  
QSWKFETAFLYRYTSDLDTHGKSGNFLSPFSDRVWLFCLLTLGAFSIIWVLFEEIDYKILRIR  
VNSQKLEHLNQQSSVICIKTTCIERILQTFGACCQQGLDPNPVDRSVRFLVMTLFLFLSLVM  
YNYYTSSVVGGLSSSDQGPSTVDEITASPLKISFEDIGYYKVLFRSQNRSITRLIEKKLSS  
SRSLNELPIFSHIEDAVPYLKAGGFAFHCEVVDAYPWISEYFDANEICDLREVSGLMEVEIL  
NWILHKNSQYTEIFKTAMCNAQEKG FVERILRRRQIKKPACQSLYTVYPVSLSGVLPGFVI  
LICKSINKFS

>DmelIR40a

MHKFLALGLLPYLLGLLNSTRLTFIGNDES DTAIALTQIVRGLQSSLAIALPSLALS DGV  
CQKERNVYLDDFLQRLHRSNYKSVVFSQTE LFFQHIEENLQGANECISLILDEPNQLLNSL  
HDRHLGHRLSLFIFYWGARWPPSSRVIRFREPLRVVVVTRPRKKA FRIYYNQARPCSDSQL  
QLVNWYDGDNLGLQRIPLPTALS VYANFKGRTFRVPVFHSPWFVWV TYCNNSFEED EEF  
NSLDSIEKRKVRVTGGRDHRLMLLSKHMNFRFKYIEAPGRTQGS MRSEDGKDSNDSFTG  
GIGLLQSGQQADFFLGDVGLSWERRKAIEFSFFTLADSGAFATHAPRRLNEALAIMRPFKQ  
DIWPHLILTIIFSGPIFYGIIALPYIWRRRWANS DVEHLGELYIHMTYLKEITPRLLKLPRTV  
LSAHQMPHQLFQKCIWFTLRLFLKQSCNELHNGYRAKFLTIVYWIAATYVLADVYSAQLT  
SQFARPAREPPINTLQRLQAAMIHDGYRLYVEKESSSLEMLENGTE LFRQLYALMRQQVIN  
DPQGGFFIDSVEAGIKLIAEGGEDKAVLGGRETLFFNVQQYGSNNFQLSQKLYTRYSAVAVQI  
GCPFLGSLNNVLMQLFESGILDKMTAAEYAKQYQEVEATRIYKGSVQAKNSEAYSRTESY  
DSTVISPLNLRMLQGAFIALGVGSLAAAALNNTINVRSLNSRDKFICGGPVKIWYYLVLLL  
WYYFNRGLVGIYQLWHKTSIRNTGKGMPFLGE

>DmelIR64a

MHWWLLVFLPLSCQGLPEHELLELELDYGLAEPQRTSLLQSS LILQFSQDYKHIPRITYFTC  
QKPHLQTPNQIPNAAEHRDAFAAKNFQLIKSLYESELFVRIVLLD VLAQSPTSGRPNRPGN  
GPTGGFSQTPSQAQSNSEWLEGVLRMEALRQIAVVDLACGAVSRRFLE LASAKMLYSEKF  
HWLLIEDFAWHGRTQTAEGSGKRDDGEMEEEEPPGQQIQATDDEDLPSIESFLGGMNLYM  
NTELTAKRMSEAAHYTLFDVWNPGLNYGGHVNLTEIGSFTPT EGIQLHTWFRTTSTVRR  
RMDMQHARVRCMVVV TNKNMTGTLMYLTHTMSGHIDTMNRFN FNLLMAVRDMFNW  
TFVLSRTTSWGYVKNGRFDGMIGALIRNETDIGGAPIFYWLERHKWIDVAGRSWSSRPCFI  
FRHPRSTQKDRIVFLQPFTNDVWILIVGCGVLT VFILWFLTTIEWKLVPHDGSALIKPKGGA  
PPRHYYQQQQQEQVEAPVRPITAVSVVVSKEKVEEKQEEYEDSTPIDAGTLWQRCYQKL  
NKYIKDRKAKQKKAPERVGLFLESVLFVVGII CQQGLGFSTSFVSGRCIVITSLLSFCIYQF  
YSASIVGTLLEKPKTIKTLSDLVHSSLKVGME DILYNRDYFLHTKDPVSMELYAKKITSV  
PTTKENEADEDEPVDPNPVSTDPAKSYRDI VHSSETGAHAKDNAASNWLDPETGLLRVK  
HERFAFHVDVAAAYKIIAETFSEQDICDLTEVSMFPPQKT VSIMQKNSPMRKVISYGLRRVT  
ETGILTYHFNVWHSRKPCCVKKIETS DLHVDMDTVSSALLIL LFSYAITLMILGTEILYSKW  
HNRIQLKWVGAT

>DmelIR75a

MQLVQLANFVLDNLVQSRIGFIVLFHCWQSDES LKFAQQFMKPIHPILVYHQFVQMRGVL



NWSHLELSYMGHTQPTLAIYVDIKCDQTQDLLEEASREQIYNQHYPHWLLVGNQSKLEFY  
DLFGLFNISIDADVSYVKEQIQDNNDVAVYVHDVYNNGKIIGGQLNVTGHEMSCDPFVC  
RRTRHSSLQKRSKYGNREQLTDVVLVAVTVVTQRPLTSDDELIRFLSQENDTHIDSLARF  
GFHLTLILRDLLHCKMKFIFSDSWSKSDVVGGSVGAVVDQTADLTATPSLATEGRLKYL  
SAIETGFFRSVCIFRTPHNAGLRGDVFLQPFSPVWYLFGGVLSLIGVLLWITFYMECKRMQK  
RWRLDYLPSSLSTFLISFGAACIQSSSLIPRSAGGRLIYFALFLISFIMYNYTTSVVVSSLLSS  
PVKSKIKTMRQLAESSLTVGLEPLPFTKSYLNYSRLPEIHLFIKRIKIESQTQNPWLPAEQG  
VLRVRDNPVYVYVFETSSGYAYVERYFTAQEICDLNEVLFREQLFYTHLHRNSTYKELFR  
LRFLRILETG VYRKQRSYVWHMKLHCVAQNFVITVGM EYVAPLLMLICADILVVILLV  
ELAWKRFFTRHLTFHP

>DmelIR75b

MNFSVLESHFKEAQIFVDADVTVTHDPFSKNFLLYDVYNKGRQLGGELNITADREIFCN  
KTNCRVERYLSELYTRSALQHRKSFTGLTMRATAVV TALPLNVSIKEIFDFMNSKYRIQLDT  
YARLGYQARQPLRDM LDKFKYIFRDRWSDGNATGGMIGDLILDKADLAIAPFIYSFDRA  
LFLQPITKFSVFREICMFRNPRSVSAGLSATEFLQPFSGGVWLT FALLLLLAGCLLWVTF  
FILERRKQWKPSLLTSCLLSFGAGCIQGAWLTPRSMGGRMAFFALMVTSYLMYNYTTSIVVSK  
LLGQPIKSNIRTLQQLADSNLDVGIPTVYTRIYVETSEEPDVRDLYRKKVLGSKRSPDKIW  
IPTEAGVLSVRDQEGFVYITGVATGYEFVRKHFLAHQICELNEIPLRDASHTHTVLAKRSPY  
AELIKLSELRMLETG VHFHHERSWMETKLHCYQHNHTVAVGLEYAAPLFIILLGAILCMG  
ILGLEVIWHRHCTLH

>DmelIR75c

MTSWPLYRLIVFNLEINLSNLMVFHCWSIKEAFPLVEMLNQNGIFSQYIDVQNPDLANV  
HKEYLDSDLVSLNADVTVYSREDEERFILHDVYNKGSHLGGKLNITVDQTLQCNRSHCQ  
VKEYLSELHLRPLRQHRMDLSSVTFRLAALVSVLPINSSEEELLEFLNSDRDSDHMD  
SISRIGNRLIMHTQEILGFNVQDAFGGAIGMLTNESAELCTTPFVPSWNRLHYLHPMTEQAQFRAV  
CMFRTPHNAGIKAAVFLPEFMPVWFVAFAGLLIFAGVLLWMIFHLERHWMQRCLDFIP  
SLLSSCLISFGAACIQGSYLMPKSAGGRLAFIAMLTSFLMYNYTTSIVVSTLLGSPVRSNIR  
TIQQLADSSLDVGFDTVPFTKTYLVSSPRDIRSLYKQKVESKRDPNSVWLSPEEGVIRV  
RDQPGFVYTSEASFM YHFVEKHYPREISDLNEIILRPESAVYGMVHLNSTYRQLL  
TQLQVRMLETGITSKQSRFFSKTKLHTFSNSFVIQVGM EYAAPLFI SLLVAYFLALLIL  
ILEICWARYAKKKFSTIIPQNQ

>DmelIR75d

MKVQVAHWLPLIFFLLVSGTTPRVAGSWRSEYSRQDPDPKTRWGNQLPDM LVAYYRHHGV  
HSLMLVVCHTDIADFRLWKLWQHFNLN NFYVQVSTESSLRDLQHVDALDEHKDAPPPKS  
FHANNSTHWETSFLLPALPYKMGILLLEFSSECALNLLRWSAASEHNYFTTNRFWLL  
LTTEDPGDIDLLEDPEIFIPDSELRVLHYENVGNFSCSLIDLYKVA AWKPLKRTL  
VGHNIRNSRHVIHALQHFGSAITYRQDLEGIVFNSAIVIAFPDLFTNIEDLSLRHIDTIS  
KVNHRMLLELANRNLNMSYNTYQTVNYGWRQPNGSFDGLMGRFQRYELDLAQLAIFMRL  
DRIALVDFVAETYRV RAGIMFRQPPLSAVANIFAMPFENDVWVSILMLLIITTVVLV  
LELFFSPHNHDMSYMDTLNFVWGAMCQQGFYVEVRNRSARIIVFTTFVAALFLFTSFSAN  
IVALLQSPSDAIQSLSDLGQS PLEIGVQDTQYNKIYFTESTDPVTKNLYHKKIASKG  
ENIYMRPLLGM EKMR TGLFAYQVELQAGYQIVSDTFSEPEKCGLMELEPFQLPMLAIP  
TRKNFPYKELIRRQLRWQREVS LVNREERKWIPQPKCEGGVGGFVSIGITECRYALGIFG  
CGAAVSFVLFLEFIFRHFQVYRIIKGY

REVQR

>DmelIR76a

MENLLVESYYFSTVLSFFAQQFFADSHATCIFWHPAFDFRLETVHPMPLIIMDWHRWANRS  
DQDVYDYKIKEDEFEGKGIPYNDWTLRLTVAIERSHCETFIAFQEIQIPEFARYFYHASIYSI  
WRSLRNRFMFVYTKEFEDKKDSYLSGYIFQDQPNILVITSQYLNSSTFEIKTNRFVGPARNFN  
KNPEPVEFYILQRFDAKGTKATWETQSAMSSKMRNLKGREVVIGIFDYKPFMLLDYEKPP  
LYYDRFMNTTVDVTIDGTDIQLMLIFCELYNCTIQVDTSEPYDWGDIYLNASGYGLVGMILD  
RRNDYGVGGMYLWYEAYEYMDMTHFLGRSGVTCLVPAPNRLISWTLLLRPFQFVLWMC  
VMLCLLLESALGITRRWEHSSVAAGNSWISSLRFGCISTLKLNVNSTNYVTSSYALRTVL  
VASYMIDIILTTVYSGGLAAILTLPTLEEAADSRQRLFDHKLITWTGTSQAWITTIDERSADPV  
LLGLMEHYRVYDANLISAFSHTEQMGFVVERLQFGHLGNTIELIENDALKRLKLMVDDIYF  
AFTVAFVPRLWPHLNAYNDFILAWHSSGFDKFWKIAAEYMNAHRQNRIVASEKTNLDI  
GPVKLGIDNFIGLILLWCFGMICSLTFLGELWRGQG

>DmelIR76b

MATGIELLVAAALCVACPLNDSPTNLIQMGENGTLSPVTELPMDVDASEAGFDADAPV  
ETLETINRKKPKLREMLDWIGGKHLRIATLEDFPLSYTEVLENGTRVGHGVSFQIIDFLKKK  
FNFTYEYVVPQDNIIGSPSDFDRSLIEMVNSSTVDLAAAFIPSLSDQRSFVYYSTTTLDEGE  
WIMVMQRPRESASGSGLLAPFEFVWVILILVSLAVGPIIYALIIILRNRLTG DGQQTPYSLG  
HCAWFVYGALMKQGSTLSPIADSTRLLFATWWIFITILTSFYTANLTAFLTLKFTLPYNTV  
NDILTKNKHVSMRGGGVEYAIRTTNESLSMLNRMIQNNYAVFSDETNDTYNLQNYVEKN  
GYVFVRDRPAINIMLYRDYLYRKTVSFSDEKVHCPFAMAKEPFLKKKRTFAYPIGSNLSQL  
FDPELLHLVESGIVKHLKRNLP SAEICPQDLGGTERQLRNGDLMMTYYIMLAGFATALAV  
FSTELMFRYVNSRQEANKWARHGIGRTPNGQSVAPSRWLRGWRRRLNSGHGQLLGASTHG  
QNVTPPPPYQSIFNGGSHGDPLNRWRRPLANGNALGNGVLLGGDSEGGVRRLLINGRDYM  
VFRNPNGQSQLVPVRSPSAALFQYSYTE

>DmelIR84a

MIKLQVKVISWPLIILTAFLRVLQIESINTNFLELAAAFEDFLRSEHLSHVLVVRGDDADGDW  
KIECHQKLLANYRVQFYRPEMSANFEDLMFYGSPRTAVLVLNSEHVLVRRQVFGVASEAG  
YFNNSLAWFILGSGRESLPVEQLIDQLLSGYRMGIDADITVALRGPDNASMLFYDVYRISR  
QANTPLIIEKKGLWTHSGGYQKFGNFKNWVIRRRNFLNVTLIGSTVLTEKPPFGDMEY  
LADDKQLQLDPMQRKTYQLFQLVERMFNLSLAISLTDKWGELLNNGSWSGVMGQVTS  
READFAVCPIRFVLD RQPYVQYSAVLHTQNIHFLFRHPRRSHIKNIFFEPLSNQVWWCVLA  
LVTGSTILLFHVRLERMLSNMENRFSFVWFTMLETYLQQGPANEIFRLFSTRLLISLSCIFS  
FMLMQFYGAFIVGSLLSESARSIVNLQALYDSNLAIGMENISYNFPIFTNTSNQLVRDVYV  
KKICKSGEHNIMSLQQAERIIQGRFAFHTAIDRMYRLLELQMDEAEFCDLQEVMFNLP  
YDSGSVMPKGS PWREHLAHALLHFRATGLLQYNDKKWMVRRPDCSLFKTSQAEVDLEH  
FAPALFALAMVASALVFLLELFLHWLPDFRRRLGTMST

>DmelIR92a

MLLQPLVMHLSQLLRIVGQYFAEFPSILIVYNNASSTTPLQLEYLSALELVLRELSKPIRLQ  
WINVAFLKDLNDLEDQVMGALNSSVTEGFITILSQTHHFIHARYYATRANANVRLKDKRYL  
FLCEDESPAELLCMDILQFYPHLMVRPGTETAPTGTGPHPDPRRGGGASVSTKNKDDG  
EGGAGNKTTSPYRDINFELWTQKFVGVGNLDALLDAFLPNETFANRVELYPNKLLNLQ  
RRSLLVGSITYVPYTITNYVPAGQGDVDPIHPQWPNRSLTFDGAEANVMKTFQVHNLCHL  
RVEAYGADNWGGIYDNESSDGMLGDIYEQRVEMAIGCIYNWYDGITETSHTIARSSVTIL

GPAPAPLPSWRTNIMPFNNRAWLVLISTLVICGTFLYFMKYVSYRLRYSQTQVKFHHSRKL  
EKSMULDIFALFIQPSAPLSFDRFAPRFFLATILCATITLENIYSGQLKSMLTFPFYSAPVDTIE  
KWAQSGWKWSAPSIIWVHTVQSSDLETEQILARNFEVHDYSYLSNVSFMPNYGFGIERLS  
SGSLVGDYVSTEALENRIVLHDDLYFDYTRAVSIRGWILMPELNKHIRTQETGLYFHWE  
LEFIDKYMDKKKQEVLMDLANGHKVKGAPQALDVRNIAGALFVLAFGVAFAGCALVAE  
LLIHRMDLSK

>DmelIR93a

MNPGEMRPSACLLLLAGLQLSILVPTTEANDFSSFLSANASLAVVVDHEYMTVHGENILAH  
FEKILSDVIRENLRNGGINVKYFSWNAVRLKKDFLAAITVTDCEWTFYKNTQETSILLI  
AITSDCPRLPLNRALMTVECRINAVFVDQTTILEENALLVKSIVHESITNHITPISLILYEIN  
DSLRGQQKRVALRQALSQFAPKKHEEMRQQFLVISAFHEDIIEIAETLNMFMHVGNGQWMIFV  
LDMVARDFDAGTVTINLDEGANIAFALNETDPNCQDSLNTISEISLALVNAISKITVEEESI  
YGEISDEEWEAIRFTKQEKQAEILEYMKFLKTNACKSSCARWRVETAITWGKSQENRKF  
RSTPQRDAKRNRFEFINIGYWTPVLGFVCQELAFPHIEHHFRNITMDILTVHNPPWQILT  
SNGVIVEHKGIVMEIVKELSRALNFSYYLHEASAWKEEDSLSTSAGGNESDELVGSMTFRI  
PYRVVEMVQGNQFFIAAVAATVEDPDQKPFNYTQPISVQKYSFITRKPDEVSRILYFTAPFT  
VETWFCMLMGIILLTAPTLYAINRLAPLKEMRIVGLSTVKSCFWYIFGALLQQGGMYLPTAD  
SGRLVVGFWWVIVVIVLVTTYCGNLVAFLTFPKFQPGVDYLNQLEDHKDQYGLRNGTFF  
ERYVQSTTREDFKHYLERAKIYGSAQEEDIEAVKRGERINIDWRINLQLIVQRHFEREKEC  
HFALGRESFVDEQIAMIVPAQSAYLHLVNRHIKSMFRMGFIERWHQMNLPASAGKCNKSA  
QRQVTNHKVNMDDMQGCFLVLLGFTLALLIVCGEFWYRRFRASRKRQFTN

>DmelIR7a

MFHHLWLLMGLRSLAMGALHPPQPEAMTPLVAAALEILAEQVSPSQSTLAVMDLTQDAE  
HRDERQEQLMTHILRSVGESEALRTFQKPPAEVPASFVFLVNSAQAFNTLGFHFTDIHSTR  
EFNFLILLTHRMSSRAERLQVLRDISRTCVRFHSTNVILLTEKRDGVVVLVYAYRLLNMDCD  
LSVNLELIDIYKNGLFRHGHEARSFNRLVLSGCPLQVSWYPLPPFVFIGNSSDPEERAQI  
WRLTGIDGELIKLLASIFDFRILLEPCNKCLSPDIKDDDCSGCFDQVIISNSSILIGAMSGSHQ  
HRSHFSFTSSYHQSSLVFIMHMSSQFGAVAQLAVPFTVIVWLALVSSLLLVLVLRVYQGLFDSFR  
LPYHKPLPTEISELIRSNYTLINQEYLDYYPRELTVLTRNGSKDRFDYIQGLGKEGKFTTSL  
IATMEYYNMMHWSTSRLTHIKEHIFLYQMVIYLRHSLKFAFDRKIKQLLSAGIIGYFVRE  
FDACQYRKPFEEDYEVTPIPLDSFCGLYYISLIWLSAAVVAFILELLSQRIVWLRRIFE

>DmelIR7b

MKYWLYILSCCSLVA STMESSDWDLAEALAQVVANSEMGRFKTLYIYTHNTSQSTGGHL  
EELLDQVLMIVPNNLQARRLLLQQSMEYKPYVHAVLALVDGLPSSAIYARIRATQDLSHT  
LIYMSMPTDAYGEEMQATLRFWRVLSVLNVGVVLRPPGDHILMVSYFPFSALHGCQVISA  
NVVNRYQVGTKRWASQDYFPSKLGNYFGCLLTCATWEDMPYLVWRPDGSGSFVGIEGAL  
LQFMAENLNFVGLYWMNKEEVLATFDESGRIFDEIFGHHADFSLGGFHFHFKPSAGSEIPYS  
QSTYYFM SHIMLVTNLQSAYSAYEKLSFPFTPLWRAIGLVLILACLMLLVWRWRHHHEL  
PRNPYYELLVLTMGGNLEDRWVPQRFP SRLVLLTWLFATLVLRSGYQSGMYQLLRQDTQR  
NPPQTISEVLAQHFTIQLAEVNEARILASLPELRPEQLVYLEGSELQSFALAQSGSSARVA  
ILTPYEYFGYFRKVHPMSRRLHLVRERIYTQQLAFYVRRHSHLVGVLNKQIQHAHTHGFL  
EHWTRQYVSAVDEKDES VARIASYSYTLDGIDGDP SLSESEEDQQVAPVRQNVLSMREL  
AALFWLILWANLGAVVVVLELLLPRIKLRKILRKMKKSTRASATTTSTLSSPSTTKDIPFS

CKDGFQDSWPKCSLLVS

>DmelIR7c

MLHSAVHNVSLVYALVWAIKNYYGMATSTPLAVVQFPTSRESRRLHNDLIDAALGRSSGT  
GRIQFLEDDRVEMTETDTPPPPSGLTGRPIAIWFLDSLRSYFRLEMYLNQLGSPYKRNG  
FFLVIYTGLEDQPMESLKIMFRLLNMYVLNVNVLQRDGTVHLYTYYPYGPHHCQSSLP  
VYYTAFQDLAAPANGFGLTKPLFPRKLTNMHGCEMVVATFEHRPYVIIEDDPKTPGGRSIH  
GIEGLIFRSLAERMNFTIKLVEQKDKNRGEILPDGNFTGILKMMVDGEVNLTFVCFMYSKA  
RSDLMLPSTSYTSFPIVLVVPSSGGSISPMGRLTRPFRYIIWSCILVSLIFGFVLICLLKITALPGL  
RNLVLGRRNRLPFMGMWASLLGGLALYNPQRNFARYILVMWLLQTLILRAAYTGQLYLL  
LQDVEMRSPIKSLSEVLAKDYEFRILPALRTIFKDSMPTTNFHAVLSLEESLYRLREDDPGI  
TVALLQPTVNQFDFRSGPNKRHLTVLPDPLMTAPLTFYMRPHSYFKRRIDRLIMAMMSSGI  
VARYRKMVMDRIKRVSKRRNLEPKPLSIWRLSGIFVCCAGLYLVALIVFILEILTNNHRRLR  
RAFNVINRYAA

>DmelIR7d

MDIRCVVALLGLCKVQAVVWPHQHLLLEEQLASQISATLQKIFINGLAVYNFGVFISTSYE  
EMDRDRVILVHQVLNRNLYPPNFPVAVVLASKMNRKITAQVFTQLLFVQNAEQAIATAEG  
VNRNGLCVIVLLTSQPERPIMTKIFTYFMQERYNINVVILVPRLHGVQAFNVRPYTPTSCSS  
LEPVEIDIKDGLDWDVFPRLKNLHGCPVIVWDIPPYMRINWKSDDPMDGLDGLDGLL  
LRIVARKMNFTLKLIPNEPNGLIGGSSFMNGTFTGAYKMLRERRANITIGCAACTPERSTFL  
EATSPYSQMSYIIVLQARGGYSIYEVMLFPFEKYTWLLSTILGLHWIVGSRWRMPSPILA  
GWMLWIFVIRASYEASVFNFIQNSPVKPSRPTLDQALSGGFRFITDHASYRMTLKIPSFQGK  
TLISAGQPVDVFDALLKAPWKTGAFTSRAFLADHLVRHRKHRNQLVILAEKIVDNMLCM  
YFPHGSYFAWEINKLLFNMRSGIFQHHSQILAWDNLPTTTDTPGKRIHSSTESVATGFA  
ESMSFVVAALNCLMGALCISIVVFGLELLSRRRHWTGLEWLFERV

>DmelIR7e

MNHINEFVARAVLHVHHYILSVTPSLVTLCCRSNHTCNFYNKMMSTLFREWGLAPLQI  
VNVLRGVPWHPVPGRRHFNVIFTDSFAAFEEIRMEYYSREYNYNEHYFIFLQARDRLQG  
EMRLIFDYCWRYRLIHCISIQVQKSNGDILFYSYYPFGEHGCSDMEPQLINRYNGSMLVEPD  
LFPRKLRNFFGCPLRCALWDVPPFLTDEDQEEVLRVNGGYEGRLLLALAEKMNFTIAVR  
KVHVNMNRDEALEMLRRDEVDTLGGIRQTVARGMVATSSHNYHQTRVFGVLASSYELS  
SFDILFYRYRLQIWMGILGVVALSALIQLIVGRMLRERMGSRFWLNLELVFGMPLLECPR  
SHTARLYCVMLMMYTLIIRTIYQGLLYHLIRTHQLNRWPQTIESLVQKNFTVVLTPIVQEV  
DEIPSVQHMFRRLLEANSELDPLYFLEANHQLRQHVTASALDIFIHFNRLSADKVHQRGEQ  
GSGAHFEIVPEDIISMQLTMYLAKHSFLIDQLNEEIMWMRSVGLLSVWSRWELSESYLNE  
QSFQVLGTMELYAIFLMVLVGLIVGLLVFILELVSMRSIYLRKLFT

>DmelIR7f

MQGEDANLYVARALRLVIENVLAQLSTTLVVTISTRHLGTAHWFEYMMNILMDSWRMVA  
VQLLRIRPDLVNPVPGRKRVSLLMVDSYQGLLDTNITASNANFDDPDYFIFLQARDHLI  
PKELQLILDHCLAHFVWLHCNVMIQTAQVEVLVYTYYPYTADACQKAYPIPVNTFDGRKW  
KASQMFPDKLSQMHGCPVLTWHQPPFVELVWDPKHNRSRGSGFEIQLVEHLARRMNF  
SLELVNIALLRPNAYRLAEGSSEGPIEKLLQRNVNISMGYFRKTARRNQLLTPMSYYSAN  
LVAVLQLERYRIGSLALLVFPFELSVWMLLLLALLIHLGIHLPSARRGNEEDGGGGLQVVA  
LLLGAALARLPRSWRHRFIAAHWLWASIPLRISYQSLLFHLIRLQLYNTPSFSLDQLLAEGF  
QGICTANTQRLLLEMPQLARDPDSIQSVDTPFDDVDLNVLTRNRNRKIFAVANQDVTLSFL

HSSAHPNAFHVVKQPVNVEYAGMYMPKHSFLYEKMDDDIRRLDASGFIHAWRRASFASV  
HRKEQVHMTSRRYINHAKLSGIYVMVAGLYLLAGLLFAGEVLLRQRN

>DmelIR7g

MNVTSLLNFESMKYIGAQTQAASINHHVAQALRVFIEDFYQRIAPAFIVVLSCRRPSPMNF  
YRNMQLLYESVDTMIVQLVLVELGRPRRIAGPRTHNLLLVDSLDALLDIEIHTYTAQSDTS  
EYYFIFLQQRDALIPHDMQGVFAYCWRHQLINCNVMTQSSGGQVLLHTYFPYAPGQCND  
SQPTRINMFLGESWKHRDYFPSKLNHNGCPLIVLARKVSPFLDLDEGQRELRGLEGRLL  
QELSRRMNFSIQFSGLDQLKNRTTWTEKQLLQKLQERIAHLAIGYVRKRIQYATNLTPV  
FPHYSNRVVGCLLLNAHNLSLEIWSFPFQALTWICLVAGDRLALVLAVYAASLGLPIDPPE  
RPSLQLLFASWLIFGLIVRSMYSALLFFILRYHLHQRLPGNLQDLTHGDYAAMVGRRTLQD  
LREVPSLQDLLGLKSIVTSEREEEVLRTLDRCTLREGAGSHPLFFGLISQDALLHLTQRGH  
RAGAYHIIPQDVLEQQLAIYLQKSHLASHLDHLVMSIRSVGLVHHWAGQMASERYFRSR  
FLYREKRIRQPDWAVYILTAGLYLLSLVVFICELLASRRAGL

>DmelIR10a

MAVLGTVFLLFMLDLKTLNTRLNGLLVEPTRDLPQLELWLRAGSDHQDAENPYVQWFL  
LRTEIPLSIVTYQENRYWMDDPFGRRLVLMVSLDQLLTNRGAAAPIQKASTFFYILADQD  
KDSADEQLRLEGSCRQLWTQHKVYNRFFLTRDGVWIYDPFKRRDSAFGRVRYYGSET  
LDKLLFRDMAGYPLRIQMFRSVYTRPEFDKETGLLTRVTGVDFLVAQMLRERLNFMTMLLQ  
QPEKKYFGERSANGSYNGAIGSIIKDGLDICTGFFVKDYLVQQYMDFTVAVYDDEL CIYV  
PKASRIPQSILPIFAVGYDIWLG FVLTAFACALIWLTLRVINLKL RIVSLGNQHIVGQALGIM  
VDTWVWVRLNLSHLPASYAERMFIGTLCLVSVIFGAIFESSLATVYIHPYYKDINTMQE  
LDESGLKVYKYSSMADDLFFSETSPXWNRDLRADVIDEVARFRNKAGVSRYTSLILESS  
HFTLLRKIWWVPECPKYTTISYVMPRDSPWEDAVNALLRFLNAGLIVKWIQDEKSWVDI  
KMRSNILEADAESLVRVLTIGDLQAFYV VIGGNLLAFLGFLAEHFRWKLQKKG V

>DmelIR11a

MRFAILWLFSGCLLPGIQVGIWVVVRAQPTGRDVLLSRLGNQQNELNTRRLANASSYLTR  
NYIANRINTLVVREICVECPYELSERQRQLVDQILASLAPELS VLLHKGTA EETTWEYTLFV  
VNDHTAFTGQVFIFPDELLEREFFCIVVSEIQSRQFVRQTVGSIVKSNLQMHFVNVVVVA  
QLEDGTVGTYSYKLFKANCTPGITVRQINHFD RITGKPPQSQMPDLYPVRNGHLGDCPFNV  
GAAHMPPHLIYKRHKDPPASNVSIPAEDLAGIDWDL LQLLAKALKFRIQLYMPQEPSQIF  
GEGNVSGCFRQLADGTVSIAIGGLSGSDKRRSLFSKSTVYHQSNFVMV VRRDRYLGR LGP  
LILPFRGKLWGVIIVILLAVLSTCWLR SRLGLSHPIEDLLTVIVGNPIP DHRLPGKGF LRYLL  
ASWMLLTLVLRCA YQARLFDVLR LRSRHRPLPKDLSGLIKDNYTMVANGYHDFYPLELTCR  
QPLDFSARFERVQRAAPDERLTTIALISNLAYWNH KHPNISRLTFVRQPIYMYHLVIYFPRR  
FFLRPAIDRKIKQLLSAGVMAHIERRYMQYENKRKVASNDPVLLRRITKSIMNGAYRIHGL  
VIVLATGMFILELLAGRSNGRLRRWMEVHQ

>DmelIR20a

MLASLNRSTGLSAELLDLYGLVVHFLLSGEHTTVYFNPAGLDCSWGV LWQRNLTAHPQI  
VWQRNYSYPDLYYQFNAKLLVLA CLPMDSRAAIQLEILANSLSHLRTVVRLLIEVAGPDQ  
VTLARQYLSFCLRRSMLHVELYFRDYHHS LILYSFRAFPSFELVMRWISVGQGVKLFHLKL  
DDLRGHRLRVIPDLSPNTFFYRDARGDNQVTGYLWDFLATFAGRLNAGLEVVRPSWRA  
GSASDSSYMLEYSAGGLIDVGLTTTLITKWNLWAIHQYTYPLLVSSWCTMLPVEKPLATPD  
LFGRIVCPTLAMTLLL IILVTWL VFRQLRCLTRLKNSRPARIVPHLLTLLLTCSAQLLSLLI  
FPYHVRIASFEDLLRGDQKILGMRNEFYNF DGAFRARYAGVFYLIDDPNELYDLRNHFNT

TWAYTMPYIKWLVIKTQQRHFSKPLFRWSKDLCCFFDFMPTSVIVAPDSIYWESIKDFTFRIH  
QAGLMKHWIRKSFYDMIKAGKMSIKDYSLETCLKPLNIGDLEIVWRVCGAAIAVASAIFIM  
ELLYFYINVFFNSL

>DmelIR41a

MFIDLSWSLVLSAIVGKYLNESTICIFWNDKFEFQLLHKSDYISFVGINIKSFDDNGGHYIID  
TGLKKKELQNKHLFLDELVIKIIISIEVTHCETFVVFDDKIDRFVNAFNKASVYSIWRSLHN  
KFVFAHIANESPESRNHFFEDQPNILFVVRDHSSASSFDIKTNKFVGRKAENPSQMILVDRY  
LASEQRFQFGKSLFADKLNQGREVIIAGFDYPPYTVIKHNMSTNAQDMGVSGESDFKN  
VYIDGTETRIVLNFCEQFNCTIQIDSSAANDWGKVYPNMSGD GALGMLINRKADICIGAM  
YSWYEDYTYLDLSMYLVRSGITCLVPAPLRLTSWYLPLEPFKETLWAAILLCLCAEATGLV  
LAYKSEQALYVLPGYREGWWTCTSGVCTTFKLFISQSGNSKAYSALTVRVLLFACFLNDLII  
TSIYGGGLASILTIPSMDEAADTVTRLRFHRLQWAANSEAWVS AIRASDEALVKDILYNFHI  
YSDELRLRAQDQHMGRIGFTVERLPFGHFAIGNYLGPAIDQLVIMKDDIYFYQYTVAFVPR  
LWPLLDKLNLTLYSWHSSGFDKYWEYRVVADNLNLKIQQVQETMTGTGKDIGPVPLGMS  
NFAGFIIVWILGSAIATLTFLLELSLTYILKQSNLK

>DmelIR47a

MRQIKLLVWLLVGVVSSTEQLQFLKNFLEAVHKERSISTILLIQRKVHKNDFLHGLYPIF  
WPIICLDETKRVELVNNFNKDFLALVYMESEADTLLLSALAADLNHIRDARIMIWLQMSPS  
ENFLDRIVFQASKQKFLNLVIENTLKTRRFYFPFQPKVQVIDKPFEEKEIYPALWRNFMG  
KNAIAVPDLVPPRSFNSFDPKTGHRRESGSIYNVFKAFTQRYNITMLLKWPLIRNTTQEEIIG  
KSVRGEIDL PITGQLISFRHPNGSRSQPLLGMTALSIAVPCGPELPMFDRFFLFYGLATPITIT  
GYVLLNTIEIILGTLSDRIKRHPRRKKILNLVNLRVFSCILSLPTPQGNRLRSVKGQLTMV  
MSITGLILSCIVAAQTSTILTMKPQYRHIKNFQELSDSNITVVCNHLNYLTIKQQMDPKFMA  
KFMQNIWIVNSIEQMKMIFDLNTSYAYQTFSYKKDPFTLLQMHTTRKAFCRTPGLDLVSG  
LAYTAVLEKNSIYALALQDYTLKAFSAGLVYYWAEESIRDLISTVGRTOFEKLPVIGYQSL  
KLQDYNVCWKILLIGGALAFCVFIVEVVVGLINRRI

>DmelIR47b

MREAQIII FLTSAAAVTLKQYEFLEXSFLKAGEQEQTITLLMMQKHVHTKNLLQGLYXPX  
WPIIHVETQRIKFIALLYMSSEKDIFLSSLAANLKFERLDKPFQKSNIFPVLWRNYMGXIAL  
TLDHLVEPRSFYWTDPRNTIKRRTGYIYMLITNFAEQHNITLQLXSPPNEDMSQMVIIERTH  
KGPRSTHNWADDQLETFERXQDSLLPWHGSMIAIVVPCGQEMSAYERFHAHAHAFRAPIIFF  
GFHIFLSLIDFLLRTISDRIRCNPRIQLLQTVLSLCLVLRILSTSLPNSNXLRSRLRDNSPXX  
XVLQAXSYSALWXLGTAXQXHNRFQSHKLHDYXTTDSXHSIEVPGLLKARNXXIXL  
FHIFSSLGTFDLRIGSAGSHTSGVEFRYYELLDXSSLENNIVSQVFTILKLPYSRFRVLKL  
EDCRGCWQTLFVGFSIATFV FIVNVLMGFFRNINQKK

>DmelIR48a

MHLLITETYMIIGKTLHDILNELNERLIISTNIIFCKQFDNLIHFEAQTSRFVYSSLEAFNITSL  
WNHVGNDNKL FVIVGNVPPYELFAKLELSSPENCTQFILNNTVDMCADALVKNKAFSVS  
RELRIAPANVIVPHGKPLLSYRYLAAPFNTKVWIALGTYVFLISGFLCLIHWLRSWKWDFS  
QNLLEVYSSLLFTVFHLKATNGIERIYILFGVLFISGFVYSTSYLRLLKSMLIAETFEKQIQTF  
EELAESNIPLINPYDRMIFQHHPKSLWTAVRTVSSSETLLNHRSHGYVRLCPAILTASKIPS  
HTHRHLFSVCRFSHEQEVVPGKSSXXSLVPCIRKRNREXNHLGCLSGVSWPGISXFFHYG  
ALGGEAFGSILLHDANYFSPRLFRRLAELHYGSY

>DmelIR48b

MILQQSSNLLKLLLLLAISSVRTQGLNDIIIELNQRLNISNNFLYCNQSDKLNENEYIKEYLQHM  
PPISLMIFTSIESMNFTQVEYNLADGNKLFIMGNEEPPYDFLHALNLHFQFAEYIIVIDEPV  
DLKKSTKWLDVFNHLWQQGYVQLLIYTSYDEKLYHKIIFPETVIEETLVEQYISIRGSFNNL  
YGYVVRVAAYNNAPRSMLYVNRWKGKHFAGFYMRFLRAFIDARNGSFVPLTPSNSPGNC  
TLNLVNETVDVCADALANPAAFSLTHGFRIASANVLVTHAKPLHSYRYLTAPFQWSVWA  
CLVIYVLLVNVNLSFIGWLRSGKWEFSKYLLEVFSSLLFSGFYLKEIRGRERYILFGVLFIA  
FVYSTEYLGLLKSMLISEVFEKQIDTFEALVESNITLMVDPYDKILFAKYNMPEILSPIMELV  
SFETLLKHRNRFQDYAYILFSDRMALYDYAQQFLKHPKLLRIPIDFSFLYTGIPMRKRWFL  
KHHLGRAWYWAFESGLTRKLALDADFEAVRVGYLSFLITEHVEAQPLNVDYFVMPAIALA  
IGYILALLSFVIEMTAWRIREFLGCRKATMTSTGCSEGGHVDVD

>DmelIR48c

MSLLRIILIIIFLRIVSSIPDTIISHLSAELQIKIQIYFGLGNDLYDFSRLDGNQKIIISHNISEEF  
KTYHDEPVLIIIRLERDLNLDLNLATLDVLRSYLTDQRQYNDILLIDNDEENLNSYVDIRKAYW  
NAGFSQVLIYNSQQRWTSIKPYPYLQIRPTSLKEYIENRNRNLMGYPLRVLTNDPPHCF  
VDKDELPGSPNRYKGSIVTMLKIFADQLNATFQANPFREFRISTADCVMVSDDEIDAC  
GSIFIRTYTYATSQPVRLNRVIMAPFGNPIEFYFFRPFDLVWVIGTGIIIVYIAVMGSSL  
HRWHFKEWNVGQYLLAVQTLNRELSLPQSSSGSKFMLLLLLFAIGFILSNLYVALLSMM  
LTTKLYQRPIENLADLKAANVNILLQTHNIRPNSVYGSSEELRERFLLVEESQHLEKRNGLD  
PSYAYVDSERDMDFYLYQQKFLRRRRMKKLSNPVGYTWAVQVIKQNVVLEKHYNDHVQ  
RFFETGLQNKLVDDVHELAVKAGFLHFFPTQTQTIEPLRLEDIVMAAMVLGGGHALAVIC  
FLVELFA

>DmelIR51a

MYNVLVLFLLLFTRAQMEPHRRGHNMILLRSVLTVIRGRENWKNTPIFLGGHCNSDDL  
NLMSWLQNTMEVTCHTVDTSTSAKNENALGHFNINADNSLGLLFCQSSHELIVFNMDKR  
LRRRLGIRLIVILSDKRSSSSKAIMSTFKRLWHFQFQXNFQGYVVSTPVENDIPRVFFVKDK  
KTGRKQIRGFGYRTFVEYLHRYNASLHVSNSQQEHAJNSVNMGRINQIVDGGLEISLHP  
YVDVPENMGDNSYPLLIASNCLIVPVRNEISRYMYLLLPLNQSSWILLGSIYISGVLYYI  
QPGLLHRTWDQRIGLNILDSISRIINICSPSRIYNPSLRYFIVSVHLSILGFVVTNLYSIMLGSF  
FTTLVVGEGVDSMQQLIQXQQKVLVYKYYEVSTFLRHVEPDLVDGVAQLLVGVNASEQVS  
ALLGFNRSYAYPFTLERWEFFSLQQQYAFKPIFRFSSACLGSPHGYPMKSDCHLQSSSLNMF  
MRIQAAGLLRHVVVSDFNDAMRAGYVRLLNENFLGFHSLDVSRLRLRWAVLLCGWLLST  
LIFLCER

>DmelIR51b

MCKVLTLLVILLALTNAAYNVTLKSVLSLISTREPWINTPIFVGHNTQGGDLNDLIHWL  
HQTMGVTSMTMNLFLQPEHIRPLGHFKITRYNGIALFFCHDKHDIMWLTLDNRNLRKLRIR  
LIILRNQRSGSQGAIKSIFNALWQYQFLNVLVLQRDQLYSYTPYPAMRFFKLDIHTEPLFPH  
AARNFHGYVVSTPAENDIPRVFHVHDPLTKSRKVLGYAYRTFVEYLDHYNASLRLTNPDE  
NLDPTTSVNMNHIVQLIIDGQLEISLHPYVFTPTATKSYPLLIYPNCLIVPMRNEIPRHYL  
LRPFQLYSWYILLFAVYITGILYCISPKNKSSWPQRLGLNFLDAISKILFISPPITYRPTWR  
HLIIFLQLSVLGFMSWYNIELDSFFTTIVVGEQVNSMDQLVHQQQRVLVKEYEINTFLR  
HVEPRLVEKVSRLVNVNASEQVSALLSFNRSFAYPFTEERWQFFAMQQQYAFKPIFRFSSA  
CLGSPHIGYPMRVDSHLETSLNHFILKIQDTGLLNHVVVSDFNDAMRAGYVRFVDNVLG  
YQSIDVDTLRLGWCVLGGWILSALVFSCEYWHLYPWRFA

>DmelIR52a

MALGWSVILGFIGQLSAQILNYTQSRDLELLEGLSFRVLSRLNLEEEYNTLLIYGKECVFH  
SLLRKLEISAVTVPSGSTDYDWSFSTAILILSCGYDAENEENSYTLMKLRTRRLIYLEDNS  
EPESVCMRYSLKEQHNIAMVKSDFDQSDTFYSCRLFQTPNYVEGHFFKDQPIYIENFQNM  
RGATIRTVADSLVPRITLYRDEKSGETKMMGYLGHMINTYAQKLNAKLHFIDTSKLGAKK  
PSVLDIMNWNVEDIVIDGITALASSLQFKNMDSVWYPYLLTGYCLMVPVPAKMPYNLVYS  
MIVDPLVLSIIFVMLCLFSVLIITYQHLSWKNLTLANILLNDKSLRGLLGQSFPFPNPSKHL  
KLIIFVLCFASVMITTMYEAYLQSYFTQPPSEPYIRSFRDIGNSSLKMAISRLEVNVLTSLNN  
SHFREISEDHLLIFDDLSEYLVLRDSFNSTFIFVSVDRWNGYEEQQKLFABPAFYLATNLCF  
NQFMLFSPPLRRYLPHRHLEFDMMRQHEFGLVTFWKSQSFIEMVRLGLASMEDLSRKR  
NEEVSLLLDDISWILKLYLGAMFISSFCFILEILRCGERCKRLWRWCRW

>DmelIR52b

MTWLVILLCFLGYMAAHIADISVQNQSLMDNELINLLLKLRNEEFYDTLLVYGKDCEFHS  
VIKNVDVAVVLVSDSMNFEWNFSSLTLILSCGPDIDNGGPNSTSIKLRNRRLVLLKEDFQP  
SNICNIYTQKEQYNIALVRENFTKSKSIYTCRYFQDPNVDEVNLSGTPKPIFIEQFQNMKGKA  
IRIVPDLPPRVMLYQDANDGELKMIGYVANLITNFAQKVNATLQLDFLKPSTSITEISMA  
KDELDMGITLEASLNTSNETSSYPYLLTSYCLMVQVPAKFPYNLVYALIVDPLVLGIIFV  
LFLLSVLLIYSQKMSWQDLVANILLNDKSLRGLLGQSFPFPLNASKKLRILFTILCFASIM  
LTTMYEAYLQSFFTNPPSEPEICSFQDVGSYNRRIAMSALEVNGLIKTNNSHFREIRMDDLE  
IFDNMPECYELRDAFNLSYNYVVTGDRWRSYAEQQTLFKEPVFYFARDLFCFSRLIFLSVPL  
RRHLPYRHLFDEHMMQQHEFGFVNYWMSHSFFDMVRLGLTSLKDLRPLAYTPSLLMD  
DISWIMKIYLAIVLVCVFCFLLEIGVDKWKRWMKFRNLQILNTC

>DmelIR52c

MVWLIILFCLGNSSSQILDVTNNSHLDFDYRLFGLLQRLQVEKSYDTLLVYGEDCAIPSLF  
ERLQVPAVLVSSGSTNFDWNFSSLTLILSCNFQDEREENYRTLMKLTSTRRLILLKGHIKPE  
SVCDFYSKKEQHNAMVKENFYQLEVVYSCRLFQDQNYEKLNLFDGKSIYKDQFRNMH  
GAPIRTLSDKEPRTIPYIDSKTGEEKFKGYVGM LISQFVKKVNATMQIREDLIKDDEEVSF  
VDITNFTSNDILDIGICEARTLEMSNYDAISYPYLMSSYCFMAPLPDSLFPDSVYMAIVAPSI  
LIMFLIIFCICSVLIYIQUERSYRSLTIRSVLMNDICLRGFLAQPFPFPRQYNRKLKLFMLVCF  
SSLISTTMYTAYLQAFWGPPIEPRLTSFDDVKKSRYTMAINIYEREFLEALNVSLEDVEIYD  
YGKFSKLRSTFNTNYLFPVTALQWFTINEEQKLFKYKIFYCDAFCLNQFDILSIPLRRHLP  
YRDIFEEHMLLQKEFGLTKYWIDQSYRDMIRANLTTFKDFSPLLENDYIEVHNLVWVFTM  
YFVGMGMGLCFFILEILRPLRYWRNCKIKCEYCYAFLKNFAK

>DmelIR52d

MVRIIILLCLGYTKARILDATNTNHTDLEERLLSLLLRLQEQFFNTLLIYGEDCAFSSLSR  
RLQVPTILVSSGSTSFENYSSLALILTCEFKAEREENYQTLKQLQMNRRLLLNNGNIKPDS  
VCDFYSKKDQYNIAMVNNNFHQVGIYACRLFQERNYKVLSEGNPIYVDQFRNMQGA  
LLKSITFNLIIPGSMAYRDPKTGQEKHIGYVANLLNMFVEKVNATLDMQVKLHKAGKKTSTF  
YNITKWASEDLVDIGMSYAAYFEMTNFDTISYPYLMSTCFMVPLPDMMPNSEIYMGIVD  
PPVLVVLIAIFCIFSVM LN YIKQRSWRSLSVNVLLNDICLRGFLAQPFPFPRQSNRKLK LIS  
MLVCFFSVITTTMYTSYLQSFMWGPPIDPKMCSFADLENSRYKLAIRRYDIEMLRPFNVSM  
DHVVVFDESSQLEYLRDSFDDNYMYPMSALSWSAFKEQQKLFAPFLFYSEKLCCLKPISF  
FSFPIRRHLPYRDLFEEHMLQQNEFGLSTYWIDRSFSDMVRLKLATMNDFSPPRELDYIEV  
SDLSWVFGMYFTGLGISCCCFGLELLGLPSWTRRLRLTNWLRVRN

>DmelIR54a



MWTVITGIVLWAPVLVAGSAVDFIFRAAAEHSLSVIMIRIDYCPYNWAKDIFENQTIPVVVL  
SDSETFINIRMFSRPLHVACLPGHELQKDLALLENFTSSLMDFPSQKKIVYISNNFSDPTRM  
DYIFETCYHRRINIVGLLASDEHRYFYRYHLYPSFRTEYRSLESSTIFDKDFPNMHGHP  
VMPDQWLPRSVLYVDRRTGKQILAGSVGRFFHVLSWKLNATLQLSKKVTTRFLNATAL  
KELSESFSVDVPASLTIMERVEQLASTSYPMEVTHVCLMVPVARRIPIKDIYFILSSASNMFL  
AIVIVSSYGLALNLLRNMTHRDVRLVDFVLDKALRGILGQSFNPLSRSFSTRILIFLMLGI  
VGLNVSSIFGAGLDTLMAHPPRQFQARSFAGLRRTKIPLVTTEEDFPTWMKLRVPMPLVVN  
VSEYNHLRNGRNTSNAYFASRLYWNLFSEQQKRFTRELFYSTDDCLWSLALLSFQWPQN  
SLFTEPVSQLELVNANGLYDFWVGMHYDMTAAGLSGLEDPSLQLKEREHPTSLRIVDF  
QWMWQAYGTFMVIAILVFLLEVSWHRITSLFVSLVY

>DmelIR56a

MGSRFFIRNLILFGLLASSNMQIPFGELEKKFELDVDLLGVTELVGHIQGLYSITVYADCID  
IHPSIQQRIMDKFMVPVNTIGSNLSRPNYHKLDNSRIRIVLFTGLNDTILVNLNKTDPYSD  
NFYMLAYASAIKNKCIELDFIEEVFTLLWKMSIQNAILLIRGEFMMEMWSYLYMGKIHKIK  
LTKPNSYLESLRKYNYRFSLEVINDPPAIFWYNSSEQADVTGGNLSVSGPLGLIINFLRHL  
NVTIDIVPIPGKQTSQYELFQQPDNLRAENGVNMVGSALLKYSPMVTQSRMCLLVSNRR  
MIPFSRFLDRLVSPGVHKLTFVSSIGIFVIKYFSHRPRSFDVDAIFCTIRFFFAIPLPSIILNRLPV  
VDRFIEVFIIIFVQILLSSNISITTSALTTFWEPPPIINVETMRASGLHILTEDPTILQAFKENILP  
SSLADLVILVDEDTYFHHVTTLNNSYVYVVQAHNWQIFRLYQQQMTNEPFEIASEELCSK  
WRILGIPLNPKSPLRFMFKDYFYRILESGLREQVWHSGFKKFCEFNLLKLPVDSVDSWQ  
PLSIEFYSNVIRAYIIGLVIATLAFVAELLHNGYRRKNVKKT

>DmelIR56b

MLLDTDLASGVIRSPYSFDIPHAFIFNETQFVVPKFCGPYMEIVKHFAEVYHYQLFLDSLES  
LPKKSVEEQDIISGKYNLHLHGVIIRPEETSDFFNATQHSYPLELMTNCVMVPLAPELKW  
MYMVWPLGKYIWTCLFLGTFYVALLLRYVHWREPGNATRSYTRNVLHAMALLMFSAN  
MNMSVCLKHASIRVIIFYTLLYIFGFILTNYHLSHMTAFDMKPVFLRPIDTWSDLIHSRLRIV  
IHDSLLEELRWLPVEYQALLASPSRSYAYVVTQDAWLFFNRQQKVLIQPYFHLSKVCFGG  
LFNALPMASNASFADSLNKFILNVWQAGLWNYWEELAFRYAEQAGYAKVFLDTYPVEPL  
NLEFFTAWIVLSAGIPISSLAFCLELFIHRRKQRRPQYERFECYDY

>DmelIR56c

MRSSFRICLFLTTYHPSHGWNMQHLLNLLAPFGRMNVFQEIVWFVSPHQRLDQLDEFIM  
RIDEAFGKSATQTVVNNNTEMRMIYSSARRNHMSFVFTTGAEDPIMKVFSKVLLGRHFYV  
SMVIYVDKVGDMHPIYDLLTFAYNQFFNSMVHFESMEGVNQLFGVSKFPVMSFENRTD  
FLKYMGIWKQVQNARSDVGGFGFTTPLRQDLPHLFQSQGHYDGSYRIIETFVRFINGSF  
KELIMPPDSLGGQVINMKDALQLIRERKMEFCAHAYALFMSDEELEKSYPLLVVQWCLM  
VPLYNSVSTYFYPLQPFDNVWFFALGALLALVLELMWLRMFGGWSGYRGAVLNSFC  
YIINVPIEQQLQQPCLLRFLLATVFFHGFLLSAYYTSNLGSILTVNLFHAQINTMNDIVSAQ  
LPVMIIDYEMEFLLNLNKELPQEFLELLRPVDSAVFSEHQTSFNSSFAYFVTEHDWEFLDEQ  
QKHLKQRLFKLSSICFGSYHLAFPLQMDSSLWRDIEYFTFRIHSSGLLNIFYARSSFGSALHA  
GLVQRMPDTQEYTSAGLQHLAIAFILLVMSFLAGIVFVLETLSR

>DmelIR56d

MDNRAAELILRERNIFPTNGSDNITLLNNMFVLEMFYRITQLYHFKNFIFYISERLDLNNKD  
SQEFFHNFWTYFPMAPNLIITREHHLGIPMMQFISTPSLVMVFTTGKDDPIMELASHNQGGI  
HWLKTIFVLFPQLSRDFETNPESLAQFTAIEIKDVYDWWVRKQFINTFLITIKDNVFIIDPY

PTPSIVNKTGVWQAEFFHKYAKNMKGYLVRTPILYDMPRVFKSDRPTNRYEKNFIHGTS  
GNLFLGFLEFVNATLMDTSANVTADYLNMTNLLDLVSQGVYETLIHSFTEITTKFVVSYSY  
PIGINDCCIMVPYRNQSPADQYMHEALQENVVWLISLFTLYITVAIYLCSPLRPRDLSSAFL  
QSICTLTYSVPTFIIRTPTLRMRYLYILLAIWGIIVTSNLYISRMTSYFTTAPPVRQINTVQDVV  
EANLRIKMLAIEYERMAKSPLQYPESYLNQVDLVDKHMLDLHRDPFNFSFGYTVSSDRW  
RFLNLQQLHLRKPIFRLTEICEGPFYHVFLPHKDSHMRSVMTEYIMIAQQAGLMNHWERE  
TFWEAVHLHRIHVHLFDDEPMALSDFSSLLRTWTLGLLAGLAFAAEMKWHEHVTFKR  
RPVIRITRKPRSFLRRFMKL

>DmelIR60a

MWCNNPGLIIIFLGQILNLCQGIVNLSNETANTVIFMLPEKDLGPDVWKAGVVGCLDSFAQI  
FFFRNPKERFTRAYNMLVHAFHLSPADQIQEGFSKLINEAVTNPAPPDREELFQMRVSD  
YNITNGTEDKGELILADNYVIVVDSVDRLKELMKKKIVEMRSWNPARGFLVLFHNATCR  
NRPLGVASNIFKDLMEMFYVHRVALLYANSTMNYNLLVNDYYSNVNCRILNVQSVGQCH  
DGKLYPNNNAVVKASMQDYVSGFSPRNCTFFACSSISAPFVEADCILGLEMRILGFMKNRLK  
FDVNQTCLESRGEMDGPANWTGLLGKVQNNCEDFVFGGYYPDNEVADHFWGSDTYLQ  
DAHTWYIKMADRRPAWQALVGIFEAYTWIGFILILISWLFWFTLVMILPEPKYYQQLSLTA  
INALAVTISIAVQERPICETTRLFFMALTLYGLNVVATYTSKMIATFQDPGYLHQLDELTEVV  
AAGIPFGGHEESRDWFENDDDMWIFNGYNISPEFIPQSKNLEAVKWGQRCILSNRMYTMQ  
SPLADVIAFPNNVFSSPVQMIMKAGFPFLFEMNSIIRLMRDVGIFQKIDADFRYNNTYLN  
RINKMRPQFPETAIVLTTEHLKGPFFILVVGSCWAALTFIGELIHRWRTQLVSTSEQQDRS  
DKRRRRRRRRKPEKDNRWQRQVQVAPVVRFTPVKRRKVFQGQTSQK

>DmelIR60b

MRRSLYLIIAIGLVDVHCVSLRYILNALENELQYRAILLVESASEIESCWEQKYIQGAVPILN  
FNANQSLYLKDALNTNILALVCLNENVESTMQALYENLEDMRDTPILFVLSDSKVQDVF  
LECLRRKMLNVLAFAKGLDRGFVYSFRAFPTFRVIERNVMDILQYFEQQLLEDLGGHTLTTLT  
DNIIPRTVVYKSPDGSRQLAGYLYPFLRNYVSTINATLKVCWHLVPEDGMIQLGEVRLSE  
IHDVDFPLGMHGHIEHGSTSQNVPLEVSSWFLMLPMEPSLSRAQFFIMLGFQKVTPLLLTI  
LLSTAHRIEMGLRPSWRCYVLGDRVLQGTGQAFFLPRRLSVKLMMLVSYLILLNGFTFSNY  
SITSLETWLHPPSGHPIHSWEQMRTLNLKVLIVPSELDSMTKALGKQFTESNSDLFELSKS  
GNFQDKRLAMDQSYAYPVTCTLWPLLEHAQIRLPKPEFRSREMVLIPLIMAMPLPKNS  
MFHKS LNRYRALTHQSGLYEFWFKRSF NELVALRKIHYKVNGDHQIYRDFEWQDFS YVW  
LGFVGGTIASILVLLAEIGYHRWQLNQN

>DmelIR60c

MEMRLALFFTFACLAGAHDGSLRNMLKSLEDELGYRTILLLEGFVYSFKAFPTLRVVKRR  
VKDVRRYFEPQLEDLGGCVLKVVPDGMPTMVYQGEDGELQMGGYLSHFIRNYVSTIN  
ASLQIRWDLFPEDGDFDMDSLTGSNHVDFPLGLGSLSFQTLHKDVAMEISSWFLMLPMEP  
SLPRARFFIRFGISLYLIPLIILLAIVLSNAHRFEAGLTPSWRCCSMGNTVLRGVLAQAFVLP  
KGLSPKLMFVYWLLVSGFFVSNYVIVYLTAWLIQPPTSDPVTDFDQMRAKCLKILMVPT  
DMDYLKSIRGAEYVDAHSDVFQTADSTDFQTQRMSMELHFAFSVTGTLWPLL RQAQVKL  
HRPIFRRSKEMVFLPFVIMGMTMPNNSIFLSSLKQYRLRTSEAGLYLLWFKKSFSELVAIHK  
ISYKEDWVHDSYDLKWEDFLFAWLGLGTTV SCLALLAEIGYHRWLWKRTHQ

>DmelIR60d

MRLAIYVAFLSSIGNRSGFLSLLMSLGKELHYKTILLVGGSSTCWSLEPFETGVPILNLRG  
ENNAYPQDTFNSQMLALACLQTESEDAVKLLYRSLKDMRDTP TLLFASSEHIIHDTLFLGC

FRENMLNVLALTASSKEFIYSYQAFPTFRVIKRLVEIHRYPQLKDLGGHIVSALPGNIM  
PRTMCYRNAEGERQLAGYLNTFIRNYVESINGTLRISWGLVPEDDMRHLTISRLSKIQHVD  
FPLGIIPLYNKTDKQHVYMEISSWFLMLPMETSVPRAHLFVKLGLERLLPIVVVAVLGN  
AHRIEVGLGPSWRCYYLADKVLRGALAQPIVLPRLSPKLMLIYSLLLSGFFLSNYMA  
SLTTWLHPPASDRILEWDQLRYLHLKVLTIPEEFKYMSLILGTFMTAYGSIFQLTNSTDF  
QRRRISMDPSYAYPVTTSLWPFLELSQVRLRRPLFRRSYDMVLQPFQVMSLPLPRNSIFHK  
SLLRYAALTRETGLYYYWFRRSYELVALGKISYKEEEGNPYCDLKWNDFRIVWLAFLGG  
TIISCLALLLEVAHYRWHLGNSSL

>DmelIR60e

MVIKMFLLVSVLLCLVGASDSESMQVQVLQDLNLALQTELVFIDFECCATSEILHKLD  
SPRILLSSNSREARDLRIRGNFTESTLIIVSVMDSDLNPLVASLLPRLDELHELHIVFLSNEE  
PGFQKQDLYTYCFKEGFVNVILMSGKGLYSYLPYPSIQPISLSNVSEYFDRARIIRNFQGFV  
RILRSTLAPRDFEYSNEQGGVLRAGYLFTAVKELTYRYNATIESVPIPDLPDYDYLVAEM  
LHTKKIDIVCYFKDFSLEVAYTAPLSIIREYFMAPHARPISSYLYYSKPFGWTLWAVVISTVL  
YGTVMHLAARGARVEIGKCLLYSLSHILYNCHQKIRVAGWRDVAIHGILTIGGFILTNVYL  
ATLSSILTSGLYDEEYNTLEDLARAPYPSLHDEYYRSQMKAKTFLPERLRRNSLSLNATLL  
KAYRDGLNQSYIYLYEDRLELILMQQYLLKTPRFNMIRQAVGFTLESYCVSNSLPYLAMT  
SEFMRLQEHGISIKMKADTFRELIHQGIYTLMRDDEPPAKAFDLDYFFAFVLXTVGLISS  
LLVFFAELVSGHL

>DmelIR62a

MYLQFLFALFLSRYQIVATENFDRAFELALFLDRIGRVHRLHAITIVNSLGSVDPSYDDLH  
RGLMCNSSNHFYMLPQMTATDKDSSHVHFSSLQDEETIYLVFARDSKDAVIYLQAERARG  
RRYTRTMFLLRKQESQKDIKYFFELLWKLQFRSALVVVAARNFYQMDPYPTVRVIRMRL  
SSYDPHHVFPANRKNFRGYRMRLPVQQDVPNTFWYKNRRTKAWELAGLGGILINQLM  
MHLNVTMDLFRFEVNGSSLLNMAALTDLIVKGKVELSPHLYDTLQSNSTVDYSYPTQVAP  
RCFMIPLDNEISRSLYVFLPFSLTMWLCLLVLVVFVYVRRLLIPDGHFWAILGVPAGQ  
VRYGNRKPVRFRSTFLILFGIFILGQTYSTKLTSSTVTLIRRPDLSLEELFLPYRILVLPD  
VYAIVDSLGHAEQFSTKFSCTDAENFSQKRISMHPYIYPISTIRWRFFDMQQRFLRKKRFY  
FSKICHGSFPYQYQLRVDSHLKDALHRFLLHVQQAGLHDLWLDTCYRKAHRMGYLKDFS  
TLAELEEKRLRPLALNLLVPAFSLFLCGMLGSGIAFLVEIRHSFGCRQKPPSINRNPGD

>DmelIR67a

MLPILVPVLLLFNETSWINPILTSIYKDRHHETVLLLQHSQHGNASGLERFPWPVFSFNEQM  
DFYVRGKYNSEMLVLIWQTGNSDWDLDLWQALDRSLLNMRKVRVLLLRKWEKIPTADV  
AATAEHLFLHVAVIGQGNRIYRLQPYAPQSWLQVDPIESPIFIKIRNYFGRYIVTLDPQFPP  
RSIVYRNPKTDEIQMTGYVYKFLLEFIRIYNFTFRWQRPIVQGERMNLILLRNMTLNGTINL  
AISLCGFETPSXLGVFSDVYDMEEWYIMVPRAEISADVYVVMVSGNFLIVLIIFYFIFTIL  
DTCFGPLLLKERVDSNLMLNERMISGIMGQSFNMSARNTISSKVTNATLFLGLVLSTLY  
AAHLKTLTKRPTSQQISNFKQLRDSPTVVFEEAERFYLKHAWRPIRYIKDQLNFRETIE  
YNALRMGLNRSNAFSAITSEWMIVAQRQELFKQPIFTVQPELVIQTSVLLSLVMQSNISY  
EDHINDLIHRVQSAGIVEYWKHQTLREMITMGMISQKDPFPYVAFREFKVGDLFWIWLW  
VSFLFMSFVIFLCELLVDCFISKTLIRNKRPH

>DmelIR67b

MELLYLNTLQSLSLLEGNRLVQTVQELNNIYQTELVFLEFGNGADILESAQGTFFVPTLWI  
KNPQNQKVMKGNFTSCTLTILYLEDEHLDRGLYYLANWLWEYHHLEVLIFNGGSYDKLI

QIFSRCFNEGfvNVLVMLPGSDELYTFMPYQDLKILNLKSIKEFYSLSRKKMDLNGYNITS  
GLVIAGAPRWFSFRDRQNRLILTGYMLRMIVDFTNHFNGSVRLMNVLTVNDGLELLANRT  
IDFFPFLIRPLKSFSMSNILENCGLIVPTSRLPNWVYLLRPYAFDTWIAWLIMLIYCSLA  
LRILSKGQISISA AFLKVLRLV MYLSGSRDMGTRPTTRRLFLVILTTSGFILTNYVAQLSS  
NSAAGLYEKQINTWEDLDKSDSIWPLIDVDIKTMEKLIPDRTKLLKKIVPTLEADVDTYRR  
NLNTSCIHSGFFDRIDFALYQQKFLRFPIFRKFPHELLYQQPLQISAAFGRPYLQLFNWVFRKI  
FESGIYLMKDDAYRHGIQSGLLNLAFRDRHLEVKSNDVEYYYLIAGLWFGGLTLATVCF  
LLELLIGYAKIKVTISCKMNIM

>DmelIR67c

MFCWLIFLNIILLSDRSESWSAREVIHQFNHDQQQLQLNILDCNDVELQIGQEVSNLVNS  
TADKMKILGRFSSHSLIACFKDSTRNRTLNGVKELLWGLQYLPILFVVDSDNMDFYFQQAL  
RHGFIHVLALNFMNGSLYTYKPYPKVEVHQIKDMQKFYKLTCLRNLQGGAVRTTVETMT  
PRCFRYNRHGGQLVYAGYMYRMVKEFISTYNGTEEHVFGNVDTVPYKEGLAALKNGEID  
MMPRIIHALEWYYFYRSHILYNIKTYIMVPWAEPLPKSLYFIQPFRTVWITIMVSFVYASI  
VIWWIRYRQQGNSSLTQSFMDVLQLLFQLPLSKIWHFNMGTHQVVSFIVLFVFGFMLTNL  
YTAQLSSYLTTGLFKSQINTFDDLFRKRTLLVESFDAEVLHNMTKEKIIQKEFESIILTSIE  
EVFKHRKSLNTSYAYEAYEDRIAFELSQQRYLRVPIFKILKEVYDQRPVVALRHGLPYVEL  
FNYYLRRIFESGIWIKLQEDSFLEGIASGEISFRKSKSREIKIFDKDFYFFAYILLGMGWCVS  
TIALFLELWSFKYSVTNVLHEG

>DmelIR68a

MRCLWILIVAFISLAMATSIPIPIANPAPLSGYEMQLKILLQKILWVANVKRCFAVITDDLHY  
PIYDRIFVESVGRRVIPFFVMRTNESDDLQRPSRQVELFVKAIKSSDCELVITILNGWQVQ  
RFLGYIYDNRSLNMQKKFVLLHDLRLFESDMIHLWSVFIDAIFLKRQLDNKYTISTIAFPGI  
LSGVLVMKNIANWELGKGLNGRILFADKTSNLFGTSLPVAISEHVPMVLWANATKSFQGV  
EVEIMNALGKALNFKPVYYKPNQ TENMDWTELDGGASVAYGSGNPDGYAQNTHIDSM  
LVDEVAHSARFAIGDLHLFQVYLKLVELSAPHNFECLTFLTPESSDNSWQTFILPFSAGM  
WVGVLSSLFVVGTVFYAISFLNAIINGNVSSSEFFRCLRPNRNVPMDPKIYRRISFRIASRYR  
SSKGDRMPRDLFDGYTNCILLTYSMILLYVALPRMPRNWPLRVLTGWYWIYCILLVATYRA  
SFTAILANPAARVTIDTLEDLLRSHIPSTGATENRQFFLEANDEVARKVGEKMEVFGYSDD  
LTSRIAKGQCAYDNEFYLRYLVADESGSALHIMKECVLYMPVVLAMEKNSALKPRVD  
ASIQHLAEGGLIAKWLKDAIEHLPAEALAQQEALMNIQKFWSSFVALLIGYVISMLTLLAE  
RWHFKHIVMKHPMYDVYNPSLYYNFKRIYPQH

>DmelIR68b

MKFLVGLLLQWYLPGIYALAEIACRIAVEQNVQVTYLYRCASCPASFDADYSALELDLYRC  
VGSRLPVITRNMEAHELEPFRRDLSLIFQIPAAEKGDLSVRRILDMLNPHQRRKHMHKYL  
FVWPNAGRHQLLRLFRGSWAKKLLYGLAITGRENGTFDFDPFAWGGLQVIQRLDGEVPY  
ARKVKDLRGYPLRFSMFTDPLMAMPRSPVETAGYQAVDGVAAARVVGEMLNASVTYVFP  
EDNESYGRCLPNGNYTGVVSDIVGGHTHFAPNSRFVLDICIWPAVEVLPYTRRNHLHVP  
ASAIQPEYLIFVRVFRRTVWYLLVTLVVLVFWVMQRLQRRIPRRGVIQFQATWYEILE  
MFGKTHVGEPAGRSSFSMRTFLMGWILFSYVLSTIYFAKLESGFVRPSYEEQVDRVDDL  
VHLDVHIYAVTTMYDAVRSALTEHQYGLLENRSRQLPLGIATSYYQPVRRRRDRRAAFIM  
RDFHARDFLAITYDSQAERPAYHIAREYLRSMICTYILPRGSPFLHRLESLSYSGFLEHGFFE  
WRQMDLITRVGASPDAAEFLEDLGDQTDSDSGSNELAIRNKKVVLTLTDILQGAFYLSVVG  
IGISCLGFAVEHAHWFWRRQTLRVAEARTS

>DmelIR85a

MSIQWLKHILLAILVNLAGTRENHIPLDLKSSIVMVKMSQILCKARIKVLVYFENQTS  
HEHTGQILKEVTKCDISNQNTPLEAVKDDGILMYMVMITTNISQPLELSLRKKSAAKHRS  
HVFLLRDADTVSDAWMRASFRQFWKIWLLNIVILYWRDGRNLNAYRYNPFMDNYLIPVD  
NKPNEVPTLEQLFPKTIPNMQRKPLRMCIYKDDVRAIFWRQGTILGTDGLLAAYVAERLN  
ATMMITRPHSYNNHNLSSDICFLEVAKEYVDVAMNIRFLVPDTFRKQAESTVSHTRDDLC  
VIVPKAKTAPTFWNIFRSFGSLVWALILVSVLVANVFCYILKSEVGRVPMQLFAGALTMPM  
TQIPPNSIRLFLIFWLYFGLLCSAFKGNLTSMMVFQPYLPDINQLGALARSHYHIIIRPRH  
VKHIQHFLTGLGHKHESRIREQMLEVSDTQMYEMMRNNDIRFAYLEKYHIARFQVNSRVH  
MHLGRPLFHLMNSCLVPFHAVYIVPYGSPYLGFLDSLIRSSHEFGFERYWDRIMNSAFIKS  
GVKVVNRRRGSGNDEPVVLKLQHFHAVFALWLVGIGMACIVLAWEHLTHNYNLAVTKRR  
D

>DmelIR87a

MSTPEQRFWLAALLFLLSQHSEVRGFGINLMKVQTEDKGQEACILALLRKYFDSGDGLSG  
SVLCINRNYQLPNIEEQLLRGVNNYENYPWSLLITNSREGPSPAKFLMNEKPQCYFLIVDN  
LEDEDLDEVFEHWKGMVNWNPQAQFVVYLASLEETDEEMNDLMVELLLTFINKKIFNVN  
VIGQSEENQFYGKTVFPYHPDNNCGNRVISVELLDACDYPSEETDSEDEDEDEGDGAQ  
EEDDGPQEEGDGEQEEEDGPQEQEDGDQAKGDEGQENDDGGLENKVENEFRIGASDDD  
ELENDLSSNSSEPEAIIIEFFRAKFEDKFPRLDLSGCPLTASFRPWEPYIFRNSEEQPVDDYYY  
GLQGDEDDYNDTSPNYGESDDESADPGEDGDGAIPDTETQSGGKCLKSGIEYEMVQZIA  
ERLHVSIEMQGENSNLYHLFQQLIDGEIEMIVGGIDEDPSISQFVSSSIPYHQDELTCVAR  
AKRRHGFFNFVATFNADAGFLIGIFVVTCSLVVWLAQRVSGFQLRNLNGYFPTCLRVLGIL  
LNQAIPAQDFPITLRQLFALSFLMGFFSNTYQSFLISTLTTPRSSYQIHTLQEIYSNKMTVM  
GTSEHVRHLNKDGEIFKYIREKFQMCYNLVDCLNDAAQNEHIAVAVSRQHSFYNPRIQRD  
RLYCFDRRESLYVYLVTMLLPKKYHLLHQINPVIQHIIESGHMQRWARDLDMRRMIHEEIT  
RVREDPFKALTFDQFRGAIAFSGGLLLVASCVFALCYVKYVYRTEKREKTKKITKKVH  
NIKIQHD

>DmelIR94a

MALPKQLKFINIFLVLLIYGSSDGTENQHEIFLNRLQAVHNERSVETLFLHHSNLANCS  
LQDWNPPRIPTIRSNELTVFNVEKTFNHNAALVCLMKNSYREILNTLAKSFDCMRQERIL  
MIHRKSDSKFIEDITHEVKNLQFLHLIVLIVQEKYNGQVFASTLRLQSFPEPHFKRIRNVFAI  
QRIFYRPINFHGKVLNAIPNDIPILFVALNEMFTEYARRYNSTLRIQNRTIKEDIEITEDNYDI  
DMKIQLHNSQNFLHMHMNIAMDIGSNSLILVPCATELRGLDIFKELGVRTLTLWALLFYIIFV  
LVEMLFVFISNRFNGRNFTMRYTNPLINLRRAVRAILGQTSPISNRYSLSIQHFFVFMSLFGTL  
FGGFFDCKLRSFLTFRPYYSQIENFSELKSGVTVVVDHTTRQFIEQEINANFFRDEVPNV  
TTTIQELINHVYSYDRKFVANSIPWRTFREEMKSINQKILCDSKNLTILENVPLTFSIRRN  
AIFSHHLRNFIINAADSGMITCWFKMAGKVIRKHIKTTLRESEQQPSHLPLSFDHFKWLWA  
VLCIAYVMSFMVFMVMEILWSKYQRRTRSVSIV

>DmelIR94b

MSLIFNLLFILLSQAVSQETEFQLKYLNNIVRSMIKLHKMETLVIVKHHLNDCSLQNW  
NAHGMGIIRTNDQGKLIKDTFNSRTLAIIICIGQNSHITLLRNVFETFGKVQKKIILWTQM  
ELKEKFFQEISKSRDLKLLNLLVLKAVTKDKLLIYRLNPFPSPHFKRIENIWPNDTLFMD  
TKFNHFHGMTAVVKHDYNWTIQMGNIRKFPISRIEDKEVIEFALKYNLTLQFFNDVERFDIEL  
RKRILKSNSTQPIDSGIPMVFSSLLIVVPCGNYSIQDVIVKVSIEKWIFVYIILVYVIFVLEIT

FLGVTILISRQSRHQMIPNTLVNLCAFRAILGLPPETRRSLSLRQLFLAIALFGMIFSIFINC  
KLSSMLTNPQPRPQVNNFEELKTSGLTVVMDHDAENFIEKEIGVDFNFQYMPRKVTLTFTE  
RAKLLFSLKGNHAFTLFSESAIIESYQRSKGLRAHCTSEDLIVAERVPRIYILENNSILDRPL  
RRFIRQMQUESGITNHWLKNIPSSLEKNLMQITIPYDRERVHPLSIEHLTWLWCILILGYSISM  
IVFFVEMSLKRRKKNLENRAPNIC

>DmelIR94c

MSKVFKLLVLIYLSLTKGSKNPQLKFLRELINVIEEGREIRTIMVIKHSRDEYCHLDQWN  
PRGSPILRTNEMGSIRISGYFNDQAVILACMGENS DYGLLKSLANAMDNMRQERIIWLSER  
EPTKMLMDYISQQADRYNFAQIIIVTMNEDVDAVPSLHQLNPYPTPRFRQITNISNIRRTSFF  
GCGLSFQGKTAILKESVVS NIRFKVWSPSGPIPLSELKDYEIVQFAVKYNLSLKLYDQNESK  
SDHFDIQLGPLFITKDFPTQMAFVSPNTACSLIVIVPCSPKWRFMVDVLHKLGVLLKIGCLLI  
AYAVFVLIETLILWLTHRISGREVRLTSLNQLLNPRAFRGILGLPFPEFRSSISLRQLFLVISV  
FGLVYSNFVSC TLSALLTKPAQNPQVRNFKELRDSGLITIMDKYTHSFIEKHIDPEFFDHVL  
PHYLILQKKEALRMIWNFNDSYSYVMYTTTTWKS LNTVQKSFDERVFCESLTIAWNLP  
MYVLGNNSVLKWMLSRYITYMPQTGIPDSWTEQLPKVLKLLYNVTSPRRIKEGAVPLSIQ  
HLSWIWHLLFIGESIATLVFIVEILLQKSNQHTSNMRERSSEDDDFV

>DmelIR94d

MGQLHLLLVALVLLSPGGDSFYHSLIHHLNRELKIEYVLLLGNFDTTWLDILWQLPVSVLQ  
IKEHSRETYSLLENPSHNVLTIAFVNDS PEDILEILYRNLRLMLNTQPVLLVIRKSTIRVNSLLE  
WCWHHQLLKVVAIAQDFMESLIVYSYNPFPVLQFIERRLDNSTVIFEKRENLHG YEVPIA  
LGGSSPRLIVYRDLEGKLI FSGPVGNFMKSFEQRYNCR LVQYPFDESAISPARLIASVQN  
GSVQIALGAIYPQVPYTGYSYPIELMSWCLMMPVPEEVPHS QLYSMVFSPMAFGITIVAM  
VLISLTLSMALRLHG YRVSFSEYFLHDSCLRGVLSQSFYEVL RAPALIKAMYLVICLLGLLI  
TSWYNSYFSTFVTSAPRFPQ LTSYESIRHSNIKIVIWKPEYEMLLFFSENMEKYSSIFQLQED  
YKEFLHLRDSFDTRYGYMMPMEKWSLMKEQQRV FSSPLFSLQDDLCVFHTVPIVFP MVK  
NSIFKEPFDRLILDVTATGLLSRWRDMSFTEMIKAGQLGLEDRGHPKEFRAMKVGD LIQIW  
RFVGVMLGLATIVFLELICFWRHKMWQNMKYMFCRNKNI

>DmelIR94e

MDCPKWILSGLCLISLVSGATVIELLGT LKLELDFEYVLLMKNRNFSLS DQVWNGTSLTKD  
VMDEVQVPVLQFNENVS YFLHNSISRRLVTLGFMS DANLDEHRG LLTALVANLRHMTTSR  
VIFLVQSKASTDFLYELFRNCWRK KLLNVIVIFQDFETTSTFYSSNFPILQIEERIYETSLQT  
LPIFPDRLRN LHGYEMPVILGGTAPRMIAYRNK KGNVVYDGT VGHFMTAFQ QKYNVKFV  
QPLQAKNPLDFAPSMQTVGAVRNETVEISISLTFPTIPPFGFSYPYEQMNWCVMLPVEADV  
PPFEYYTRVFELAAFLTLGLTLVLISCLLASALS LHGYATNISEFLLHDSCLRGV LGQSFVEV  
FRAPTLVRGIYLEICVLGILITAWYNSYFSS YVTSAPKQPPFR TYDDILASKLKVVAWKPEY  
AELVGRLLLEFRKYETMFLVEPDFNRYLALRDTLDTRYGYMITTNRWVLINEQQKVFSRPL  
FQKRDDFCFFNIPFGFPLHENSVM EPVQKLIMELAETGLY YHWITTGFSELIDAGEMHF  
VDLSPHREFRAMQIQDLQYVWYG YAFMVVLSLVWLL ENLAYTVKSKTIFPTHFMQRNK  
K

>DmelIR94f

MSGMWQQVLLAETS NWFRSDVLQRFWTHLRVEIRFRTMLNYRLESCDCWFDNVLGSDN  
STALLWNDQTYPHYLRRRQD TDILVVSCLRFHQYQEVLLALSMLDQMR SMPVVLQ LCG  
DEDSMQELNSARLLLKHSQDLKMPNVVLLSSTFFTSATL YSYEMFPEFNVQKLVYQAYLT  
LFPYKLG NLKGHPRTVPDNSEPLTIVRKT LNGSIAIDGLVWQFMIEFAKHINATLQLPIEPH

PEKSIKLVQILDVLRNQTVDIAASLRPYSLNVQRSSTHIYGSPMMVGNWCMMLPTERVIGS  
HEALTRLMKSPWTWLILLLFYSVHRFLAQKTRLRSSLIHLIKLLINLSLICFLQAQLSAYFIG  
PQKVNHISNMQQVEESGLKIRGMRGEFMEYPIDMRSRYASSFLLHDLFFDLAQYRNSLNT  
SYGYTVTSVKWELYKEAQRHFRRPLFRYSEEICVQKLSLFSLIQQSNCIYCYRSRIFILRMH  
EAGLIRLWYRRSYYVMVTAGRFPIGDLSTVHRAQPIRWTEWQNVVLLHGVGLLFSVVVF  
VIELTVHYANVCLNNL

>DmelIR94g

MSTAVNSVHSKLVSLISRGQELTSIFFYAPAKEKCHLEDTISSATWGLPLVIWRDRTVILNG  
FIGEGLLVLAACLPGFHWRALLGSLARSLKYLRQARILIELMQDRDEFVLVSEVLQFCLSQDM  
INVNAIFDDFPETENLSSFEAYPSFEVVNQTFTPDQTQVSDLYPNKMLNLRGGVIRTMPDYSE  
PNTILYQDKEGNKEILGYLWDLLEAYAHKHNAQLQVVNKYADDRPLNFIELDDAAQSGII  
DVGASIQPMSMGSLSRMHEMSYPVNQASWCTMLPVERQLHVSELLTRVIPYPTLALLLLL  
WIFYEVLGRWRRHRSRLQSIGWLVLATLVSSNYVGKLLNLFTDPPSLPPVNSLAALMESPV  
RIISIRSEYSAIEFTQRTKYSAAFHLALHASILIGLRNAFNNTSYGYTITSEKWKIYEEQKRS  
KPVFRYSKDLCFYEMIPFGLVIPENSPHRAPLHSYTLRLRQAGLHDFWVNRGFSYMVKAG  
KINFYAVGERYEAKTLTITDLRNVFIIYVSVLLISLILFTCELFVSWVNYWLG

>DmelIR94h

MLSNISFSSAPELVLDYGLVLKFLVSSETTLFYFNPTGQKCSWETLPRTILSNHPQIIWFREE  
TYPGLYKRHSSNLFVMACLSSTSYDQQLQLLAESLTRYRSVRVLIQVQDKEGSFLASQILL  
LCQQHSMNLNVVLYFSRWTRTLNVFSYLAFPYFKLLKQRLSGSLRPKIFINQLKDLQGYKIR  
VQPDLSPPNSFSYRDRHGECQVGGFLWRIVENFSKSLKGDQVLYPTWAKAKVSAEYMI  
QFTRNGSSDIGVTTTMITFKHEERYRDYSYPMYDISWCTMLPVEKPLSVEILFSHVLSPGS  
ALLLILAFILFVLPQLIKCLGITFRGRLIGMASRIFALVMLCSSSAQLLSLLMSPPLHTRIKS  
FDDLTSGLKIFIRSELYFLDGGFRAKYASAFHLTENPNELYDNRNYFNNTSWAYTITSVKW  
NVIEAQQRHFAHPVFRYSTDLCFSSETPWGLLIAPESFYREPLQHFTLTKINQAGLITQWMT  
QSFHEMVRAGRMTIKDYSRTNLMKPLRIQDLRKCWVIFAVGLGTSTVVFTEILLIYTNVF  
LNSL

>DmelIR100a

MATTQLIMLALVGGTLGQANNTDHKQVLTIVKQLEGGLELHLRTSEDGGNDLVQFLM  
QEKSSIIISAKQEEVPSRAKIMRHHFFIFDGVHQMQEIRTSFNFDGFYILALENTIEDDVL  
LMEFAADVWLQHGHSRIYVQLSKKSVLLFNPFQLRLVVVQDSKTYSRKYDLEGYHLRI  
YIFDSVYSSVIGDGENKVLSTGADAKLAKTVARQLNFTADFWPDEFFGGRLANGEYS  
GGVGRAHRGEVDIIFAGFFIKDYLTTHIQFSAAVYMDLCLYVKAQRIPQSILPLFAVHMD  
VWLCFLLVGLL GALVWLILRAVNILGIEGVPDGSRATRISYFGAARRIFVDTWVIWVRVN  
VGRFPPFHSERIFVASLCLVSVIFGALLESSLATVYIRPLYRDNVNTLREDESQPPIYIKHPA  
FKDDLFGHNSEVYRRLDAKMMLVAEGERLIEMVSKRGGFAGVTRSASLQSDIRYVM  
TKKVHKIPECPKNYHIAYVLPSPYLEEVRNIVLRLVAGGIVGLWTGEAKERAKWISIQRF  
PEYLAELDVGRWKVLTLSDVQLAFYALTIGCLLSAIVCMAEILLGRQRRLHSPK

>DponIR56e.1

MAYNYNQGPYAGQQQPGYGPQPGVYPPPPQGYPPGGYPPQGGYPSAPQPGFQPPPYGDP  
YGGANQGYGGYDAEDPEVKGFDFSDQSIRRGFIRKVVYSILMVQLAITMGFIALLCYEPT  
KAFVHNTPSLFIVALVVMIVAMITLACCGEVRRKAPINYVMLFIFTIAEGFLLGVSASTYKQ  
DAVLMAVGITAAVCLALTLFAFQTKYDFTMMGGVLLVAVIILLVFGIVAMFVHNKIVQLVY  
ASLGALIFSIYLVYDTQLMMGGKHKYSISPEEYVFAALNLYLDIVNIFMYILAIIGHARD

>DponIR75x

PAAKSIRNVIYSRRRAFLDKVRLHKAILEENLNMRVVFAKARVDAFENINTKRYEKFTYFL  
DMQCPDSADILDKASNVNRFKGFYFYSWYLLSKVNQELEDIFHIFTRFKTRMDMDVKVL  
AVDDFGRFEVSEIFNPGINVLTRRIGKLQNGSVIIDKNWSYYESRMNMTGVLIRSANVI  
RYPFTTSFDEYMTDPKLMKYDIYSKFHYQLFQGLVHHGFYNTSLPFSWFGNTSSGEDG  
GLAKMLWDDTIDISSAGCILRLDSDRIDFYDYIMPYYKFRSCFFPQRSRKAELLRSIKAV

>DponIR76b

MGLMEVVLTTLATLCFNSTCVDQDLINASKQRLAHLKEELKHETLTVTTLKNGPLSGYEI  
VNNTVIGTGVAFEILNIVQREYGFKNVIVPDHDSFEPVNGGEGGVRNMLLNETIDVAVAF  
LPQQYTDVVSYSRSLDTAQWVVLKMRPKESASGSGLLAPFTATVWSLIISLLGVGPILWL  
TILLRARMCKEDHDIVFSLPSCMWFVYGALLKQGSTLNPRTDSSRILFSTWWIFITILAFY  
TANLTAFLTLKFTLPISEPKDISRKHNKWTNRNGNGIVEQLYLSKKYANGDGNSLFEEIGM  
PQWEPDVEDTMLSTYVIKQNM MYIREKTVLESIMYEDYKVKTKADVEESKRCTYVITK  
FAVCVFPRAFAFRPGFKYKELFDFTIQHLSSEGITDFQQRKSLPDTTICPLDLGSKERRLNS  
DLAMTYMIVGGGLIISTIFAVELIYYAKMHC FNKKS HVNNNTLVTQSNNGLFVKNHQH  
QGNFRASKQFVSPPPSYHTLFHPPNLTNGEYKNKTINGRQYWFNDKQGMTSLIPQRTPS  
ALLFQFTN

>DponIR75sFIX

LVVLYFLRKWEFAKIKQQELLHKTAYPDVVFITIGAVCQGAATLPHSVPGRIATLWLFVSL  
MFIYVSYSANIVALLQTSSNSIRTLEDLLKSRIPIGVDDTIFNHFFFTTTQEPTRRALYEKKVA  
PPGKRPNFLSIEEGVRRMRQGLFAFHMETGAGYKIVGETFTEDEKCGLQEIQLQVVDPW  
LAIQKNSSYQELLKIGFHLLRETGIQQRENNLIYTKKPCSSKSSSTFFSVGLVDCYPVLIFA  
EGLAAGLALFLELYIHKKFSNQ

>DponIR75p.2

MANFRQHNFHFKGQTRLFPHQQLRSGYQRINRQNLSDSSPVPKELLELFGKLHSRLVRRS  
GLYLLQPANFDKNRTNFHKMPLKVITYVSDNHSLDHGIYDNRNKHIDKATKINYIMYEYF  
VDIWNMSHEVVVTNEWGQEFHPSKLYYKGLLDGDLGKADAAAGTVMFTPTERLKYFKF  
LVSTTKEMSLHFIFRAPPLPYSHNLFALPFDTNIWISCAIVLSLGLVIWIIMSWEAKVASFA  
ANRQMHNENAASFLDIVMMQIGVVCQMDYFHEPRSTAGKIATFSLLLGFSYLYNAFCARI  
VLLQATANNLHDYKALYEAKMDMGVEATS YNIYF SHPNSRTNEDYRKL IYQKKIAPN  
NKFLPATDGMRLVQNSYFAFHVELTTASDLILATFNNQEKC AVRKVN SIFKEDKPYLSPIN  
STVTEYLMIGFHRLFETGVHSRESRRRFNKLPPCRGRNSAFISVGLIECYFAIEIFLIGFTLCL  
AFFLELASGVYRKNQST

>DponIR75p.1FIX

MSWTILCFLKMFSVCLSSSPAHADTDISFLFDLQQTNRPNYAVLENVCWSKEETQKLRH  
NLTMQNFKCKSV DGNSTIMTERYYEHSYIILVHVDCDFDTIWKQAAKGS LTFYPHIWILLG  
DFEKIKKKNVHIPMNSLLLSLVRTANYTKLETAYKIKKTVDWYIERTVGNWSPKVAMFDL  
EKNIFKDRGNFMKVPLRVTYIITDNSTVNHFDYRNKHVDNLTKINYVLYILIFDILNATQI  
RLFSRGWGFESRENNGSFASGMFQDLANDRSDIAGTLAFTPSSRLKYFRYIYPPAKDMDIC  
LVFRAPSLAYYTNVFGLPFNWVWVALGLQLLGCVLIFIFKWEWKVAQGRKENGPSFL  
DTAMMQIAIACQQDFFHEPKSISGKMATLSILIFFTFIYTAFSAKIVLFLQLSTNKINDVGSV  
YAAGFDFAVEDQPFNQY YFKGPSDRAEEQLRKQIYEKKIRRS HGDQFVSAEKGIQLVRDTF  
CAFHVERTVAHYLVDKTFSNNQKCSLRFVRSIFKSDMPYLSIPWNSSYIKYFIISFRRLAET  
GLQDRECKRCYAKKPSCEGKANTFVSVGLIEAYFP LLIFGVGISLCISILILEKLVHKYIKLH



>DponIR93a.1FIX

TKWTIEAGETWGREYQMLDEATNAELLAVGTWRPSDGPNMIDALFPHVAHGFRKLLPL  
VTFHNPPWQILKTNSTGDVVEYGGIVFNIIKELSKNLNFTFN VATVKPQSLLNASTLQSPKG  
DTDSSANFNNGNSYITTYRVPHSILEMVHNKSAALGACAFTVTEENQRVINFTDPISIQAYTF  
LAARPRELSRALLFISPFRTWCLCSATIISMGPVLFYIHKLSPVYEEKGVRCKGGLATIQ  
NCIWYMYGALLQQGGMHLPYADSARIIVGSWWLVVLVIGTTYCGNLVAYLTFPKIEVPMT  
TIDDLAHKEMVSWSYAKNTLFEARLHNSVDKSFNIIFKDAKNIWDRKAMMGEIKSGKH  
VYIDWKIKLQYMIKEHFIDSGECSFALGVVEEFCEEQIALIVAPDTPYLHKINEEIKKLHQVG  
LIQKWLSDYLPKKDKCWKKKRTIEVNNHTVNLDDMQGSFFVLFIGFLIAVIVISLEMLWSR  
KVTNNRKRKVHVFVT

>DponIR64aFIX

MDNGIDVQNHRETSDTSWSLSTICTFGVFCQQGIISVPRCLGGRTSAIVALWCGLVIYQFY  
SASLVSFLLNVPVNLSTVQDILDNGFDVGYERVLYAMSLKKAATNPAAQEVYRRVSNKN  
QTGYLRREQGLELVKNGRYAFHVELVTGYPFIEQHFDESMICELKEISLFPAMYMYSGYQ  
KWSPREFLDACLRLEENGVSRELYFWHPRKPQCMRSRSTI

>DponIR21a.1

RKVDYVPDVESGLRNVTKAFFWPYALLGSREELQFIVKTNFSLGSKKSMMLHISQOCFVPF  
KVGIALPHHLVYSEILAGGIQMILQSGLNKMKNDIEWEMLRSTGKLLAANSRSGTLTILS  
RDDRALTLDDTQGMFLLLAIGFLAGGGVLISEIFGGCFNLCKKIDNSRATSSNSSIPS NPRFH  
ERQTIRERNRSISLASFQQRHNSIQSEIAFEKAQAEHHQGGVLECQIHGTPDQNSQGVVL  
EETNADIDYNEQISKLFEQALGEETCGSRPLRA

>DponIR93a.2

MWVRLVICLGVFCKVTNSDIFPSLLTTNASIAIVIDRNYVVEEYEPISKIEDYLVYAKREIL  
KHGGVNTHLFAWSAINLKRDLTFLLSITCTETWKLFEADTESLLHIAISEQDCPRLPQHS  
AITIPIIDRGQDTPQLLLDLRTVGIYKWKQVVIIYDNTITNDLLTRVIKSMKQVNRIDASGV  
SLVQLAKKVSTTRDVIIANLRTELSKIDPRIMGNFLVIVSYELAAATIMKCAKELNMVNTQ  
TQWLYVISDTNSSTKSMNRFKTFLEGNDAFIYNTTDVKNVCLGGTICHTTESITGLMKA  
LDSAIMEEFQMASQISEEWEAIRPTKNERRKYLLRKNSEYLSDYGTCDNCT

>DponIR75q

MNTLYFGFFMWFALICGGHCGVHADDVLLIEDLLDFYRFSKKVYTHVCWDKELQLHLP  
RFALHAKYHEFQSTKSQVVILMDMSCKGADFFLENMQRNLLTPRVILLINPAALTPHYF  
PVNSNALFLKPSGEGFAISKIYSGVSNVTIGTWTKTHRYIERPIAKKKLRATNLKVCYLVGD  
KHEGLESSEYQPVAEATTKLNRVLEEDGIRMINSTKTDAFQIGSGEPELVNDLIAGKCDIGG  
TPLALTAEKIGRLDVLAKTLREDKTFVRAAPHSYISNVFTLPFDSYVWCSCFGLMGVIFLI  
VHLVVCWEWKDPVFKLNLQPNISLRPNPVDILLMEVGSAAQQGFEAEPRSNSGRIVFMST  
LISFMFLYTSFSASIVALLQSTTDSLNTFDNLFQSRINVGFQKQNISLDFNDLKHQP NRADY  
HGKLKEPQFFTLLEEGVKRLQNDFFAFYAETSEVYRYINRWFQSEKCSLREIPFKNTHINH  
WLFMGKNSQYRDALRIGMNSIQERGIRSREYKRLFPLKPFCDSIGGNFESVGLVDSYGAFI  
IMVYGVALSSLLFLEHMSLQYNLSTKAGRIRNRIFNSIHRGDE

>DponIR41aFIX

MGSEMKILETFSQYVNASISPVINQADYWGIEIWNWSGSLMGNLVEDKADIGAAALYT  
WEFAYEYLDLSKPTVRTGITCLVPAPKLSAGWLTPFRVYSLEAWMALIGTLALSFLALYAL  
NKLQISVKPQLKSKHHINQLKGGKLLSKTLM SVSKPFV MQSITNKEMAQGNLAKYLMGLV  
FLSTLVLSTTFDSGLATIMTVPRYDNPINTIEELAESGLPWGGTQDAWILSINNSLEPNLMK

LVARFVAHSEANLRKYSLGDQFAFGVERLPNDNYAIG

>DponIR56e.2

RADLTSITSARNMWKKVLLAAMLTTTSQVDFSSIEFIEAVGRNRRATVFGCSRKDLVETS  
KLLSEKNFESNWISEWSSSDGRIFHKSRIHFLVNLNCPETMRFLKQAQQWKLFAFPFRWIA  
FHQATKTPLAIEKTFRNLSILVDSDFNLVTHQNNREISYRKIYKKRIDESTFEVEDFGLWRQ  
NSYFDRQTSSLNDRKNLGTVLKACIVITHNDSLHLEDKRDKHIDSIKVNYYVLVLTMASI  
YNISINFSVTNTWGYKDNNSQ

>DponIR25a

MKNNNIVAGGFFSIFLLNVADICGQTTQNNVIFANEEGNFVADKAVTVALNYIKKTSKLG  
SVDLRRVVGNKTDSONVLDLCAAYQQMLDDNNPPHLVLDATRAGLASETVKSFTAALG  
IPTVSASYGQQGDLRQWRNLQPNEEEYLVQISPPGDIPEMVRTLVLNQNITNAAILFDDSF  
VMDHKYKALLQNVATRHLIDEINEDVNKIPDHLESV KLDLKNFFVLGSLQTIKNVLEAA  
EKKSLFNRMFAWHVLT KDPDDLKASIKNATIIFAKPIVNNLYQDRLRNIQTTYQLSSVTPEI  
EAAFYFDVALKGFLAVKEMLLDGSWKKNNVTNYVTCDDYEPKYSKRFNLNLSYLQK  
ESSEPPTYGPF AIESNGMSFMESMALS AVYVRSGASDKSLPLGTWHGGFNMMTLTPK  
DMKNYTADVYKVVTVVQKPFYRDDTAPKGFKGYCIDLIDEIAKILHFDYEIDAVADGM  
FGNMDENGKWNIGI KDLIEKRADIGLGSLSVMAERENVIDFTVPYIDLVGITILMKMPETP  
TSLFKFLT VLENEVWLCILAAFFTSFLMWVFDWRWSPYSYQNNREKYKDDEEKREFNLKE  
CLWFCMTSLTPQGGGEAPKNLSGRLVAATWWLFGFIIIASYTANLAAFLT VSRLDTPIESLD  
DLSKQYKIQYAPVNGSSTMTYFQRMADIEAQFYEIWKDMSLNDLSLSDVERAKLAVWDYP  
VSDKYTKMWQAMKEAGLPPDLDTAIERVKKS KSSSEGFAYLGDATDIKYLEITNCDMAIV  
GEEFSRKP YAI AVQQGSPLKDQFN TAILQLLNRRELERLKERWWNKNPEKKQCEKADDQ  
ADGISIQNIGGVFIVFVIGIGLACITLAFEYWWYKYRKNTRVTNVAEAPNSRHHKVGGVQ  
KGFPRQFEGESDMKITKLYPKTKF

>DponIR8a

MHVLGLFGAVACVLSVRGQQFKIVTLHQPDQAAEVKYFENAFLKVNKDEEIAFLDVLLN  
EDES GHYKQICDALSTGFSLILDFAWSGTEVAQDLTSNMSLPYLHVDVSVAPFLVLLDSYL  
DSRNSTDVVVVFDKEEYIDQSLYWLDSVRLRLVMADALNRSTASKIESIRPIHFSFAIVAS  
AKNMNKLVSQALNEDLMSLSDRWNLVFTDFETGIFDKSLFQNQTPSLMYLPKPELCLDL SI  
QSRCPSNFVLKEQFLYWLAWGLSRLAKMAAEESLEFPEKEFQCGKTTFS EDTKERLGDML  
DSIVADNSNVLSLTGRSVKVAVRGNVEKMINGSFQTIAQYTNGKLTPEPGKQIDPIRAFYRI  
GITHAIPWSFKAQNLQTGEFYWTGYCADFAQKISEVMNFDYVFVEPATGTFGEKVNGTW  
DGIVGDLAVGETDIAITAVIMTADKEEVIDFVAPYYEQTGITIVMRKPVRKTS LFKFMTVLK  
LEVWLSIVGALIVTGFMWFLDKYSPYSARNNRKAYPYPCREFTL KESFWFALTSFTPQGG  
GEAPKALSGRTLVAAYWLFVVLMLATFTANLAAFLTVERMQAPVQSLEQLARQSRINYTV  
VQDSETHMYFINMKFAEDTLYRMWKELTLNASTDDTRYRVWDYPIREQYGHILLAINDSN  
PVANASEGFRITNEHL DADFAFIHDSSEIKYEISKNCNLTEVGEVFAEKPYAVAVQQGSHLQ  
DDL SKVILD LQKDRFFEQLQAKYWNDS AKGDCPSTDDNEGITLES LGGVFIATLFLGLALA  
MITLAGEVLYYRRKGKKIKPKKRKAKSKNLPLNTAGL KLSKLDGQSVDMFNVNKTVTIG  
TTFKPVNLKENLT KEMETVHISHISLYPKARNRIPRVE

>ItypIR75s.2

STGGAKCLSVTLQCAWTICHVDFIHHINVYVRVLLGQYSGIADIVKQYKNSGRPFKLQNS  
FRSRRHGFQSLFLY YYYRTNQEGLPKKGGATGQKPNFMPIEDGIKRMRQGLFAFHMETG

SGYKLVGETFEEAEKCGLQEIQLQVVDPWLAIQKNSSYEEHLKIGLRLRHETGIQQRENN  
LIYTKKTDVL

>ItypIR75p

QSRFIAEREMYEENAPDFLDIVLMQIGVVCQISYSFKPRSTAAKIATLSLLVGFVYIYNAFC  
ARIVILLQSTANNLNKYKDLYYSKIDMGVEEAPYNKYFSPNPNRANEAWRKLIIYETKIM  
SKNKHPVIFYSTAEGKLKVKQSYFALHVEYTTATDVILATFTNEEMCAVRVIESIYKEDVPYI  
SCPVNSTFTEYLLIGFHRLFETGLHSREARRKFSKLPKCIGRNSIFVSVGIIGCYFAVEVFLV  
GVILSLVIFAVELV

>ItypIR25a

RGNREKYKDDEEKREFNLKECLWFCMTSLTPQGGGEAPKNLSGRLVAATWWLFGFIIIAS  
YTANLAAFLTVSRLDTPIESLDDLSKQYKIQYAPVNGSSTMTYFQRMADIEARFYEIWKD  
MSLNDSLTDVERAKLAVWDYPVSDKYTKMWQAMKEATLPPDLETAVERVRKSKSSSEGF  
AYLGDATDIKYIHMTSCDFVVVGEEVSRKPYAIAVQQGSPLKQFNSAILQLLNRELERL  
KEQWWNRNEESKQCETSDDQQDGISIQNIGGVFVIFVIGLACVTLAFEYWWYKYRKNS  
NITNVIVSDPKHRRVAGFPKDVGGKANEGELALRPGKLYVKPKY

### SNMP sequences

>CbowSNMP1

MRFPVKLAIGSISAFIFILVGFVLFPRMITSKVKGMVNLAPGNEIRDMFIKVPFALSFKIYLF  
NVTNPMEIQSGEKPIVKEVGPFCYEEWKEKMNIEDKEEDDTISYNQKDTYLKKWWPGCR  
NGQEEVTIPHPLILGIVNTVARQKPGALSLINKAIKSIYSDPSSIFLTAKVDDILFDGVVINCN  
VSDFAGKALCGQLRTAEALTKVGEVEKFSLSKSNATLQKRIKAYRGKKNHRDVGRIVEY  
NSSKMMDVWPTEECNSIEGTDGTIFPPLTKPGEGLFMFSPDLCRSLIAFFVRKSTYDGIPCG  
EFTADLGDMSKNEKEKCYCSTPETCLKKGMMDLYKCSGIPIYASFPHFYNSDTSYLKGVG  
GLSPNKTKEIKILFESITGSPLYARKRLQFSMPLESTQKVELFKNFTGTVLPIFWIEEGVGL  
NRTYTGQLKSLFTLTKVVKVSKWLILIGSLGGLAAAGYLFFKVDGRADITPVHEIRRHESK  
SGSTVNGAGGHVLSGNLEKY

>CbowSNMP2

MKMGASRFCNVKILFVTTVVATVVLIGVLLLSFVGMPLIVNDQLAKKLRLENNTEQWD  
RFVELPVLNLNVFVFNVTNSDEVNTNKAATPILQEIGPYCYEERITRKILSANSTEDSITYEQ  
SFNITFDEKRSGQWKESDKIVMVNPLFLILSQITNVIERFVVMGCIDKLFPPKYSTMFFEVD  
IKTIMLEGIEFGVASDDIGPACNIVRNKLEKTLPMKNVERIPSPTDPSVINSLKFAFLQYKIR  
GPDGQYTTNRGIDDITQLGHIMRWDHSAEIDVWGRGESTNNATCKEVKGSdstiYPPHVT  
KSTKLDIFSTDICRTVQIRYKGTGTYYGDSGYFGIDENTFRPATPSPENDCYCIQQTMAPD  
GEPSCFLDGVVDVYPCFGAPILLSFPHFYADESYLDGVIGIDPPNSSIHEIFLLIEPNTGTPL  
QGMKRIQLNVVLRPVEFVEYTANLPSTVLPWIIEEGVNLSQDLLDKLDMYFNVIKAAAD  
AAKYAAIGVLTAFVLISGGFFVRKRYFK

>CbowSNMP3

MKFYSVLFVVKDRANMLNKFNITVSGKIIIVILGVFGLFCIFAGFYVGFKAVPDVITDKIWD  
MKVLKENTEQWGMFMKTPFPFTFKVYLFVQNPQEILQGAKPVLRETGPFVYKVKWK  
SEVEWDTDDISYFSYMRFEFDRKASGIFSEDMKVTLFNTAYYGMLQKIDETQPEVLSTVE  
GVLPSIFGENHGLFIKVKVDYLFDFGLKICENEGKDGGFVAGMVCKQMIARLPESKNLRL  
EDNSILFSNMHYKNNTHQGRFTVKSGGQNRTEATLTLFNGKSYISSWTGEKSMCNKIRG

ATTVFPVNIENMTFEAYSEDICRTIPLEYSAEETVKDIVGYKFSAMNDSFSSTKKENFCYC  
TNTTRTLGDGEYGCLKDGVTDLKTICIGSSILVSFPHLLYGDEEYLDVIGLNPEKSKHETTVI  
LEPISGFPLSVTQRIQFNTFLRPIDNVISLENVSKSLFPLLWVEESLILDDQYTDMLKNELFR  
TIKIVDIVKWVTIGSGAACVLIALILRMSKTT

>CbowSNMP4

MRLPLKLGVAGFLLILLSVIVGFIALNPVRFIRQQTALKRKSEIRNIYLKLPFPLDFRVYFF  
NISNPMEVQKGATPILTEIGPYCYDEFKEKIDVLDNDAEDSLTYYPYDIYKFNAEKSGKLS  
TDYVTILHPALVGMVNQATRDSALLSIVNKAIGPIFRDPESIYLTAKVKDILFDGVELNCK  
VTEFAAKAVCTQIKSQIPGIKSDPEKSIFLFSLLGVKNATVGKSIKVSRRGISNSRDLGKVF  
DGKKVLKLWYEEQCNHFKGTDGWIIPLLKPEEGLWSFSADLCRNVVAEYVEDSVTKGV  
KTRRYEATLADMQNNEEDKCYCPTPKTCLRKGVFDLSKCMGVPIALPLPHFLEADEIYLQ  
QVKGLNPILDKHIIRIQLEPMTGTPIEARKRLQFNLPVSASEKITLMRNVSTSLHPIFWIEEG  
VELDGALLEKVTEVFTFLGVFQVFRWLGLLIGFVSIAYAVYHHMKHSRSVHITPISGSSSSD  
HVDINRSTNELVGKMKVEVFQSDKGHTNPVMTGHEFDYS

>DvalSNMP1

MSQHQTPLFKGMVNLVLRDSPVFLPIVSKAIPSIFDNPQTIFLTAKVKDILFDGVELNCSGK  
EFGTTAVCSQMKSQIPGLKFKKDNENIFLFSLLGSRNGTLTRRLKVHRGITHAKDLGRLE  
LDGKKEINIWREAECNRFHGTGWFIPALTTPEEGLQSFSTDLCRSITLQYINDTVLKKVPV  
RVYETDLGDQMTDENEKCYCRSANSCLKKGVFDLTKCMGVPIYATLPHFLRTDPSYINLV  
DGLAPSELLHAIRVYFEPMTGTPLFAAKRMQFNLDLQPTNKIPLFSLPIALFPMFWLEESV  
DLDGYLLKKVQ

>DvalSNMP1a

MPKLTLSFVFFPKLHLLALFTKFAYRCGKKQSPEKNMNFPMRLAIGSACSVVFILVGFV  
GFPKMIKGVKDMVNLKPGMEIREMFLKVPFPLSFNVYIFSVLNPAEVQGGAKPHLKEM  
GPFCYNEWKTKINVADNEGDDTISYEPVDTFKNAKRPKCLSVDTQVTIPHPMILGMVNTIL  
RQKPGALTLANKAIKSIWSNPSSLFITVKAQDLLFNGVVIHCGVSDFAGKAICTNLKAEPSL  
THLGGDDLGFSLMGPKNGTAGKRIKAFRGTQDFHKVGRIIEFEGKPKLDVWNSKCDIAV  
GTDGTIFPPMLKKEEGLASFAPDLCRSLIAQFEKHDKYDGIPVSSYFATLGDQSRNPTEKCF  
CTTPETCLKKGLMDLYKCAKIPLYVSLPHFYDSHESYLKGVKGLKPDVEKHGIRIMFESLT  
GSPVSARKRLQFNMPLEPNPKVELFHNFTPTVLPFWVEEGVDLNTFTKPLKTLFLTKKL  
VNVVKYLVLMMSIGGFCAAGYLYFKSDNSMNVTSVQKVQPDQNGHRNIISTVFNGNHTA  
GQDNEAYEDKH-

>DvalSNMP2

MKVPFPFQFKVYLFIVENAEIQAQGVKPLVKEQGPYVYQLTRWKDQVAWNHSTDEISYHE  
YEAYKFDAESSGGLSEQDLVTVLNPFLSFLYTAEMDPATRDFLPLIDESLDAIFGSYNPFF  
TNITVREFLFDGLRICKNGCNDDGFVAKMACNKIKERMAVTKQMRADGTDILYASFHYRN  
NSHQGYITVAAGQKNETTIGEITQLNHQSTLNVWTKDQFECNRVSGLTTFVPTNVGVDTT  
FQSFSEDICRTVSFEYSRREMVGLIKGNRYEALKSTFNSTKNACFCTDRTRNFDGNVGCY  
NGVLDLTTCCQGAPVLVSFPHLLYADSRYLKVEGLNPDPKHAMFVTLPTSGTPLKVAK  
RVQFNLLLRVRNITSLETVGNSIVPMFWIEESTALPEKYQDFIKNKIYRTLLIMDIVRYTVL  
ALALAVIVCCIVLFIYAT

>DvalSNMP3

LLLHAVDIMQYLMIIIIGCGCVTIAMYFRLKNRKSVTITPATGTRKSAPPKPNEKMDVSNLSI

AGILGDRAEKKP

>DponSNMP2

MFRNCCSPRLVFLYNLLAVLLLIASLVLAFWGLPQIISKQIHKQTELTENTDQWDRFKELPF  
PMEFNIRFFLVTPADVLNGSMPILKESEPYKYKSTIKRTDIRFDDIEEDSVTYRRSFSFEFD  
GSGTTREDDSSITVINPLLMAFQLTNDIQRLAMAGCRKYILEPAGLDQVFLTTTVRKLLED  
GIYFGFQONATGKGVACEMVRKELGKIVANVRVVEHLNDTDCYRLAIFNYKTDNFKNSPD  
GIYTINRGRNNATALGSIMRWNGATTSTTYGTSTSIINNLTCHSIKGTSTIYSPELKAGENL  
MIFNTDLCRTIQLVQVSSNEVFNGINAFRYSTGYTLFRPETILKENDCYCSHGTKGADGKP  
SCFLDGLLDFRCLGAPVLISQPHFLHADVKYIRAVSGLSPDEDKHDIYLLLEPNTGTPLEG  
RKRVMQNSVLRQPLLSMITPPNMYEAVPLLWLDEGFTLPQKYLDDLNAKYFKTVRIAT  
GFKFGFIAVALALLVGCLFVACRKMFRNAK

>DponSNMP1a

MNFPMLAIGSACSLLFILVGFVGFPMIKGKVKDMVNLKPGMEIREMFVKVPFPLSFNV  
YIFSVLNPAEVQGGAKPHLKEMGPFYNEWKTKINVEDNEGDDTISYDPVDTFENAKRPK  
CLSVDTLVTIPHPMILGMVNTILRQKPGALTLANKAIAKSIWSNPSSLFITVKAQDLLFDGVV  
IHCGVSDFAGKAICTNLKAEPSTHLGEDDLGFSLMGPKNGTAGKRIKAFRGTQDFHKVG  
RIIEFDGKSKLDVWNNSKCDTIVGTDGTIFPPMLKKEEGLASFAPDLCRSLIAQFDKHKDKY  
DGIPVSSFFASLGDQSKNPAEKCFCTTPETCLKRGLMDLYRCAKIPLYVSLPHFYDSHESYL  
KGVKGLKPDVEKHGIRIMFELLTGSPLSARKRLQFNMPLEPNPKVELFHNFTPTVLPFVW  
EEAVDLNSTFTKPLKTLFLTKKLVNIVKYLVLMSIGGFCAAVYLYFKSDDSMNVTSVQKV  
QPDQNGHRNIISTVFNGNHTAGQDNEAYEDKY

>ItypSNMP1Fix

MPHPKNIAWAGGALAFGGVLFKVVWLFVLRVFGVKDQTALRYRNEVRGIYKIPFPLNFK  
IYFFNVTNPEEIQNGAKPVLNEVGPHYWYDEYKERVVIDNDTEDSLTYTPYDLFKFNPNM  
STPLSDNDYVTHHPVIVGMVNLRLRDSPLLKVVSKAIPFIFNDPKTIFLTGRVKDILFDGV  
VLNCTSKEFASTAVCGQMKGQVPGLKPTPGQPNLLFSLLGPRNATRTGSLKVLRGIKHFQ  
DLGRLLEVNGRKSIGIWAGDQCNRDGTDSWIFPPLIQPESGLKSFSTDLCRNIKMKLVNE  
TVVKKIPVGVFEPTWGVKVVTRRKSATVPTLPVXXXXVFDLTKCMGVPLYATLPHFLDT  
DPNYLKLVDGLKPDHEKHRIVVFFETMTGTPLKAAKRMQFNLELQQTNKLELFSKLPAL  
FPIFWLEEGMELEGYFLKKIQTVMFLLLFADVTIYVTIATGLSVCGAGFYQYWKNTKLSI  
TPLTKNNNGLSEPKN

>ItypSNMP1aFix

DLFKCAGVPLYASAPHFYDCHVSYLKGVRGLHPDEQKHAIKILFESLTGSPVYAKKRLQFN  
MPLEPNQKIDMFKNITPTVLPFLWIEEGVKLNNTYTKPLKSLFMMKKIVGVVLYLILGSI  
AGVTVGVYLYFKSGDTVNVQ

>ItypSNMP2Fix

MRFLQRVKFNLKTVFLCGISGVSLLVVALFLGFIFPKVVNDQLETKILREDTEQWAIFFKI  
PFAFTFNVYLFTVENPEEILKGAKPVVKEKGPYVYKLYKWKEDIWNYTTDEISYYEYEK  
YVFDQEASGSLTEHDKVTLNLPYLTFLYTAEANEATSGLPLIDEALEFIFSGHNSPFLVNV  
TVRDYLFEGVEICKNGCEDDGFVAKMACGKIKDNLKVAQMRLHKKDILFATFHRYRNT  
HQKYLTVNSGRQNHLEIGAITQLDNSSTMNVWNQFGCNQVSGLTGIFPINLGFKT  
TFQSFSAEICRPVKLHFSTIKPFGSIKGYKYVALNTTFNTSMVENQCYCTGKIPNLDGNLGC  
LYDGVLDLSTCLGAPIVVSFPHFLYADWRYVNNVKGLSPNETNHQIFVNLEPISGTPLEAA

TRIQFNLFRLPVRNITSLDSVADALVPLFWIEELTYLPQKYQDVITGKLYRSIFILNAIKYVLL  
AIALVIITVCILIFLYTD

>DmelSNMP1

MQVPRVKLLMGSGAMFVFAIYGWVIFPKILKFMISKQVTLKPGSDVRELWSNTPFPLHFY  
IYVFNVTNPDEVSEGAKPRLQEVGPFVDFEWKDKYDLEDDVVEDTVSFTMRNTFIFNPKE  
SLPLTGEEIILPHPIMLPGGISVQREKAAMMELVSKGLSIVFPDAKAFKAFMDLFFRGI  
NVDCSSEEFSAKALCTVFYTGEEKQAKQVNQTHFLFSFMGQANHSDSGRFTVCRGVKNN  
KKLGKVVKFADEPEQDIWPDGECNTFVGT DSTVFAPGLKKEDGLWAFTPDLCRSLGAYY  
QHKSSYHGMPMSMRYTLDLGDIRADEKLHCFCEDPEDLDTCPPKGT MNLAACVGGPLMAS  
MPHFYLGDPKLVADVDGLNPNEKDHAVYIDFELMSGTPFQAAKRLQFNLDMEPVEGIEP  
MKNLPKLILPMFWVEEGVQLNKTYTNLVKYTLFLGLKINSVLRWLSLITFSLVGLMFSAYLF  
YHKSDSLDINSILKDNKVDVASTKEPLSANPKQSSTVHPVQLPNTLIPGTNPATNPATH  
HKMEHRERY

>DmelSNMP2

MIHWSLIVSALGVCVAVLGGYCGWILFPNMVHKKVEQSVVIQDGSEQFKRFVNLPQPLNF  
KVYIFNVTNSDRIQQGAIPVEEIGPYVYKQFRQKKVKHFSRDGSKISYVQNVHFDFAVA  
SAPYTQDDRIVALNMHMNAFLQVFEREITDIFQGFANRLNSRLNQTGVRVLKRLMERIR  
GKRKSVLQISENDPGLALLVHLNANLKA VFNDRPSMFVSTSVREYLF DGVRFCINPQIA  
KAICNQIKESGSKTIREKSDGSLAFSFFGHKNGSGHEVYEVHTGKGDPMRVLEIQKLDDSH  
NLQVWLNASSEGETSVCNQINGTDA SAPPFRQRGDSMYIFSADICRSVQLFYQTDIQYQ  
GIPGYRYSIGENFINDIGPEHDNECFVDKLANVIKRKNGCLYAGALDITCLDAPVILTLP  
HMLGASNEYRKMIRGLKPD AKKHQTFVDVQSLTGTPLQGGKRVQFNMF LKSINRIGITEN  
LPTVLMPAIWVEEGIQNGEMVAFFKKLINTLKT LNIVHWATLCGGIGVAVACLIYYIYQR  
GRVVEPPVK

>TcasSNMP2

MGCSCCTIKVLLVCVVISVALLIVSLALAFKVFPDLLESEVNKAVRLEDGTKQYDRFVELP  
FPVDFKVYLFNVSNPQQVLDGTEKPKLEEIGPFVYKQYRKKTILGKNEEEDTISYTQKETF  
EFD AEASKPLTEESVVTVLN PALMSIYQLAEDLHLAGAADTCIKQTFENNQGKVFIEANVR  
KLLFDGFSFCNTSPGICGLVNDLICAIAATKRNSDLVLPDYSLIFS YLNYKRKPDDGKYTV  
KRGLT NIEKLGHIVAWNDSLYTKFWGEGTTCSEVKGTDSTLYPPRVTTDSAFYIYSTDICRF  
VKINYKGEESYKGIDGYLFETSED TLRSSAPEEDCYCSKLSRDMEGKKSCFLDGVIDMQT  
CFGVPVLFSPHFLWADNKYLSAVEGLNPVEEKHKTYLVVEPNTGTPLKGMKRIQLNGVI  
RPIVGIKSM LQTKRALLPLLWIEEGVSLPQKYVDELKSSYFDKVQIVDGVRYALIVISAILV  
GAFGIIILRKRSHAKHHV

>TcasSNMP1a

MRLPVKIAIGCAIGLVVIVFGFIAFPKMIKGVKSMINLNKGSEIRQMFVKVPFALDFKIY  
MFNVTNPMDVQKGALPVLKEVGPF CFEEWKEKVDLDDNDDDEDVMFYNPKDTFYKANG  
PGCLDGSQMITMAHPLILGMVNTVVRTKPGAISLISKAINSIYGNPDSIFMTASAMDILFDG  
VVIKCGVKDFAGKAVCSQLKEAPDLRHVDENDLAFSFIGPKNATPGKRFKVL RGVKESH  
VGRILEYDNKKEME VWPTEKCNQYKGT DGTVPFPYLTKEEGLASYAPDLCRSLVAVYSG  
DTKYDGI PVRIYTATLGDM SKNADEKCYCPTPDTCLKKGMMDLFKCAGVPVYVSLPHFY  
ESDES YVKGVVGLNPNKKDHGIQILFESTTGGPVKAAKRLQFNMPLEPNPKLPIFANLPNT

VLPLFWVEEGVALNNTFTKPLKDLFKIMKIVKIAKWLIMLGCLGGLGAAGYLYFSKKGEA  
NITPVHKVKAENGVSTLGGEVNHAMSDNEIEKY

>TcasSNMP1b

MVKWQRQLKPGNEVRDFYIKLPIPLDFRVYFFNISNPEEVKQGEKPIKQIGPYCYDAYKE  
KINVEDDKDNDTLTYNPDYTYFFNQMRDGLSQDDYVTILHPLTVGIVNAVATQKPQYLS  
AVNKALPVIFKENSIIYLTAKVREILFDGVLINCNVKDFSANAVCSQFKGQPAMVEVEKNI  
YSFSLGSRNGSIPTRITIHGKNAADIGRVVTIDNKTDLVDVWPEPECNAFRGTDGWVFP  
SFLEKEDGIWTVASDLCRSFKAQYVEDLKFHGVVVRKYFADLGDMSNPAAEKCFPAPEK  
CLPKGVMDLTKCMKVPLYCTLPFLRADEKLLQQVEGLSPELERHIIKIYFEPLTGTPLMG  
QRRIQFNLQLMPIPKVAMMKTVPALHPILWIEEGVELEGFLLKKVTSVFTLLKLMTFVRY  
IMLGLSIQGILYGGYKLYQESKSKVSPVQNGTTESKNHNQGKTGGIELPSMKNRKNENT  
KNA

>TcasSNMP1c

MSYKKITIIISACCVVTIIGVAYIYAIRDISHRNVRYKYIDRVNNVSNVDVNGGVVSVGYCYD  
YKRIDVDNADSTYTYDIYNRSGNSDDYVTIHHVSVNYVSVKTHYNDAGKSITAKVRDID  
GMINCTSRDTAMAVCTIRTKIGISKDYKYAGNGTTRITVRGIKSNGKVAVDNVTKSDWSNC  
NYKGTGDGWISGRKTIWMHATTCTNIHADVGATSNNAVNYYSNICTNCSGIDVTKCTAI  
YISHRSDSIRGVKNDTSHITRIGTSMAIRNVVKKITIMNVSVIHVWVMGVVNGWRMIKT  
YTAVMKYISVASGTAYGGYHYKNKKYSKNIVSSK

>TcasSNMP1

MTSTARRRNIMKKVYKIMDRVYNITNSVNGVVKVGYCYDAKKIDVNGDSTYTYTYNDK  
SGRTADDYVTVHIVGIVNTVSRDSIVDRAIKSIKDNIYITTKVRDDGMTINCKVDSATAVCT  
KAIGIKNVYKSIGRNGTNRVYKVRGMKKWHGRVVNHKSTVWSTKCKNRRGTDGWIIDK  
VGWTYSSDCRNMHVVTSHGVAKYADGDMSSNDKCYCKTCKGMMDTRCMGVYIATHR  
VDKVRRTVRGKITDHIVRVIIGTAKRMNIVKKISMKTAHIWIAIVGKMIKVVVAKVDVVK  
YCAVCAVAGSYCYKRKKKAVTVSKTAKA

>AplaSNMP1

MYMKTPFALDFKVYMFNITNAEAVLNGESPVLDEIGPYCYDLWKEKVDPIDNEVNDTLT  
YKGMKTWIFNKAKSAPLTGDEMVTIPHPLILGIAVAVARDKPAMLSLVSKALNSIFNPPSP  
FITATTNEILFEGLTVYCNVDFAGKAACAQIKSEAKNVIYISDKIFKLSFFGDKNGTVDERP  
FTVKRGLKNYKDIGRVVEFDNKPNNMVWPTKECNEYHGTSTIFPLLQKEEGIVAFSPDI  
CRSLAAVFEKETFVKEVKVNKYTATLGDMSADDSLKCYCPEPNKCLKKGLMEITKCVGA  
PLYASLPHFYASDESIVHGVRLHPNEEEHGIYMYFEPMTGTPLGARKRLQFSMPLEPIPK  
ISFMKNLPTTILPVFWVEEGADLGDEYVDQIKSAFKMIQIVFTAKWILFVVS AVTGAIAGL  
MHFKNSKNILVTPVKNDESKGRSSVINTIDSLNTYVNGSNNKY
